# Supplementary material for: Association of ApoE gene polymorphisms with serum lipid levels and the risk of type 2 diabetes mellitus in the Chinese Han population of central China
Source: PeerJ. 2023 Apr 24;11:e15226. doi: 10.7717/peerj.15226 (PMC10135405; doi:10.7717/peerj.15226)
Supplement: Supplemental Information 1 [file peerj-11-15226-s001.xlsx]

## Sheet: Sheet1
No.	Sex	Age	Genotyping	Genotyping	diabetes	Hypertension	TG	TC	HDL- C	LDL- C,	Apo- A1	Apo- B
1	0	52	*1b/*15(388G/G,521T/C)	E2/E3	0	0	1.62	3.14	1.38	1.18
2	0	62	*1a/*1a(388A/A,521T/T)	E2/E3	0	1	1.09	3.38	1.29	1.55	1	0.57
3	0	63	*1b/*15(388G/G,521T/C)	E2/E3	0	0	0.9	4.88	1.14	3.19	1.01	1.09
4	0	54	*1b/*15(388G/G,521T/C)	E2/E3	0	1	0.64	3.58	0.64	2.26
5	0	57	*1a/*1b(388A/G,521T/T)	E2/E3	0	0	0.81	3.91	1.37	2.1	1.96	0.75
6	0	55	*1a/*1b(388A/G,521T/T)	E2/E3	0	1	0.87	3.13	0.66	0.59
7	0	85	*1b/*15(388G/G,521T/C)	E2/E3	0	1	0.91	2.95	0.7	1.8
8	0	83	*1b/*15(388G/G,521T/C)	E2/E3	0	1	3.46	4.13	0.9	2.14	1.86	0.9
9	0	69	*1a/*1b(388A/G,521T/T)	E2/E3	0	1	1.22	3.69	1.2	1.91	1.05	0.67
10	0	58	*1a/*1a(388A/A,521T/T)	E2/E3	0	1	2.39	3.44	0.66	1.83	1.73	0.7
11	0	62	*1b/*15(388G/G,521T/C)	E2/E3	0	0	1.16	3.14	1.28	4.5	1.02	1.55
12	0	55	*1a/*1b(388A/G,521T/T)	E3/E4	0	1	1.72	3.58	1.05	4.69	1.81	2.49
13	0	51	*1b/*15(388G/G,521T/C)	E3/E4	0	1	1.15	4.41	0.51	2.41	1.06	0.85
14	0	86	*1a/*1b(388A/G,521T/T)	E2/E3	0	1	0.58	3.85	0.94	2.49	1.77	0.92
15	0	76	*1b/*15(388G/G,521T/C)	E2/E3	0	0	0.75	7.37	1.6	1.46	1.04	1.92
16	0	73	*1b/*15(388G/G,521T/C)	E2/E3	0	1	0.59	2.8	1.07	1.26
17	1	65	*1b/*15(388G/G,521T/C)	E2/E4	0	1	2	3.16	0.97	1.21	1.93	0.64
18	1	97	*1b/*15(388G/G,521T/C)	E2/E3	0	1	2.51	3.4	0.89	1.59	1.91	0.84
19	0	84	*1a/*1b(388A/G,521T/T)	E2/E3	0	0	0.8	2.71	0.61	1.61	1.91
20	1	58	*1b/*15(388G/G,521T/C)	E2/E3	0	0	1.47	4.93	0.38	2.9	1.96
21	1	60	*1a/*1b(388A/G,521T/T)	E3/E4	0	1	1.6	4.52	0.96	2.86	1.96
22	1	57	*1b/*15(388G/G,521T/C)	E2/E3	0	0	1.3	5.76	0.84	3.17	1.29	0.97
23	1	71	*1a/*1b(388A/G,521T/T)	E3/E4	0	1	1.35	6.45	0.76	1.88	1.18	1.2
24	1	87	*1a/*1b(388A/G,521T/T)	E3/E4	0	1	0.76	3.09	1.21	1.37	1.89	0.52
25	1	83	*1a/*1b(388A/G,521T/T)	E2/E3	0	1	1.27	4.21	1.12	2.49	1.95
26	1	53	*1b/*1b(388G/G,521T/T)	E3/E4	0	0	1.65	4.27	1.2	2.58	1.85
27	1	63	*1a/*1b(388A/G,521T/T)	E3/E4	0	1	1.57	4.53	1.08	2.78	1.88	1.12
28	1	61	*1b/*1b(388G/G,521T/T)	E3/E4	0	1	1.57	3.85	0.91	4.04	1.95
29	0	71	*1b/*1b(388G/G,521T/T)	E2/E3	0	1	1.5	1.87	0.52	0.67	1.47	0.41
30	0	52	*1a/*15(388A/G,521T/C)	E2/E3	0	0	0.59	2.64	0.78	1.44	1.82	0.53
31	0	73	*1b/*1b(388G/G,521T/T)	E2/E3	0	1	1.36	3.68	1.55	3.55	1.13	1.28
32	1	97	*1a/*1b(388A/G,521T/T)	E2/E3	0	1	1.32	4.05	1.15	1.89	1.86	0.82
33	1	83	*1b/*15(388G/G,521T/C)	E2/E3	0	1	2.19	3.96	0.95	2.24	2.32
34	0	85	*1a/*1b(388A/G,521T/T)	E2/E3	0	1	0.76	4.97	1.43	1.28	1.95
35	1	72	*1b/*1b(388G/G,521T/T)	E3/E3	0	1	0.62	5.51	1.31	3.38	0.97	1.03
36	0	64	*1a/*1b(388A/G,521T/T)	E2/E3	0	1	1.36	4.41	1.05	2.54	1.92
37	1	57	*1b/*15(388G/G,521T/C)	E2/E3	0	0	3.96	5.63	0.52	2.4	1.84
38	0	79	*1b/*1b(388G/G,521T/T)	E3/E3	0	1	1.26	3.96	1.01	2.24	1.65
39	1	52	*1a/*1b(388A/G,521T/T)	E2/E3	0	1	1.28	6.39	1.25	4.67	1.35
40	1	81	*1b/*1b(388G/G,521T/T)	E3/E3	0	1	3.76	5.1	0.78	3.23	1.85	1.05
41	1	70	*1b/*1b(388G/G,521T/T)	E3/E3	0	1	0.79	5.02	1.29	3.1	1.65	1.06
42	1	76	*1a/*15(388A/G,521T/C)	E3/E3	0	1	0.72	4.36	0.99	1.61	1.24
43	1	60	*1b/*1b(388G/G,521T/T)	E3/E3	0	0	0.96	5.35	0.65	3.2
44	0	52	*1a/*1b(388A/G,521T/T)	E3/E3	0	1	1.51	6.77	1.42	1
45	0	79	*1b/*1b(388G/G,521T/T)	E3/E4	0	0	2.91	3.52	0.48	1.88
46	1	74	*1a/*1b(388A/G,521T/T)	E3/E4	0	1	1.11	5.16	1.87	2.88
47	1	97	*1a/*1a(388A/A,521T/T)	E3/E4	0	1	0.68	3	0.82	1.79	0.7	0.75
48	0	58	*1b/*1b(388G/G,521T/T)	E3/E3	0	0	0.76	3.77	1.58	3.65
49	0	43	*1a/*15(388A/G,521T/C)	E3/E3	0	0	3.94	5.74	1.05	3.46	1.04	1.33
50	1	53	*1a/*1b(388A/G,521T/T)	E2/E4	0	1	0.66	5.31	1.73	2.96	1.33	0.99
51	1	51	*1a/*1a(388A/A,521T/T)	E3/E4	0	0	0.73	3.27	2.05	3.41	1.54	1.08
52	0	62	*1a/*15(388A/G,521T/C)	E3/E3	0	0	1.44	3.96	1.51	1.68	1.22	1.85
53	1	73	*1a/*1b(388A/G,521T/T)	E3/E4	0	1	1.8	3.34	0.68	1.43	1.43	1.3
54	0	85	*1a/*1b(388A/G,521T/T)	E3/E3	0	1	1.1	3.99	0.81	2.59
55	0	35	*1b/*1b(388G/G,521T/T)	E3/E3	0	0	21.4	1.83	1.4	1.55	5.31
56	0	72	*1a/*1b(388A/G,521T/T)	E3/E3	0	1	0.83	3.9	1.09	2.18	1.94	0.72
57	0	62	*1a/*1b(388A/G,521T/T)	E3/E3	0	1	1.21	4.75	1.07	3.26	1.02	1.17
58	0	68	*1a/*15(388A/G,521T/C)	E3/E3	0	0	1.02	4.38	1.38	2.16
59	1	68	*1a/*15(388A/G,521T/C)	E3/E3	0	1	0.98	4.65	1.3	2.61
60	1	56	*1a/*1b(388A/G,521T/T)	E3/E4	0	0	1.04	7.59	0.68	1.57
61	1	83	*1a/*1b(388A/G,521T/T)	E3/E3	0	1	2.61	4.98	0.96	3.15	1.09	1.15
62	1	80	*1a/*1b(388A/G,521T/T)	E2/E3	0	1	1.72	5.37	1.41	3.13
63	1	72	*1a/*1b(388A/G,521T/T)	E3/E4	0	1	0.87	5.35	1.05	3.6
64	0	35	*1b/*1b(388G/G,521T/T)	E3/E4	0	0	1.33	5.26	1.18	3.25
65	1	68	*1a/*1b(388A/G,521T/T)	E3/E3	0	1	1.6	5.58	1.18	3.41	1.95	1.41
66	0	56	*15/*15(388G/G,521C/C)	E3/E3	0	1	5.23	4.38	0.91	2.35	1.88	0.7
67	1	63	*1b/*1b(388G/G,521T/T)	E3/E4	0	1	1.42	5.93	1.17	1.95	1.09	1.59
68	0	61	*1a/*1b(388A/G,521T/T)	E3/E3	0	1	1.48	4.8	1.06	3.26
69	0	56	*1b/*1b(388G/G,521T/T)	E3/E3	0	0	1.41	4.17	0.72	2.72	1.79	1.14
70	0	75	*1a/*1b(388A/G,521T/T)	E3/E3	0	1	1.77	3.31	0.59	1.86
71	0	82	*1b/*15(388G/G,521T/C)	E3/E3	0	1	0.94	1.59	0.5	0.56
72	0	74	*1a/*1b(388A/G,521T/T)	E2/E3	0	1	0.56	4.15	2.34	1.43
73	0	35	*1b/*1b(388G/G,521T/T)	E3/E3	0	0	8.1	3.74	1.2	1.15	1.1	1.33
74	0	60	*1b/*1b(388G/G,521T/T)	E3/E4	0	0	1.63	3.81	0.76	2.6
75	0	43	*1b/*1b(388G/G,521T/T)	E2/E2	0	1	1.21	4.3	1.14	1.73	1.02	0.61
76	0	58	*1b/*1b(388G/G,521T/T)	E3/E3	0	1	5.84	5	1.21	1.66
77	1	97	*1b/*15(388G/G,521T/C)	E3/E3	0	1	5.91	3.6	0.82	1.04	1.07	0.57
78	1	83	*1b/*1b(388G/G,521T/T)	E3/E4	0	1	1.46	5.02	1.05	3.24
79	1	72	*1b/*1b(388G/G,521T/T)	E3/E3	0	1	1.78	3.73	1.22	1.88	1.02	0.69
80	1	58	*1b/*1b(388G/G,521T/T)	E3/E3	0	1	1.44	4.4	1.03	2.72	1.11	0.79
81	1	91	*1a/*1a(388A/A,521T/T)	E3/E3	0	1	1.25	6.5	1.65	3.97	1.25	1.46
82	0	78	*1a/*1b(388A/G,521T/T)	E2/E3	0	1	1.73	3.46	0.84	1.41	1.88	0.56
83	0	55	*1b/*15(388G/G,521T/C)	E3/E3	0	0	1.27	4.83	1.73	2.4	1.64	0.94
84	1	87	*1a/*1b(388A/G,521T/T)	E3/E4	0	1	0.51	5.08	1.73	2.58	1.24	0.75
85	0	35	*1a/*1b(388A/G,521T/T)	E3/E3	0	1	4.95	4.87	0.91	3.11
86	0	73	*1a/*1b(388A/G,521T/T)	E3/E3	0	1	1.11	4.92	0.96	3.71	1.94	1.32
87	1	88	*1b/*1b(388G/G,521T/T)	E3/E3	0	1	0.64	3.3	0.89	1.87	1.8	0.78
88	1	56	*1a/*1a(388A/A,521T/T)	E2/E4	0	1	0.97	4.85	0.96	3.57	1.07	1.18
89	0	67	*1b/*1b(388G/G,521T/T)	E3/E3	0	1	0.69	4.68	1.57	2.29
90	1	93	*1a/*1b(388A/G,521T/T)	E3/E3	0	1	1.79	5.09	1.03	3.11	1.18	1.1
91	1	66	*1b/*15(388G/G,521T/C)	E3/E3	0	1	1.79	5.09	1.46	3.06
92	1	80	*1a/*1b(388A/G,521T/T)	E3/E3	0	0	1.01	5.39	1.46	3.09	1.35	1
93	1	65	*1a/*1b(388A/G,521T/T)	E3/E3	0	1	0.67	4.75	1.14	3.16
94	1	93	*1b/*1b(388G/G,521T/T)	E3/E3	0	1	0.48	2.97	1.28	1.12	1.02	0.41
95	0	57	*1b/*15(388G/G,521T/C)	E3/E3	0	1	1.06	5.09	1.07	3.53	1.98	1.07
96	1	87	*1b/*1b(388G/G,521T/T)	E3/E3	0	1	0.84	3.17	1.13	1.2
97	1	59	*1b/*1b(388G/G,521T/T)	E3/E3	0	1	2.33	5.51	1.14	3.52	1.21	1.16
98	1	49	*1a/*1b(388A/G,521T/T)	E3/E3	0	1	0.38	4.65	1.5	2.28
99	1	78	*1b/*1b(388G/G,521T/T)	E3/E4	0	1	1.69	4.58	1.45	2.26
100	0	71	*1b/*15(388G/G,521T/C)	E3/E3	0	0	0.47	2.73	0.8	1.58	1.51	0.46
101	0	83	*1b/*1b(388G/G,521T/T)	E3/E3	0	0	1.17	3.88	1.86	1.15	1.03	0.36
102	0	71	*1b/*1b(388G/G,521T/T)	E3/E3	0	1	2.89	4.97	0.95	3.19	1.07	1.02
103	1	72	*1a/*1b(388A/G,521T/T)	E4/E4	0	0	1.02	6.32	1.74	3.9
104	1	85	*1b/*1b(388G/G,521T/T)	E3/E3	0	1	0.75	5.14	1.76	2.49	1.63	0.69
105	1	52	*1b/*15(388G/G,521T/C)	E2/E4	0	0	1.31	4.78	1.54	2.24
106	0	50	*1b/*15(388G/G,521T/C)	E3/E3	0	1	8.64	5.76	1	1.68	1.02	0.89
107	0	65	*1a/*1b(388A/G,521T/T)	E3/E3	0	0	0.49	4.41	1.47	2.36	1.35	0.74
108	0	66	*1b/*15(388G/G,521T/C)	E3/E4	0	0	1	3.74	0.94	2.53
109	1	88	*1a/*1b(388A/G,521T/T)	E3/E4	0	1	0.88	3.41	1.19	1.4
110	0	39	*1b/*1b(388G/G,521T/T)	E3/E3	0	0	1.03	5.92	1.73	3.46	1.27	1.05
111	1	58	*1a/*1a(388A/A,521T/T)	E3/E3	0	1	1.73	5.35	1.48	2.62
112	0	62	*1a/*1b(388A/G,521T/T)	E3/E3	0	0	1.17	2.52	0.51	1.33
113	1	73	*1b/*1b(388G/G,521T/T)	E3/E3	0	1	2.2	4.77	1.25	2.59	1.29	0.99
114	0	57	*1a/*1b(388A/G,521T/T)	E3/E4	0	1	1.2	4.32	1.11	2.17	0.98	0.69
115	0	75	*1b/*1b(388G/G,521T/T)	E3/E4	0	1	1.29	3.52	0.95	1.87
116	0	88	*1b/*1b(388G/G,521T/T)	E2/E3	0	0	0.87	3.14	0.99	1.69
117	1	76	*1a/*1a(388A/A,521T/T)	E3/E4	0	1	1.13	5.02	1.29	1
118	1	53	*1b/*15(388G/G,521T/C)	E3/E3	0	1	1.7	3.56	1.09	1.65
119	0	65	*1b/*15(388G/G,521T/C)	E2/E3	0	1	1.39	3.65	1.16	1.53	1.04	0.52
120	1	64	*1b/*1b(388G/G,521T/T)	E3/E3	0	0	1.68	7.01	1.63	1.57	1.52	1.43
121	1	57	*1a/*1b(388A/G,521T/T)	E2/E3	0	1	3.5	6.32	1.17	3.3
122	1	88	*1b/*1b(388G/G,521T/T)	E3/E3	0	1	0.49	2.58	1.06	1.1	0.98	0.4
123	1	56	*1a/*1b(388A/G,521T/T)	E3/E3	0	1	0.76	3.35	0.95	1.69	1.04	0.58
124	1	47	*1b/*1b(388G/G,521T/T)	E3/E3	0	0	1.12	5.85	1.48	3.7
125	1	56	*1b/*15(388G/G,521T/C)	E3/E3	0	1	1.38	5.16	1.14	2.94	1.07	1.04
126	1	56	*1b/*15(388G/G,521T/C)	E3/E3	0	0	1.5	6.72	1.49	4.5	1.4	1.53
127	0	51	*1a/*1b(388A/G,521T/T)	E3/E3	0	1	6.07	8.1	0.95	2.44	1.87	1.76
128	1	63	*1b/*1b(388G/G,521T/T)	E2/E3	0	1	2.48	4.49	0.99	2.44
129	1	82	*1a/*1a(388A/A,521T/T)	E3/E3	0	1	1.75	3.49	0.8	2.02	1.72	0.79
130	1	69	*1b/*1b(388G/G,521T/T)	E3/E3	0	0	1.32	5.16	0.93	2.98
131	0	73	*1a/*1b(388A/G,521T/T)	E3/E3	0	1	0.73	4.48	0.91	3.35	1.96	0.98
132	0	62	*1a/*1b(388A/G,521T/T)	E3/E3	0	1	2.46	5.88	0.86	1.62	1.95	1.4
133	1	84	*1a/*1b(388A/G,521T/T)	E3/E3	0	1	0.83	3.47	1.19	1.51	1.83	0.49
134	1	89	*1b/*1b(388G/G,521T/T)	E3/E3	0	1	1.34	5.7	1.44	3.42	1.29	1.23
135	1	81	*15/*15(388G/G,521C/C)	E2/E4	0	1	0.96	2.74	1.1	1.02
136	0	60	*1b/*1b(388G/G,521T/T)	E3/E3	0	0	6.26	5.55	0.9	1.76	1.12	0.6
137	1	60	*1b/*1b(388G/G,521T/T)	E3/E3	0	0	0.69	6.23	1.79	3.73
138	0	71	*1a/*1a(388A/A,521T/T)	E3/E3	0	1	0.84	5.51	1.38	3.4
139	1	58	*1a/*1a(388A/A,521T/T)	E3/E3	0	1	2.03	5.21	1.42	2.61
140	0	64	*1a/*1b(388A/G,521T/T)	E3/E3	0	1	0.76	3.22	0.84	1.97	0.89	0.6
141	0	85	*1b/*1b(388G/G,521T/T)	E3/E3	0	0	0.94	4.02	1.05	2.26	1.08	0.73
142	0	46	*1b/*1b(388G/G,521T/T)	E3/E3	0	1	5.08	5.5	0.93	3.55	0.96	1.09
143	1	88	*1a/*1b(388A/G,521T/T)	E3/E3	0	1	1.94	6.02	1.24	3.6	1.16	1.27
144	1	88	*1b/*1b(388G/G,521T/T)	E3/E3	0	0	0.38	4.22	1.15	2.39
145	0	82	*1a/*1b(388A/G,521T/T)	E3/E3	0	1	1.71	3.54	1.05	1.71
146	1	56	*1b/*1b(388G/G,521T/T)	E3/E3	0	1	5.33	5.28	1.05	2.31
147	1	95	*1a/*1b(388A/G,521T/T)	E3/E3	0	0	1.84	3.1	0.79	1.36	1.99	0.62
148	1	57	*1a/*1a(388A/A,521T/T)	E3/E3	0	1	2.1	6.48	1.29	4.07	1.33	1.48
149	1	59	*1a/*1a(388A/A,521T/T)	E3/E3	0	1	1.79	5.29	1.44	2.48
150	1	88	*1b/*1b(388G/G,521T/T)	E3/E3	0	1	0.55	2.93	1.16	0.99	1.08	0.34
151	0	61	*1a/*1b(388A/G,521T/T)	E3/E3	0	1	1.63	5.12	0.93	3.53
152	1	55	*1a/*1b(388A/G,521T/T)	E3/E3	0	0	0.45	4.57	1.61	2.26	1.42	0.72
153	0	62	*1b/*1b(388G/G,521T/T)	E3/E3	0	0	0.77	3.97	1.17	2.23	1	0.7
154	1	69	*1b/*15(388G/G,521T/C)	E3/E4	0	0	1.29	4.36	1.2	2.17
155	1	56	*1a/*1b(388A/G,521T/T)	E3/E3	0	0	3.06	5.61	1.14	2.61
156	1	51	*1a/*1b(388A/G,521T/T)	E3/E3	0	0	1.79	5.89	0.42	3.3
157	0	57	*1a/*15(388A/G,521T/C)	E2/E3	0	1	1.84	4.64	0.94	2.54	1.03	0.99
158	0	85	*1a/*1b(388A/G,521T/T)	E3/E4	0	1	1.75	6.73	0.99	4.67
159	1	64	*1b/*1b(388G/G,521T/T)	E3/E3	0	0	1.36	3.65	0.92	1.95	1.98	0.64
160	0	75	*1a/*1b(388A/G,521T/T)	E3/E3	0	1	1.18	4.37	0.86	2.6	1.97	0.89
161	1	88	*1a/*1b(388A/G,521T/T)	E3/E4	0	1	0.76	3.4	1.39	1.24
162	0	62	*1b/*1b(388G/G,521T/T)	E3/E4	0	0	2.68	4.73	1.18	2.09	1.16	0.89
163	0	62	*1b/*1b(388G/G,521T/T)	E4/E4	0	0	1.43	3.54	0.7	2.06	1.69	0.67
164	0	57	*1a/*1b(388A/G,521T/T)	E3/E3	0	0	2.18	3.06	1.25	4.91
165	1	93	*1b/*1b(388G/G,521T/T)	E3/E3	0	1	0.72	3.79	0.73	1.41	1.36	0.51
166	0	70	*1b/*1b(388G/G,521T/T)	E3/E4	0	1	1.21	3.85	1.45	3.33
167	0	46	*1b/*1b(388G/G,521T/T)	E3/E3	0	1	1.17	3.18	0.88	1.66	1.97	0.59
168	0	74	*1a/*1b(388A/G,521T/T)	E3/E3	0	1	0.77	3.4	0.99	2.69	1.87	0.9
169	1	54	*1b/*1b(388G/G,521T/T)	E3/E3	0	1	0.87	3.63	1.62	3.33	1.34	0.99
170	1	95	*1b/*1b(388G/G,521T/T)	E2/E4	0	1	0.86	4.47	1.31	2.39	1.01	0.89
171	1	44	*1a/*1a(388A/A,521T/T)	E3/E3	0	0	0.73	4.15	1.63	1.8
172	1	51	*1a/*15(388A/G,521T/C)	E3/E3	0	0	1.44	4.46	1.1	2.1	1.13	0.89
173	0	48	*1a/*1b(388A/G,521T/T)	E3/E4	0	0	1.3	5.15	0.93	3.61
174	1	59	*1a/*1a(388A/A,521T/T)	E3/E3	0	1	1.79	5.22	1.28	2.64
175	0	92	*1b/*1b(388G/G,521T/T)	E3/E3	0	1	0.79	6.13	1.76	3.55	1.34	1.08
176	1	74	*1a/*1b(388A/G,521T/T)	E3/E4	0	0	1.37	4.4	0.85	2.87	0.97	1
177	1	90	*1b/*1b(388G/G,521T/T)	E3/E3	0	1	1.61	6.34	1.52	3.47	1.19	1.1
178	1	55	*1a/*1b(388A/G,521T/T)	E3/E3	0	0	2.57	5.41	1	2.91	0.94	0.98
179	1	77	*1a/*1b(388A/G,521T/T)	E2/E3	0	1	1.03	4.07	1.16	1.91	0.99	0.59
180	0	66	*1b/*1b(388G/G,521T/T)	E3/E3	0	1	0.66	4.51	0.97	2.63	0.91	0.86
181	1	88	*1b/*1b(388G/G,521T/T)	E3/E4	0	1	1.87	2.22	1.04	3.26	0.98	1.09
182	0	87	*1a/*1a(388A/A,521T/T)	E3/E3	0	1	0.66	3.38	0.88	1.87
183	1	51	*1a/*1a(388A/A,521T/T)	E3/E4	0	0	0.95	3.16	1.11	1.32
184	1	72	*1b/*1b(388G/G,521T/T)	E3/E3	0	1	2.65	2.98	0.9	0.99
185	1	46	*1b/*1b(388G/G,521T/T)	E3/E3	0	0	0.68	4.13	1.34	2.06	1.1	0.65
186	1	74	*1b/*15(388G/G,521T/C)	E3/E4	0	1	0.87	3.89	1.17	1.89
187	1	69	*1a/*1b(388A/G,521T/T)	E3/E3	0	1	1.81	4.41	0.92	2.37	0.92	0.8
188	1	84	*1a/*1b(388A/G,521T/T)	E3/E3	0	1	0.97	4.74	1.69	2.17	1.23	0.68
189	0	43	*1b/*1b(388G/G,521T/T)	E2/E3	0	0	0.69	5.59	3.61	1.1	2.19	0.37
190	1	62	*1a/*1a(388A/A,521T/T)	E3/E3	0	0	0.69	4.15	1.01	2.51	0.95	0.74
191	1	35	*1b/*1b(388G/G,521T/T)	E2/E3	0	0	2.67	2.13	1.15	3.79	1.06	1.34
192	1	45	*1b/*1b(388G/G,521T/T)	E3/E4	0	0	0.52	5.61	1.45	3.71	1.16	1.16
193	1	63	*1b/*1b(388G/G,521T/T)	E3/E3	0	0	1.69	5.38	1.49	2.96
194	1	60	*1a/*15(388A/G,521T/C)	E3/E3	0	0	1.07	4.82	1.23	3.06
195	0	81	*1b/*1b(388G/G,521T/T)	E3/E3	0	1	1.63	4.67	0.75	2.7		0.91
196	1	33	*1a/*1b(388A/G,521T/T)	E3/E3	0	0	1.02	5.22	1.36	3.3
197	0	57	*1a/*1a(388A/A,521T/T)	E3/E4	0	0	2.69	3.76	0.76	1.74		0.7
198	0	55	*1a/*1b(388A/G,521T/T)	E3/E4	0	0	3.51	2.03	1.03	2.96	1.01	1.21
199	0	68	*1a/*1a(388A/A,521T/T)	E3/E3	0	1	1.08	2.52	1.2	2.73	1.08	0.88
200	1	59	*1a/*1a(388A/A,521T/T)	E3/E3	0	1	1.88	2.26	1.3	2.73
201	0	64	*1b/*1b(388G/G,521T/T)	E2/E3	0	1	2.89	4.78	0.84	2.31
202	1	45	*1b/*1b(388G/G,521T/T)	E3/E3	0	0	1.03	4.74	1.42	2.3	1.17	0.7
203	1	65	*1a/*1b(388A/G,521T/T)	E3/E3	0	1	2.25	4.24	0.9	2.34	0.98	0.83
204	1	84	*1a/*1b(388A/G,521T/T)	E3/E3	0	1	0.76	3.36	1.11	1.44	0.96	0.51
205	0	38	*1a/*1b(388A/G,521T/T)	E3/E3	0	0	2.73	6.13	1.17	3.12		1.07
206	1	84	*1b/*15(388G/G,521T/C)	E3/E3	0	0	1.21	3.17	0.85	1.44		0.46
207	0	59	*1b/*1b(388G/G,521T/T)	E3/E3	0	0	0.95	2.24	1.09	2.94
208	1	54	*1b/*1b(388G/G,521T/T)	E3/E4	0	0	1.93	4.87	0.98	2.5		0.85
209	0	63	*1a/*15(388A/G,521T/C)	E3/E3	0	1	0.59	2.62	0.98	0.89	0.88	0.28
210	1	95	*1b/*1b(388G/G,521T/T)	E3/E3	0	0	0.76	2.43	1.23	3.3
211	0	58	*1b/*1b(388G/G,521T/T)	E3/E3	0	0	1.62	3.28	0.62	1.64	0.81	0.54
212	1	95	*1a/*1b(388A/G,521T/T)	E3/E3	0	1	2.52	5.85	1.32	2.98	1.46	1
213	1	59	*1a/*1b(388A/G,521T/T)	E3/E3	0	1	2.13	5.29	0.87	3.46	0.94	1.27
214	1	55	*1b/*15(388G/G,521T/C)	E3/E3	0	0	1.12	5.01	1.16	3.23	1.16	1.02
215	0	65	*1a/*1b(388A/G,521T/T)	E3/E3	0	0	1.28	3.02	0.65	1.47	0.87	0.51
216	1	84	*1a/*1b(388A/G,521T/T)	E3/E3	0	1	0.47	6.06	1.96	3.25	1.41
217	1	56	*1b/*1b(388G/G,521T/T)	E3/E4	0	0	1.67	7.61	1.49	4.57
218	0	63	*1a/*15(388A/G,521T/C)	E3/E3	0	1	1.17	5.68	1.39	3.75	1.36	1.12
219	0	67	*1a/*1a(388A/A,521T/T)	E3/E4	0	0	0.43	3.53	1.38	1.48	1.12	0.45
220	1	49	*1b/*1b(388G/G,521T/T)	E3/E3	0	0	0.91	4.74	1.21	2.71
221	1	64	*1b/*15(388G/G,521T/C)	E3/E4	0	0	2.06	2.53	1.2	4.16
222	1	93	*1b/*1b(388G/G,521T/T)	E3/E3	0	1	0.7	3.38	1.4	1.24
223	1	69	*1a/*1b(388A/G,521T/T)	E3/E3	0	1	0.79	4.78	1.4	2.47
224	1	43	*1a/*1b(388A/G,521T/T)	E3/E3	0	0	1.73	4.25	0.89	2.61	0.98	0.91
225	0	65	*1a/*1b(388A/G,521T/T)	E2/E3	0	1	1.07	3.59	1.11	1.77
226	1	51	*1b/*1b(388G/G,521T/T)	E3/E3	0	1	6.19	5.42	0.85	2.12	0.93	0.78
227	1	70	*1b/*1b(388G/G,521T/T)	E3/E3	0	1	1.1	4.76	1.59	2.2
228	1	68	*1b/*1b(388G/G,521T/T)	E3/E3	0	0	1.03	4.02	1.4	1.73	1.39	0.62
229	1	70	*1b/*1b(388G/G,521T/T)	E3/E3	0	0	1.34	5.85	1.43	3.15	1.48	1.01
230	1	32	*1a/*1b(388A/G,521T/T)	E2/E3	0	1	1.11	5.05	1.09	2.94	1.17	1.01
231	1	56	*1a/*1b(388A/G,521T/T)	E3/E3	0	0	0.85	5.54	1.5	3.31	1.34	1.02
232	0	65	*1a/*1b(388A/G,521T/T)	E2/E3	0	0	1.74	5.55	1.23	3.19
233	1	48	*15/*15(388G/G,521C/C)	E3/E3	0	0	0.7	4.93	1.45	2.54	1.45	0.86
234	0	56	*1b/*1b(388G/G,521T/T)	E3/E3	0	1	1.32	5.52	1.1	3.55	1.05	1.11
235	0	44	*1a/*1b(388A/G,521T/T)	E3/E3	0	0	2.89	5.47	0.96	3.27	0.97	1.25
236	1	70	*1a/*1b(388A/G,521T/T)	E3/E3	0	0	0.85	4.79	1.01	3.11
237	0	69	*1b/*15(388G/G,521T/C)	E3/E3	0	0	0.75	4.64	1.2	2.6
238	1	45	*1a/*15(388A/G,521T/C)	E3/E3	0	0	0.88	4.36	1.48	2
239	0	26	*1b/*1b(388G/G,521T/T)	E3/E3	0	0	0.95	4.83	1.08	3.14	0.93
240	0	44	*1a/*1b(388A/G,521T/T)	E3/E3	0	1	1.88	5.05	0.94	3.16	1.08	1.08
241	1	81	*1a/*1b(388A/G,521T/T)	E3/E3	0	1	0.99	4.07	1.23	1.93	1.21	0.62
242	0	56	*1a/*1a(388A/A,521T/T)	E3/E3	0	0	2.49	4.71	0.83	2.69	1.01	0.93
243	0	83	*1a/*1b(388A/G,521T/T)	E3/E4	0	0	0.89	4.61	0.9	2.58	0.79	0.78
244	1	88	*1b/*1b(388G/G,521T/T)	E3/E3	0	1	0.76	2.85	1.09	0.97	1.15	0.39
245	1	59	*1a/*1a(388A/A,521T/T)	E3/E3	0	1	2.14	4.84	0.98	2.58
246	1	72	*1b/*1b(388G/G,521T/T)	E3/E3	0	1	1.83	2.87	0.99	0.9	1.12	0.36
247	1	94	*1a/*1b(388A/G,521T/T)	E3/E3	0	1	2.41	3.67	0.88	1.24	1.01	0.64
248	0	40	*1a/*1b(388A/G,521T/T)	E3/E3	0	1	1.35	4.78	0.95	2.76	1.12	0.93
249	0	39	*1a/*1a(388A/A,521T/T)	E3/E3	0	0	1.64	3.86	0.93	2.04	1.07	0.72
250	1	90	*1b/*1b(388G/G,521T/T)	E3/E3	0	1	1.31	4.51	0.79	2.71	0.81	1.01
251	0	51	*1a/*1b(388A/G,521T/T)	E3/E3	0	1	3.07	4.16	0.88	1.98
252	0	56	*1a/*1a(388A/A,521T/T)	E3/E3	0	1	2.75	3.01	0.61	1.52
253	1	85	*1b/*1b(388G/G,521T/T)	E3/E3	0	1	1.02	5.39	1.28	3.15	1.21	1.06
254	1	91	*15/*15(388G/G,521C/C)	E3/E3	0	0	0.92	3.26	0.88	1.8
255	1	72	*1b/*1b(388G/G,521T/T)	E2/E4	0	1	0.76	3.67	0.94	1.95
256	1	65	*1b/*1b(388G/G,521T/T)	E2/E3	0	0	1.78	4.29	1.1	2.21	1.23	0.82
257	0	36	*1b/*1b(388G/G,521T/T)	E3/E4	0	0	1.8	5.05	1.07	2.91	1.12	1.06
258	1	72	*1b/*1b(388G/G,521T/T)	E3/E3	0	0	1.74	5.34	1.1	3.12	0.95	1.1
259	0	56	*1b/*1b(388G/G,521T/T)	E3/E3	0	0	0.8	4.13	1.13	2.21	1.19	0.63
260	1	95	*1a/*1b(388A/G,521T/T)	E3/E3	0	0	2.1	2.68	0.64	1.05	0.92	0.51
261	0	62	*1a/*1b(388A/G,521T/T)	E3/E4	0	0	1.28	4.73	1.3	2.75	1.18	0.75
262	1	71	*1a/*1b(388A/G,521T/T)	E3/E4	0	0	0.63	3.74	1.31	1.75
263	1	53	*1a/*1b(388A/G,521T/T)	E3/E4	0	1	1.63	5.41	1.01	3.28
264	1	46	*1a/*1b(388A/G,521T/T)	E3/E3	0	1	1.4	3.88	0.98	2.23
265	1	93	*1b/*1b(388G/G,521T/T)	E3/E3	0	1	0.77	3.26	1.39	1.18	1.17	0.43
266	0	67	*1b/*1b(388G/G,521T/T)	E3/E3	0	1	1.68	3.44	2.57	2.8
267	1	88	*1a/*1b(388A/G,521T/T)	E3/E4	0	1	0.7	3.14	1.15	1.19	1.12	0.44
268	1	73	*1b/*1b(388G/G,521T/T)	E3/E3	0	1	1.36	6.99	0.85	2.38	0.88	0.65
269	0	55	*1b/*1b(388G/G,521T/T)	E3/E3	0	0	1.07	5.8	1.54	3.37
270	1	85	*1b/*1b(388G/G,521T/T)	E3/E3	0	0	1.33	4.17	0.76	2.7
271	1	88	*1b/*1b(388G/G,521T/T)	E3/E4	0	1	1.74	4.3	1.02	2.3	1.05	0.75
272	1	85	*1a/*1b(388A/G,521T/T)	E3/E3	0	1	0.88	3	0.87	1.2	0.95	0.34
273	1	92	*1a/*1a(388A/A,521T/T)	E3/E3	0	1	0.91	3.12	0.72	1.89	0.74	0.65
274	1	65	*1b/*1b(388G/G,521T/T)	E3/E3	0	1	3.83	5.47	1.02	2.89	1.18	1.07
275	0	78	*1b/*1b(388G/G,521T/T)	E3/E3	0	1	0.8	6.17	1.22	4.34	1.09	1.35
276	1	62	*1b/*1b(388G/G,521T/T)	E3/E3	0	1	1.47	5.45	0.94	2.75	1.1	0.9
277	0	50	*1a/*1b(388A/G,521T/T)	E3/E3	0	1	1.1	4.39	0.98	2.61	1.09	0.87
278	0	87	*1b/*15(388G/G,521T/C)	E3/E3	0	1	0.88	4.64	1.03	2.36	0.84	0.7
279	1	88	*1b/*1b(388G/G,521T/T)	E3/E3	0	1	0.72	2.58	1.02	0.88	1.07	0.3
280	0	57	*1b/*1b(388G/G,521T/T)	E3/E4	0	0	0.98	3.38	0.83	2.16
281	0	27	*1b/*15(388G/G,521T/C)	E3/E3	0	0	1.15	3.71	1.12	1.96
282	0	56	*1a/*1a(388A/A,521T/T)	E2/E3	0	0	0.89	5.38	0.73	2.68	1.61	0.82
283	0	48	*1b/*1b(388G/G,521T/T)	E3/E3	0	1	1.83	3.46	0.94	1.82	1.19	1.21
284	0	98	*1a/*1b(388A/G,521T/T)	E3/E3	0	1	0.9	3.22	1.06	1.59	1.05	0.49
285	0	24	*1a/*1b(388A/G,521T/T)	E3/E3	0	1	1.22	6.26	1.22	4.09	1.33	1.25
286	1	43	*1a/*1a(388A/A,521T/T)	E3/E3	0	0	1.23	3.49	1.05	1.76
287	1	39	*1b/*1b(388G/G,521T/T)	E3/E3	0	0	1.15	5.39	1.42	3.27
288	0	83	*1a/*1a(388A/A,521T/T)	E3/E3	0	1	0.72	2.83	0.95	1.09	0.93	0.38
289	0	49	*1b/*1b(388G/G,521T/T)	E3/E3	0	1	2.48	3.26	1.11	3.87	1.18	1.28
290	0	88	*1a/*1b(388A/G,521T/T)	E4/E4	0	1	0.91	2.65	0.91	1.11	0.89	0.48
291	0	47	*1b/*1b(388G/G,521T/T)	E3/E3	0	0	0.97	4.2	1.16	2.32
292	1	32	*1b/*1b(388G/G,521T/T)	E2/E3	0	0	0.9	3.43	1.25	1.53
293	0	72	*1a/*1b(388A/G,521T/T)	E2/E4	0	0	1.24	4.9	1.5	2.63	1.34	0.79
294	1	85	*1a/*1b(388A/G,521T/T)	E3/E3	0	1	0.59	3.46	0.93	2.08	0.8	0.61
295	1	78	*1b/*1b(388G/G,521T/T)	E3/E3	0	1	1.79	3.84	1.71	4.36	1.43	1.44
296	1	56	*1b/*1b(388G/G,521T/T)	E3/E4	0	1	0.82	5.34	1.39	3.39	1.24	1.03
297	0	48	*1b/*1b(388G/G,521T/T)	E3/E3	0	0	2.11	3.92	0.8	2.36	1.13
298	1	76	*1a/*1b(388A/G,521T/T)	E3/E3	0	1	0.67	5.47	1.96	2.41	1.68	0.77
299	1	83	*1b/*15(388G/G,521T/C)	E3/E3	0	0	1.97	3.08	0.78	1.46	0.98	0.6
300	1	56	*1b/*1b(388G/G,521T/T)	E3/E4	0	0	2.11	4.62	0.97	2.94	1.01	0.86
301	1	72	*1b/*1b(388G/G,521T/T)	E3/E3	0	1	1.02	2.49	1.09	0.75	1.08	0.32
302	0	86	*1b/*15(388G/G,521T/C)	E2/E3	0	1	1.67	4.61	1.27	2.38
303	1	50	*1b/*1b(388G/G,521T/T)	E3/E3	0	0	0.97	5.17	1.46	3.15
304	1	81	*1a/*1b(388A/G,521T/T)	E3/E4	0	1	1.22	6	1.91	3.36
305	0	79	*1b/*1b(388G/G,521T/T)	E3/E3	0	1	2.52	4.11	0.82	2.46	0.9	0.84
306	1	61	*1b/*1b(388G/G,521T/T)	E3/E3	0	1	2.15	4.06	1.02	2.09	1.12	0.79
307	1	61	*1a/*1b(388A/G,521T/T)	E3/E4	0	0	0.43	5.84	2.5	2.65
308	1	93	*1b/*1b(388G/G,521T/T)	E3/E4	0	1	6.37	6.07	1.15	3.29	1.13	1.06
309	0	56	*1b/*1b(388G/G,521T/T)	E3/E3	0	1	2.76	2.99	0.47	1.49	0.37
310	1	63	*1b/*1b(388G/G,521T/T)	E3/E3	0	0	0.94	4.57	1.38	2.59	1.34	0.82
311	0	73	*1b/*1b(388G/G,521T/T)	E3/E4	0	1	1.68	3.66	0.64	2.18	0.57	0.88
312	1	71	*1b/*1b(388G/G,521T/T)	E3/E3	0	1	1.07	4.52	1.47	2.26	1.41	0.73
313	0	84	*1b/*1b(388G/G,521T/T)	E3/E3	0	1	0.75	3.63	0.89	1.08	0.8	0.43
314	1	88	*1b/*1b(388G/G,521T/T)	E3/E4	0	1	1.31	3.76	0.89	2.12	0.89	0.66
315	0	72	*1b/*1b(388G/G,521T/T)	E3/E3	0	1	1.97	3.42	0.89	1.72
316	0	53	*1b/*1b(388G/G,521T/T)	E3/E3	0	1	1.91	3.38	1.06	3.67	0.96
317	1	57	*15/*15(388G/G,521C/C)	E3/E3	0	0	2.05	5.24	1.03	3.63	1.01	1.16
318	0	45	*1a/*1b(388A/G,521T/T)	E3/E3	0	0	2.02	5.42	0.98	3.53	1.04	1.14
319	1	57	*1a/*1b(388A/G,521T/T)	E3/E3	0	0	1.04	7.13	1.04	2.43	1.13	0.74
320	0	71	*1a/*1a(388A/A,521T/T)	E3/E4	0	0	1.13	7.3	0.36	7.03
321	0	44	*1a/*1b(388A/G,521T/T)	E3/E3	0	1	1.86	6.19	1.25	4.19
322	0	89	*1b/*1b(388G/G,521T/T)	E3/E3	0	1	0.86	3.38	0.84	1.98
323	0	36	*1a/*1a(388A/A,521T/T)	E3/E3	0	0	2.74	4.85	1.04	2.83	1.14	1
324	1	64	*1a/*1b(388A/G,521T/T)	E3/E3	0	1	2.47	3.94	1.1	4.47	1.08	1.74
325	1	43	*1b/*1b(388G/G,521T/T)	E3/E3	0	0	1.79	5.08	0.88	3.34	0.93	1.16
326	1	88	*1b/*1b(388G/G,521T/T)	E3/E3	0	1	0.78	2.44	0.83	0.88	0.84	0.31
327	1	95	*1a/*1b(388A/G,521T/T)	E3/E3	0	0	1.89	2.58	0.64	1.06	0.86	0.47
328	0	39	*1a/*1b(388A/G,521T/T)	E3/E4	0	0	2.89	4.55	1.32	2.56
329	0	60	*1a/*1b(388A/G,521T/T)	E3/E3	0	0	1.54	6.53	1.49	3.08
330	0	47	*1a/*1b(388A/G,521T/T)	E3/E3	0	1	1.03	3.83	0.94	1.83	1.11	1.52
331	1	82	*1a/*1b(388A/G,521T/T)	E2/E3	0	1	0.84	3.51	0.96	1.65	0.83	0.7
332	1	70	*1b/*1b(388G/G,521T/T)	E3/E3	0	0	2.27	8.8	1.52	5.39	1.35	2.18
333	1	35	*1b/*15(388G/G,521T/C)	E2/E4	0	0	0.56	5.02	1.6	2.82	1.23	0.94
334	0	30	*1b/*1b(388G/G,521T/T)	E3/E4	0	1	2.63	3.48	1.24	4.51
335	1	69	*1b/*15(388G/G,521T/C)	E3/E4	0	1	1.24	3.77	1.16	0.86	1.1	0.66
336	0	97	*1b/*15(388G/G,521T/C)	E3/E3	0	0	1.62	5.52	1.12	1.89	0.98	1.3
337	1	79	*1b/*1b(388G/G,521T/T)	E3/E3	0	0	1.44	5.4	1.05	3.57	1.03	1.16
338	1	42	*1b/*1b(388G/G,521T/T)	E3/E4	0	1	2	5.09	1.03	3.35
339	0	44	*1b/*1b(388G/G,521T/T)	E2/E2	0	1	1.61	3.84	1.12	1.46	1.1	0.61
340	1	93	*1b/*15(388G/G,521T/C)	E3/E4	0	1	1.91	3.7	1.1	1.81	1.15	0.7
341	0	83	*1b/*1b(388G/G,521T/T)	E3/E3	0	1	0.59	2.93	1.09	1.33	1.05	0.43
342	1	48	*1b/*15(388G/G,521T/C)	E3/E4	0	0	1.8	5.85	1.55	3.42	1.71	1.2
343	1	62	*1b/*1b(388G/G,521T/T)	E3/E3	0	0	1.81	5.63	0.97	3.72	1	1.26
344	0	92	*1b/*1b(388G/G,521T/T)	E3/E3	0	1	0.64	3.62	1.3	1.44	1.17
345	1	83	*1b/*15(388G/G,521T/C)	E3/E3	0	0	2.05	3.2	0.81	1.59	0.98	0.63
346	0	65	*1b/*15(388G/G,521T/C)	E3/E3	0	1	1.26	5.09	1.27	3.38	1.07	1.06
347	0	85	*1b/*1b(388G/G,521T/T)	E4/E4	0	0	0.59	2.86	0.74	1.82	0.73	0.57
348	0	52	*1b/*1b(388G/G,521T/T)	E3/E3	0	1	0.83	3.85	0.93	2.48	1	0.84
349	1	58	*1a/*1b(388A/G,521T/T)	E3/E3	0	1	0.79	5.08	1.46	3.08
350	1	45	*1b/*1b(388G/G,521T/T)	E3/E4	0	0	1.07	6.02	1.28	3.97
351	1	88	*1b/*1b(388G/G,521T/T)	E3/E4	0	1	1.42	4.19	0.99	2.42	0.98	0.85
352	0	70	*1b/*1b(388G/G,521T/T)	E2/E3	0	1	2.26	3.5	0.17	1.82
353	0	75	*1a/*1b(388A/G,521T/T)	E3/E3	0	0	0.73	3.88	1.4	1.96	1.17	0.63
354	1	70	*1a/*15(388A/G,521T/C)	E2/E3	0	1	2.14	5.77	1.51	2.89
355	0	56	*1a/*1b(388A/G,521T/T)	E3/E4	0	1	1.16	4.95	1.25	3.05	1.34	1.08
356	1	63	*1a/*1b(388A/G,521T/T)	E3/E3	0	0	2.12	7.2	1.4	4.51	1.12	1.56
357	0	82	*1b/*1b(388G/G,521T/T)	E3/E3	0	1	1	3.42	1.29	1.47	1.22	0.46
358	1	98	*1a/*15(388A/G,521T/C)	E3/E3	0	1	2.08	5.18	1.57	2.84	1.58	0.96
359	1	95	*1a/*1b(388A/G,521T/T)	E3/E3	0	0	1.4	2.26	0.6	1.07	0.78	0.5
360	0	41	*15/*15(388G/G,521C/C)	E3/E3	0	0	2.3	6.12	1.3	3.95	1.39	1.39
361	1	83	*1b/*1b(388G/G,521T/T)	E3/E4	0	1	0.77	3.8	1.14	1.87	1.21	0.56
362	1	51	*1a/*1a(388A/A,521T/T)	E2/E3	0	1	1.74	4.69	0.85	2.84	0.97	0.96
363	1	59	*1a/*1a(388A/A,521T/T)	E3/E3	0	1	2.28	7.18	1.46	4.35
364	1	71	*1b/*1b(388G/G,521T/T)	E2/E3	0	1	1.39	4.01	0.89	2.33
365	0	44	*1a/*1b(388A/G,521T/T)	E3/E4	0	0	0.94	5.06	1.39	3.11	1.31	1
366	1	93	*1b/*1b(388G/G,521T/T)	E3/E3	0	1	1.35	3.86	1.14	1.72	1.13	0.59
367	0	69	*1b/*1b(388G/G,521T/T)	E3/E3	0	0	0.96	4.7	1.01	3	1	0.93
368	1	46	*1a/*1b(388A/G,521T/T)	E3/E4	0	0	0.68	3.51	0.75	1.92	0.86	0.61
369	0	54	*1b/*15(388G/G,521T/C)	E3/E3	0	1	0.65	5.2	2.18	2.37	1.76	0.84
370	0	52	*1b/*15(388G/G,521T/C)	E3/E3	0	1	0.75	4.24	1.06	2.56	1	0.81
371	0	82	*1a/*1b(388A/G,521T/T)	E3/E3	0	0	0.61	3.61	1.27	1.88	0.63	0.29
372	0	38	*1a/*1b(388A/G,521T/T)	E3/E4	0	1	1.32	4.97	1.3	2.84
373	1	88	*1a/*1b(388A/G,521T/T)	E3/E4	0	1	1.03	6.34	1.49	3.87
374	1	85	*1a/*1b(388A/G,521T/T)	E3/E3	0	1	1.65	5.63	1.39	3.51	1.09	0.48
375	1	68	*1a/*1b(388A/G,521T/T)	E3/E3	0	0	0.59	2.54	0.94	1.05	0.95	1.08
376	1	62	*1b/*15(388G/G,521T/C)	E2/E3	0	0	1.22	4.73	1	2.98	1.48	0.92
377	0	90	*1a/*1b(388A/G,521T/T)	E2/E2	0	1	0.85	3.9	1.14	2.06	0.69	0.57
378	1	62	*1b/*15(388G/G,521T/C)	E3/E4	0	1	3.68	3.38	0.68	1.05	1.66	1.31
379	0	87	*1b/*15(388G/G,521T/C)	E4/E4	0	1	0.34	4.67	1.73	2.18	0.6	0.67
380	1	37	*1b/*1b(388G/G,521T/T)	E3/E4	0	1	0.99	4.58	0.64	3.52
381	1	76	*1b/*1b(388G/G,521T/T)	E3/E3	0	1	0.87	3.01	1.09	1.22	1.21	0.94
382	1	88	*1b/*1b(388G/G,521T/T)	E3/E3	0	1	1.73	4.5	1.59	1.75	0.94	0.35
383	0	50	*1b/*15(388G/G,521T/C)	E3/E3	0	1	1.84	6.91	1.47	4.27	0.99	0.56
384	1	59	*1b/*15(388G/G,521T/C)	E3/E3	0	1	2.16	4.59	0.74	2.76	1.39	0.7
385	1	97	*1a/*1b(388A/G,521T/T)	E3/E3	0	1	1.28	5.13	1.38	2.9	0.79	0.66
386	0	77	*1a/*1b(388A/G,521T/T)	E2/E3	0	0	1.68	3.42	0.79	1.65	0.84	0.42
387	0	82	*1b/*1b(388G/G,521T/T)	E3/E4	0	1	0.8	4.7	1.6	2.42	1.42	1.24
388	1	93	*1b/*1b(388G/G,521T/T)	E3/E3	0	1	2.53	3.46	0.57	1.76	1.29	0.42
389	1	59	*1a/*1a(388A/A,521T/T)	E3/E3	0	1	0.68	4.83	0.85	3.49	0.57	0.82
390	0	71	*1a/*1b(388A/G,521T/T)	E3/E3	0	0	0.73	4.1	0.91	2.74	1.04	0.98
391	0	79	*1a/*15(388A/G,521T/C)	E4/E4	0	1	1	3.6	1.08	1.62	0.63	0.5
392	1	90	*1b/*1b(388G/G,521T/T)	E3/E4	0	1	0.97	4.32	0.94	2.8	0.91	0.87
393	0	71	*1a/*1b(388A/G,521T/T)	E3/E4	0	1	1.17	4.23	1.13	2.61	1.18	1.78
394	1	87	*1b/*1b(388G/G,521T/T)	E3/E3	0	1	1.25	5.31	1.87	2.39	0.85	0.47
395	0	82	*1b/*1b(388G/G,521T/T)	E3/E3	0	1	2.69	3.6	0.94	1.48	1.39	0.45
396	1	80	*1b/*15(388G/G,521T/C)	E3/E4	0	1	1.8	3.6	0.77	1.74	0.91	0.81
397	1	83	*1b/*15(388G/G,521T/C)	E3/E3	0	0	1.31	4.5	0.77	3.7	1.11	0.54
398	0	86	*1b/*1b(388G/G,521T/T)	E3/E3	0	1	1.21	4.24	1.75	2.14	1.11	0.91
399	1	82	*1a/*15(388A/G,521T/C)	E4/E4	0	0	1.27	3.56	1.24	1.63
400	1	89	*1b/*1b(388G/G,521T/T)	E3/E4	0	1	0.89	4.51	1.07	2.61
401	1	94	*1b/*15(388G/G,521T/C)	E3/E4	0	1	2.74	7.3	1.19	4.92	1.23	1.23
402	0	99	*1a/*1b(388A/G,521T/T)	E3/E4	0	1	4.91	5.88	1	1.66	1.16	0.58
403	0	54	*1a/*1a(388A/A,521T/T)	E3/E3	0	1	0.26	2.95	1.33	1.6
404	1	62	*1b/*15(388G/G,521T/C)	E3/E4	0	1	0.82	5.11	1.26	3.38	1.39	0.86
405	1	87	*1b/*1b(388G/G,521T/T)	E3/E3	0	1	0.87	5.46	1.33	4.01	1.29	0.39
406	1	90	*1b/*1b(388G/G,521T/T)	E3/E4	0	1	1.08	4.05	1.07	2.94	0.88	0.67
407	1	57	*1b/*15(388G/G,521T/C)	E3/E3	0	1	1.13	3.17	0.78	1.93	0.69	0.79
408	0	85	*1b/*1b(388G/G,521T/T)	E3/E3	0	1	1.21	4.24	1.75	2.14	1.15	1.05
409	1	82	*1b/*15(388G/G,521T/C)	E3/E3	0	0	1.31	4.5	0.77	3.7	1.2	0.62
410	0	53	*1b/*15(388G/G,521T/C)	E3/E3	0	0	1.16	3.39	0.69	2.46	1.03	0.98
411	1	52	*1b/*1b(388G/G,521T/T)	E3/E3	0	1	1.24	4.94	1.19	3.61	0.92	1.17
412	1	89	*1a/*1b(388A/G,521T/T)	E3/E4	0	1	0.88	4.68	1.13	3.38
413	0	57	*1a/*1b(388A/G,521T/T)	E3/E3	0	1	1.11	3.16	1.43	1.33
414	1	80	*1b/*1b(388G/G,521T/T)	E3/E4	0	1	3.24	4.19	1.09	1.94	0.86	0.58
415	0	73	*1b/*1b(388G/G,521T/T)	E3/E3	0	1	3.25	5.91	1.43	4.39	0.96	0.66
416	1	82	*1b/*1b(388G/G,521T/T)	E3/E4	0	1	3.24	4.19	1.09	1.94
417	1	89	*1b/*1b(388G/G,521T/T)	E3/E3	0	1	0.71	6.15	2.16	3.76
418	0	41	*1a/*1b(388A/G,521T/T)	E3/E3	0	1	0.89	3.97	1.12	2.42
419	1	51	*1a/*1a(388A/A,521T/T)	E2/E3	0	0	0.79	2.76	0.96	1.44	1.03	1.15
420	1	59	*1b/*1b(388G/G,521T/T)	E2/E4	0	0	1.71	3.33	0.83	1.79	1.01	0.64
421	0	83	*1b/*1b(388G/G,521T/T)	E3/E4	0	1	1.2	3.94	0.73	2.93
422	0	63	*1a/*1b(388A/G,521T/T)	E3/E4	0	0	0.6	3.03	1.2	1.48	0.91	0.9
423	1	48	*1b/*1b(388G/G,521T/T)	E3/E3	0	0	1.07	4.43	1.28	2.68	1.27	0.8
424	1	78	*1b/*1b(388G/G,521T/T)	E2/E4	0	1	1.25	3.63	0.9	2.51	1.01	0.79
425	1	94	*1b/*1b(388G/G,521T/T)	E3/E3	0	1	0.8	4.9	1.95	2.55	1.02	0.34
426	1	70	*1b/*1b(388G/G,521T/T)	E3/E3	0	1	1.21	3.77	0.61	2.48	0.87	1.3
427	1	58	*1a/*1b(388A/G,521T/T)	E3/E3	0	1	1.56	4.84	1.06	3.44	0.93	0.67
428	1	89	*1b/*1b(388G/G,521T/T)	E3/E3	0	1	1.69	2.79	0.7	1.5	1.22	0.68
429	1	44	*1b/*1b(388G/G,521T/T)	E2/E3	0	0	1.42	3.91	1.24	2.47	1.11	0.6
430	0	85	*1a/*1b(388A/G,521T/T)	E3/E3	0	1	1.23	4.41	1.26	2.54	0.73	0.55
431	0	53	*1a/*1b(388A/G,521T/T)	E3/E4	0	0	1.38	5.34	1.65	2.58	0.71	0.73
432	0	57	*1b/*1b(388G/G,521T/T)	E3/E3	0	1	1.41	3.35	0.79	2.05	0.91	0.74
433	1	83	*1b/*1b(388G/G,521T/T)	E2/E3	0	0	1.16	4.99	1.25	3.69	1.08	0.49
434	1	64	*1a/*1b(388A/G,521T/T)	E3/E3	0	0	1	5.93	1.61	4.04	0.86	1.43
435	1	90	*1b/*1b(388G/G,521T/T)	E3/E3	0	1	0.37	2.43	1.18	0.88
436	0	52	*1a/*1b(388A/G,521T/T)	E3/E3	0	1	1.84	3.91	1.11	2.25	1.03	0.86
437	1	87	*1a/*1a(388A/A,521T/T)	E3/E3	0	0	1.32	3.95	0.68	2.74	1.11	0.45
438	1	98	*1a/*1b(388A/G,521T/T)	E3/E3	0	1	0.86	5.2	2.16	2.46
439	1	96	*1b/*1b(388G/G,521T/T)	E2/E4	0	1	0.85	4.16	1.43	2.36
440	0	92	*1b/*1b(388G/G,521T/T)	E3/E3	0	1	0.54	2.43	0.96	1.2
441	0	56	*1a/*1b(388A/G,521T/T)	E3/E3	0	1	1.45	4.66	1.39	2.71	0.79	0.78
442	1	81	*1b/*15(388G/G,521T/C)	E3/E3	0	0	0.67	3.59	1.16	2.16
443	0	84	*1a/*1b(388A/G,521T/T)	E3/E3	0	1	0.92	4.26	1.12	2.94	0.91	0.81
444	1	74	*1b/*1b(388G/G,521T/T)	E3/E3	0	1	0.63	3.57	1.13	2.21
445	1	84	*1b/*15(388G/G,521T/C)	E3/E3	0	0	1.02	2.42	0.61	1.4	0.95	0.48
446	0	86	*1b/*1b(388G/G,521T/T)	E3/E3	0	1	1.01	2.86	0.53	2.07	1.12	1.01
447	0	60	*1a/*1b(388A/G,521T/T)	E3/E3	0	0	1.11	4.89	1.1	3.54	1.02	1.06
448	1	90	*1b/*1b(388G/G,521T/T)	E3/E3	0	1	0.95	5.1	1.8	3.13	0.91	0.53
449	0	76	*1a/*1b(388A/G,521T/T)	E2/E3	0	1	0.79	3.56	0.87	2.41	0.85	0.73
450	1	60	*1b/*1b(388G/G,521T/T)	E2/E3	0	0	0.88	3.25	1.21	1.51
451	0	84	*1b/*1b(388G/G,521T/T)	E3/E4	0	1	1.07	3.43	1.26	1.65	0.82	0.88
452	1	73	*1b/*15(388G/G,521T/C)	E3/E3	0	0	1.06	3.11	0.81	1.9
453	1	83	*1a/*1b(388A/G,521T/T)	E3/E4	0	1	3.1	5.58	1.24	3.3	0.83	0.58
454	0	69	*1b/*1b(388G/G,521T/T)	E3/E3	0	1	0.75	3.97	0.9	2.83
455	0	51	*1b/*1b(388G/G,521T/T)	E3/E3	0	1	1.52	3.45	0.7	2.28	1.1	0.51
456	1	76	*1b/*1b(388G/G,521T/T)	E3/E3	0	1	3.69	6.21	1.16	4.03	1.14	1.04
457	1	58	*15/*15(388G/G,521C/C)	E3/E3	0	1	1.74	4.34	0.98	2.77	1.42	1.66
458	0	79	*1b/*1b(388G/G,521T/T)	E3/E3	0	1	0.42	2.88	1.21	1.35	0.6	0.43
459	1	67	*1a/*15(388A/G,521T/C)	E3/E3	0	0	0.77	5.3	1.56	3.34	1.2	1.04
460	1	94	*1b/*15(388G/G,521T/C)	E3/E4	0	1	2.41	5.72	1.11	3.9	1.15	0.43
461	1	84	*1b/*1b(388G/G,521T/T)	E3/E4	0	1	1.69	3.62	0.79	2.25	1.02	0.58
462	0	86	*1b/*1b(388G/G,521T/T)	E3/E3	0	1	0.64	4.4	1.35	2.45
463	1	84	*1b/*15(388G/G,521T/C)	E3/E3	0	0	1.65	3.52	0.73	2.07	0.88	0.52
464	1	44	*1a/*1b(388A/G,521T/T)	E3/E3	0	0	2.08	5.69	0.96	3.96	1.11	0.78
465	1	73	*1b/*15(388G/G,521T/C)	E3/E3	0	0	1.41	2.73	0.78	1.01
466	1	78	*1b/*1b(388G/G,521T/T)	E3/E3	0	1	0.99	2.93	0.72	1.84
467	0	60	*1a/*15(388A/G,521T/C)	E3/E3	0	1	1.25	4.99	1.26	3.56
468	0	90	*1b/*1b(388G/G,521T/T)	E3/E3	0	1	1.34	3.92	0.87	2.54
469	0	50	*1b/*1b(388G/G,521T/T)	E3/E3	0	0	0.96	3.13	0.98	1.69
470	0	59	*1b/*15(388G/G,521T/C)	E3/E3	0	1	1.63	6.07	1.13	4.72	1.02	1.05
471	1	90	*1b/*1b(388G/G,521T/T)	E3/E3	0	1	1.88	3.84	0.94	1.87	0.9	0.77
472	0	66	*1b/*1b(388G/G,521T/T)	E3/E3	0	0	1.43	6.04	1.51	3.7
473	1	99	*1a/*1b(388A/G,521T/T)	E3/E3	0	1	1.93	3.99	0.82	2.58
474	0	40	*1a/*1b(388A/G,521T/T)	E3/E3	0	0	0.57	3.87	1.22	2.23	1.62	1.28
475	0	65	*1a/*1a(388A/A,521T/T)	E3/E4	0	1	1.09	5.13	1.13	3.68	0.83	0.53
476	1	85	*1a/*1b(388A/G,521T/T)	E3/E3	0	1	2.52	4.54	0.67	2.99	0.96	0.63
477	0	61	*1b/*1b(388G/G,521T/T)	E3/E3	0	1	1.91	4.88	0.86	2.93
478	1	100	*1b/*15(388G/G,521T/C)	E3/E3	0	1	0.73	2.87	1.13	1.12	0.92	0.62
479	0	55	*1b/*15(388G/G,521T/C)	E3/E3	0	0	0.93	4.63	1.16	2.91	0.79	1.1
480	1	44	*1b/*1b(388G/G,521T/T)	E3/E3	0	1	1.36	4.78	1.1	2.46
481	1	94	*1b/*1b(388G/G,521T/T)	E3/E3	0	1	1.22	4.42	0.87	3.03	1.04	0.34
482	0	35	*1b/*15(388G/G,521T/C)	E3/E4	0	0	0.68	3.85	1.13	2.27
483	0	60	*1b/*1b(388G/G,521T/T)	E2/E3	0	0	0.7	3.82	1.13	2.19	0.71	1.65
484	1	62	*1a/*1b(388A/G,521T/T)	E3/E4	0	0	1.07	2.24	0.61	0.9	1.16	1.3
485	1	51	*1b/*1b(388G/G,521T/T)	E3/E4	0	1	0.51	4.88	1.4	2.82	0.84	0.99
486	0	67	*1b/*15(388G/G,521T/C)	E4/E4	0	0	0.95	3.83	1.1	2.32	0.99	1.21
487	1	85	*1b/*1b(388G/G,521T/T)	E3/E3	0	0	0.51	2.81	0.82	1.43
488	1	89	*1a/*1b(388A/G,521T/T)	E3/E4	0	1	0.89	3.66	1.09	1.99	1.05	1.36
489	0	86	*1b/*1b(388G/G,521T/T)	E3/E3	0	1	1.12	4.74	1.27	2.73	1.06	1.03
490	1	84	*1b/*15(388G/G,521T/C)	E3/E3	0	0	0.75	4.1	1.27	2.56	1.03	0.62
491	1	96	*1b/*15(388G/G,521T/C)	E2/E4	0	1	4.05	6.99	1.31	4.95
492	1	66	*1b/*1b(388G/G,521T/T)	E3/E3	0	0	1.91	3.32	0.54	2.4
493	1	46	*1a/*1b(388A/G,521T/T)	E3/E3	0	0	2.73	5.88	1.14	3.88
494	0	46	*1a/*1b(388A/G,521T/T)	E3/E3	0	1	1.11	2.73	0.74	1.46
495	0	66	*1b/*1b(388G/G,521T/T)	E3/E3	0	0	0.82	4.15	1.08	2.37
496	1	73	*1b/*15(388G/G,521T/C)	E3/E3	0	0	1.28	4.48	2.28	1.71
497	1	55	*1a/*1b(388A/G,521T/T)	E3/E3	0	0	0.92	3.07	0.5	2.12	1.21	0.65
498	0	57	*1a/*15(388A/G,521T/C)	E2/E3	0	1	2.34	5.79	1.07	3.7	0.94	0.91
499	1	59	*1b/*15(388G/G,521T/C)	E3/E3	0	0	1.27	5.66	1.63	3.61	1.17	1.38
500	1	58	*1b/*1b(388G/G,521T/T)	E3/E4	0	0	1.48	2.73	0.53	1.51
501	0	70	*1b/*15(388G/G,521T/C)	E3/E3	0	1	1.12	3.73	1.13	1.93	1.25	0.87
502	1	67	*1a/*1b(388A/G,521T/T)	E3/E3	0	1	0.88	6.53	2.76	3.38	1.18	0.84
503	1	56	*1a/*1b(388A/G,521T/T)	E3/E3	0	0	0.87	4.14	1.12	2.74	0.86	0.74
504	0	62	*1b/*1b(388G/G,521T/T)	E2/E3	0	1	4.79	10.17	0.85	6.66	0.95	0.45
505	1	79	*1b/*1b(388G/G,521T/T)	E3/E3	0	1	1.8	3.39	1.39	1.54	1.6	0.79
506	0	55	*1b/*1b(388G/G,521T/T)	E3/E3	0	0	1.18	3.48	1	1.82
507	0	56	*1b/*1b(388G/G,521T/T)	E3/E3	0	0	0.81	3.85	1.37	1.68	1.14	0.83
508	0	49	*1a/*1b(388A/G,521T/T)	E3/E3	0	0	0.94	4.02	1.24	2.03	1.12	0.47
509	1	87	*1b/*1b(388G/G,521T/T)	E3/E3	0	1	1.45	4.2	1.01	2.31	0.95	0.4
510	0	27	*1b/*1b(388G/G,521T/T)	E3/E3	0	0	1.69	5.38	0.85	3.78	1.1	0.98
511	1	56	*1a/*1b(388A/G,521T/T)	E3/E4	0	0	2.26	4.93	0.85	2.79	1.08	0.99
512	0	41	*1a/*1b(388A/G,521T/T)	E3/E4	0	0	1.53	4.74	0.9	3.01	0.94	0.65
513	1	85	*1a/*1b(388A/G,521T/T)	E3/E3	0	1	2.82	4.69	1	2.63	0.86	0.71
514	0	52	*1b/*15(388G/G,521T/C)	E3/E3	0	0	0.8	3.16	1.14	1.36	1.39	0.75
515	1	76	*1a/*1b(388A/G,521T/T)	E3/E4	0	0	5.41	6.69	1.24	2.8	0.97	0.52
516	1	77	*1b/*1b(388G/G,521T/T)	E2/E3	0	1	1.09	6.08	0.84	3.57
517	1	70	*1a/*1b(388A/G,521T/T)	E2/E4	0	0	4.04	4.85	0.9	2.04
518	1	58	*1a/*1b(388A/G,521T/T)	E3/E3	0	0	1.9	5.34	1.34	3.25	1.37	1.15
519	0	60	*1a/*1b(388A/G,521T/T)	E3/E3	0	0	3.95	4.61	0.8	2.74	1.95	0.69
520	0	27	*1b/*1b(388G/G,521T/T)	E3/E3	0	0	1.58	3.14	0.59	2.05	1.27	1.08
521	0	56	*1b/*1b(388G/G,521T/T)	E4/E4	0	0	0.94	4.2	1.03	2.49	0.95	1.35
522	0	54	*1b/*1b(388G/G,521T/T)	E3/E3	0	0	1.99	4.29	0.83	2.7	1.41	0.96
523	0	67	*1a/*1a(388A/A,521T/T)	E3/E3	0	0	0.9	2.27	0.75	0.97	0.6	0.88
524	1	90	*1b/*1b(388G/G,521T/T)	E3/E3	0	1	0.93	2.89	0.83	1.32	1.07	0.52
525	1	99	*1a/*1b(388A/G,521T/T)	E3/E3	0	1	1.51	5.84	1.26	3.84	0.91	1.32
526	0	67	*1a/*1b(388A/G,521T/T)	E3/E4	0	1	0.78	3.32	0.81	2.02	0.83	0.98
527	0	82	*1a/*15(388A/G,521T/C)	E2/E3	0	1	1.49	3.25	0.78	1.66	0.45	0.39
528	1	78	*1a/*1a(388A/A,521T/T)	E4/E4	0	1	0.95	2.12	0.49	1.12
529	0	47	*1a/*1b(388A/G,521T/T)	E3/E3	0	0	1.69	3.77	0.65	2.51
530	1	65	*1a/*1b(388A/G,521T/T)	E3/E3	0	1	0.87	4.92	1.3	3.12
531	1	89	*1b/*1b(388G/G,521T/T)	E2/E3	0	1	1.12	2.93	0.75	1.57	0.95	0.86
532	0	73	*1a/*1b(388A/G,521T/T)	E3/E3	0	1	1.5	5.63	1.47	3.47	0.75	0.34
533	0	73	*1a/*1b(388A/G,521T/T)	E2/E3	0	1	0.01	1.06	0.63	0.34	1.1	0.54
534	1	57	*15/*15(388G/G,521C/C)	E3/E3	0	0	2.04	4.92	1.29	2.89	1.48	0.96
535	1	92	*1b/*15(388G/G,521T/C)	E4/E4	0	1	1.64	2.66	0.84	1.17	1.16	1.15
536	0	93	*1b/*1b(388G/G,521T/T)	E3/E3	0	0	1.19	3.73	0.79	2.26	0.56	1.16
537	1	39	*1b/*1b(388G/G,521T/T)	E3/E3	0	0	0.87	2.98	1.24	1.15	1.08	0.78
538	0	93	*1b/*1b(388G/G,521T/T)	E3/E3	0	1	1.02	4.02	0.71	2.94	1.29	0.44
539	1	64	*1a/*1b(388A/G,521T/T)	E3/E3	0	1	2.39	4.95	0.99	2.88
540	0	70	*1a/*1b(388A/G,521T/T)	E2/E3	0	0	0.85	3.35	1.43	1.22
541	0	67	*1b/*1b(388G/G,521T/T)	E3/E3	0	0	0.92	3.24	1.4	1.11
542	1	84	*1b/*1b(388G/G,521T/T)	E3/E4	0	1	0.97	3.61	1.12	2.13
543	1	53	*1a/*1a(388A/A,521T/T)	E3/E4	0	0	0.51	3.71	1.11	1.78	1.45	0.77
544	1	79	*1a/*1b(388A/G,521T/T)	E3/E3	0	1	0.56	3.48	1.61	1.27	0.88	0.75
545	0	58	*1b/*1b(388G/G,521T/T)	E3/E4	0	1	1.76	4.02	0.95	2.23
546	1	69	*1b/*15(388G/G,521T/C)	E3/E4	0	0	1.63	5.05	0.99	3.34	1.15	0.94
547	1	69	*1a/*1a(388A/A,521T/T)	E3/E3	0	0	1.75	5.95	1.35	3.56
548	0	31	*1b/*1b(388G/G,521T/T)	E3/E3	0	1	0.48	2.92	0.99	1.42	1.15	1.01
549	1	44	*1a/*1a(388A/A,521T/T)	E3/E3	0	0	0.65	4.06	1.4	2.22	1.05	0.6
550	1	86	*1a/*1b(388A/G,521T/T)	E3/E3	0	1	2.64	7.45	0.25	6.25	0.95	0.73
551	0	80	*1b/*1b(388G/G,521T/T)	E3/E3	0	0	2.16	4.84	1.11	3.12
552	0	68	*1b/*15(388G/G,521T/C)	E3/E3	0	1	0.78	4.96	1.71	2.25
553	1	65	*1b/*1b(388G/G,521T/T)	E3/E3	0	1	0.84	3.83	1.17	1.88	0.97	0.47
554	0	57	*1a/*1b(388A/G,521T/T)	E3/E3	0	1	1.64	4.92	0.86	3.7
555	0	37	*1b/*1b(388G/G,521T/T)	E3/E3	0	1	0.74	3.83	2.06	0.75
556	1	57	*1a/*1b(388A/G,521T/T)	E3/E4	0	1	1.49	4.5	1.12	2.71	0.97	1.15
557	1	47	*1a/*1b(388A/G,521T/T)	E3/E3	0	0	1.14	4.07	1.28	2.23
558	1	94	*1b/*1b(388G/G,521T/T)	E3/E3	0	1	0.79	3.13	0.6	2.18	1.04	0.28
559	0	60	*1b/*15(388G/G,521T/C)	E3/E3	0	0	0.8	2.23	0.83	0.69	1.03	0.9
560	0	71	*1b/*1b(388G/G,521T/T)	E3/E3	0	1	2.52	5.45	0.96	3.62
561	1	51	*1a/*15(388A/G,521T/C)	E2/E3	0	1	1.41	2.67	0.83	1.29	1.06	0.99
562	0	44	*1b/*15(388G/G,521T/C)	E3/E3	0	0	0.73	6.33	2.4	3.49	1.33	0.88
563	0	63	*1a/*15(388A/G,521T/C)	E3/E3	0	0	1.95	4.16	1.02	2.62	1.16	0.82
564	1	72	*1b/*15(388G/G,521T/C)	E3/E4	0	1	0.55	3.2	1.33	1.36
565	1	76	*1a/*1b(388A/G,521T/T)	E2/E3	0	0	0.65	3	1.19	1.49
566	0	58	*1a/*1b(388A/G,521T/T)	E3/E3	0	0	1.33	3.86	1.02	2.29	1.1	1.72
567	1	73	*1b/*1b(388G/G,521T/T)	E3/E3	0	1	1.08	4.75	1.29	3.09	1.37	0.88
568	0	66	*1a/*1b(388A/G,521T/T)	E2/E3	0	1	1.76	4.73	0.71	3.4	1.18	0.84
569	1	81	*1b/*1b(388G/G,521T/T)	E3/E4	0	1	1.4	3.38	0.76	1.9
570	1	70	*1a/*1b(388A/G,521T/T)	E2/E3	0	1	1.26	3.43	1.09	2.3	1.38	0.94
571	1	79	*1a/*1a(388A/A,521T/T)	E3/E3	0	0	0.9	5.07	1	3.32
572	1	81	*1b/*1b(388G/G,521T/T)	E3/E3	0	1	0.85	3.96	0.89	2.36
573	1	96	*1b/*1b(388G/G,521T/T)	E2/E4	0	1	1.03	4.27	1.64	1.88	0.92	0.66
574	0	79	*1b/*1b(388G/G,521T/T)	E3/E4	0	1	1.07	4.28	0.97	2.59	1.33	0.63
575	1	58	*1a/*1b(388A/G,521T/T)	E3/E3	0	0	1.37	5.54	1.25	3.71
576	1	70	*1b/*15(388G/G,521T/C)	E3/E3	0	0	2.59	4.72	0.96	3.05	1	1.32
577	0	51	*1a/*1b(388A/G,521T/T)	E3/E4	0	0	1.14	4.88	1.23	3.2	1.29	1.31
578	0	67	*1a/*1b(388A/G,521T/T)	E3/E3	0	1	0.69	4.1	1.66	2.3	0.57	0.45
579	0	52	*1b/*1b(388G/G,521T/T)	E3/E3	0	0	1.33	4.12	1.12	2.44
580	0	61	*1a/*1b(388A/G,521T/T)	E3/E3	0	0	0.93	4.15	1	2.66	0.57	0.45
581	0	67	*1b/*1b(388G/G,521T/T)	E3/E3	0	0	1.3	5.48	1.35	3.75	1.51	0.88
582	1	62	*1b/*1b(388G/G,521T/T)	E3/E3	0	0	0.77	4.5	1.39	2.37	1.49	1.36
583	1	62	*1b/*1b(388G/G,521T/T)	E3/E4	0	0	2.02	5.79	1.14	4.04	1.73	1.18
584	1	91	*1b/*15(388G/G,521T/C)	E4/E4	0	1	2.06	6.2	1.33	4.16	1.23	0.67
585	0	87	*1b/*15(388G/G,521T/C)	E3/E3	0	1	1.4	3.73	1.05	2.03	1.14	1.13
586	0	69	*1b/*1b(388G/G,521T/T)	E3/E4	0	0	1.18	3.35	0.69	1.88	1.09	0.49
587	0	51	*1b/*1b(388G/G,521T/T)	E3/E3	0	0	1.09	4.28	0.9	2.42	0.46	0.5
588	0	93	*1b/*1b(388G/G,521T/T)	E3/E3	0	1	1.76	4.27	1.07	2.4	0.98	0.75
589	1	85	*1b/*1b(388G/G,521T/T)	E3/E4	0	1	2.67	4.62	1.02	2.74	0.86	0.68
590	0	61	*1a/*1b(388A/G,521T/T)	E3/E3	0	0	3.81	5.01	1.78	3.06
591	1	75	*1a/*1b(388A/G,521T/T)	E3/E3	0	1	0.46	4.41	1.7	2.04	1.32	1.03
592	0	54	*1b/*1b(388G/G,521T/T)	E2/E2	0	0	2.21	4.41	0.91	2.33
593	1	72	*1b/*1b(388G/G,521T/T)	E2/E3	0	0	0.7	4.25	1.06	2.34	1.23	0.56
594	0	59	*1b/*1b(388G/G,521T/T)	E3/E3	0	0	1.07	3.5	0.78	1.86	1.39	1.09
595	1	58	*1b/*1b(388G/G,521T/T)	E3/E4	0	0	0.79	3.72	1.31	1.78
596	0	56	*1b/*1b(388G/G,521T/T)	E2/E3	0	1	1.03	4.04	1.24	2.16	1.03	0.82
597	1	96	*1b/*1b(388G/G,521T/T)	E2/E4	0	1	1.28	2.39	0.76	0.93
598	0	63	*1a/*1b(388A/G,521T/T)	E3/E3	0	0	2.5	4.35	1.19	2.38	1	1.15
599	1	64	*1b/*1b(388G/G,521T/T)	E3/E3	0	0	2.25	5.43	0.81	2.96
600	1	77	*1b/*15(388G/G,521T/C)	E3/E3	0	0	0.56	2.62	1.18	0.99
601	1	99	*1a/*1b(388A/G,521T/T)	E3/E3	0	1	1.46	5.63	1.11	3.6	1.01	1.29
602	1	89	*1b/*1b(388G/G,521T/T)	E3/E4	0	1	0.85	2.41	0.81	1.09
603	0	81	*1b/*1b(388G/G,521T/T)	E3/E3	0	1	0.51	4.46	2.37	1.42	0.86	0.93
604	1	83	*1b/*15(388G/G,521T/C)	E3/E3	0	1	1.78	5	1.33	2.81
605	0	77	*1b/*1b(388G/G,521T/T)	E3/E3	0	0	1.52	6.3	2.04	3.33
606	1	86	*1a/*1b(388A/G,521T/T)	E3/E3	0	1	1.85	4.12	0.87	2.34	0.99	0.76
607	1	81	*1a/*1b(388A/G,521T/T)	E3/E4	0	1	0.47	2.41	0.8	1.13
608	1	76	*1a/*1b(388A/G,521T/T)	E2/E3	0	0	0.65	3.45	0.9	2.01
609	0	87	*1b/*15(388G/G,521T/C)	E3/E3	0	1	1.48	7.34	1.27	5.45	1.45	1.07
610	1	94	*1b/*1b(388G/G,521T/T)	E3/E4	0	1	0.59	4.17	1.51	1.99	1.07	0.28
611	0	64	*1b/*1b(388G/G,521T/T)	E3/E3	0	0	0.97	4.7	1.39	2.68	1.57	1
612	0	52	*1b/*1b(388G/G,521T/T)	E3/E3	0	0	0.42	2.43	0.96	1.04	0.43	0.44
613	0	89	*1b/*1b(388G/G,521T/T)	E3/E3	0	0	1.54	5.76	1.23	3.6
614	1	55	*1b/*1b(388G/G,521T/T)	E3/E3	0	0	1.53	2.37	0.5	1.36	1.12	1.02
615	0	64	*1b/*1b(388G/G,521T/T)	E3/E3	0	0	1.7	4.17	1.21	2.15
616	1	88	*1a/*1b(388A/G,521T/T)	E3/E4	0	1	0.96	3.39	1	1.99
617	1	89	*1b/*1b(388G/G,521T/T)	E3/E3	0	1	0.78	3.5	1.21	1.66	0.39	0.39
618	0	78	*1a/*1b(388A/G,521T/T)	E2/E4	0	0	1.75	3.69	1.08	1.71	0.82	0.4
619	0	89	*1b/*1b(388G/G,521T/T)	E3/E3	0	1	0.5	2.81	1.07	1.24	0.92	0.73
620	1	83	*1a/*15(388A/G,521T/C)	E4/E4	0	0	1.97	5.13	1.25	3.22	1.07	0.77
621	1	90	*1b/*1b(388G/G,521T/T)	E3/E3	0	1	1.71	6.22	1.76	4.06	1.15	0.5
622	0	30	*1b/*1b(388G/G,521T/T)	E3/E3	0	0	0.91	3.69	1.16	2.3	1.07	1.2
623	0	88	*1b/*1b(388G/G,521T/T)	E3/E3	0	1	0.86	4.12	1.15	2.64	0.83	0.58
624	1	72	*1b/*1b(388G/G,521T/T)	E3/E3	0	1	0.92	2.88	0.91	1.7
625	0	77	*1b/*1b(388G/G,521T/T)	E3/E3	0	1	1.07	3.49	1.47	1.71	1.09	1.11
626	1	83	*1a/*15(388A/G,521T/C)	E4/E4	0	0	0.99	4.73	1.41	2.83	1.12	0.87
627	0	58	*1a/*15(388A/G,521T/C)	E2/E3	0	0	0.96	2.68	0.95	1.41	0.96	0.47
628	0	64	*1b/*1b(388G/G,521T/T)	E3/E3	0	0	1.87	3.93	0.72	2.76
629	1	93	*1b/*1b(388G/G,521T/T)	E3/E4	0	1	1.24	4.77	0.87	2.76	0.87	0.64
630	0	65	*1a/*1a(388A/A,521T/T)	E3/E3	0	1	0.58	4.87	1.41	3.14
631	0	49	*1a/*1a(388A/A,521T/T)	E3/E3	0	0	1.85	4.69	0.91	3.25	0.97	1.05
632	1	86	*1a/*1b(388A/G,521T/T)	E3/E3	0	1	0.86	4.11	0.84	2.97	0.84	0.93
633	0	89	*1b/*1b(388G/G,521T/T)	E3/E3	0	0	0.92	2.84	0.55	1.91	0.49	0.58
634	0	64	*1b/*15(388G/G,521T/C)	E3/E3	0	1	1.26	4.43	1.49	2.56
635	0	93	*1b/*1b(388G/G,521T/T)	E3/E3	0	1	1.31	3.66	1.17	1.67	0.96	0.7
636	1	78	*1a/*1b(388A/G,521T/T)	E3/E3	0	1	0.74	3.21	0.9	2.02
637	0	82	*1a/*15(388A/G,521T/C)	E2/E3	0	1	0.68	3.27	1.2	1.39	0.86	0.44
638	1	65	*1a/*1b(388A/G,521T/T)	E3/E3	0	1	0.75	3.43	1.43	1.6	1.37	0.52
639	1	55	*1b/*15(388G/G,521T/C)	E2/E3	0	0	1.49	5.9	1.34	3.9
640	0	73	*1a/*1b(388A/G,521T/T)	E3/E3	0	0	1.22	4.29	1.11	3.03	1.26	0.92
641	0	84	*1b/*1b(388G/G,521T/T)	E3/E3	0	1	0.7	4.73	1.43	3.05	1.21	0.82
642	0	47	*1a/*1b(388A/G,521T/T)	E4/E4	0	0	1.2	4.44	0.85	3.16
643	1	88	*1a/*1b(388A/G,521T/T)	E3/E4	0	1	0.67	3.26	1.19	1.58
644	1	45	*1b/*15(388G/G,521T/C)	E3/E3	0	0	1.43	6.21	1.3	4.91
645	0	83	*1a/*1b(388A/G,521T/T)	E3/E3	0	0	0.97	5.5	1.32	3.9	1.4	1.12
646	1	64	*1a/*1b(388A/G,521T/T)	E3/E3	0	1	3.11	7.45	1.24	1.22
647	1	70	*1a/*1b(388A/G,521T/T)	E3/E4	0	0	1.74	4.88	1.24	3.28
648	1	85	*1b/*1b(388G/G,521T/T)	E3/E4	0	1	4.91	3.62	0.34	1.96	0.54	1.07
649	1	80	*1a/*1b(388A/G,521T/T)	E3/E3	0	1	0.93	3.24	1.13	1.89
650	0	59	*1a/*1b(388A/G,521T/T)	E2/E3	0	1	3.31	4.91	0.76	2.39	1.12	0.91
651	0	71	*1b/*1b(388G/G,521T/T)	E3/E3	0	1	1.29	3.79	0.89	2.49	1.09	0.77
652	0	70	*1b/*1b(388G/G,521T/T)	E3/E3	0	1	0.61	3.5	0.95	1.98	1.35	0.77
653	1	72	*1b/*15(388G/G,521T/C)	E3/E3	0	1	1.5	4.41	1.34	2.43	1.22	0.64
654	1	86	*1a/*1b(388A/G,521T/T)	E3/E3	0	1	0.5	3.91	0.98	2.69	0.95	0.74
655	0	84	*1b/*15(388G/G,521T/C)	E3/E3	0	1	0.84	2.69	0.56	1.73
656	0	87	*1b/*1b(388G/G,521T/T)	E3/E3	0	1	0.66	4.74	1.57	3.09	1.11	0.84
657	0	84	*1b/*15(388G/G,521T/C)	E3/E3	0	1	1.08	3.01	0.53	2.07
658	0	74	*1b/*1b(388G/G,521T/T)	E3/E4	0	1	0.95	3.27	0.52	2.6	0.68	0.88
659	1	74	*1a/*15(388A/G,521T/C)	E3/E4	0	0	0.95	3.18	1.06	1.78	0.82	0.56
660	1	58	*1b/*15(388G/G,521T/C)	E3/E4	0	1	1.62	4.63	1.3	2.67	1.52	0.87
661	1	66	*1b/*1b(388G/G,521T/T)	E3/E3	0	0	0.44	3.03	0.92	1.85
662	0	72	*1a/*15(388A/G,521T/C)	E3/E3	0	0	1.68	5.94	1.22	4.14	1.42	1.24
663	0	39	*1a/*15(388A/G,521T/C)	E2/E3	0	0	4.26	4.75	0.73	2.09	1.06	0.71
664	1	89	*1a/*1b(388A/G,521T/T)	E3/E4	0	1	1.03	3.79	0.89	2.22
665	0	78	*1a/*1a(388A/A,521T/T)	E3/E3	0	1	0.7	1.74	0.61	0.78	0.69	0.29
666	0	79	*1a/*1b(388A/G,521T/T)	E3/E4	0	1	0.45	4.05	1.75	2.1	1.24	0.56
667	0	61	*1b/*15(388G/G,521T/C)	E3/E3	0	1	1.27	4.89	1.04	3.74	1.21	1.09
668	1	94	*1b/*1b(388G/G,521T/T)	E3/E3	0	1	0.47	2.67	1.4	0.97
669	1	90	*1b/*1b(388G/G,521T/T)	E3/E3	0	1	1.21	3.99	0.86	2.85
670	0	61	*1a/*1b(388A/G,521T/T)	E3/E3	0	0	0.76	6.54	1.32	5.16
671	1	53	*1b/*1b(388G/G,521T/T)	E3/E3	0	0	0.47	3.56	1.2	2.28
672	1	86	*1a/*1b(388A/G,521T/T)	E3/E3	0	1	0.73	4.18	0.98	3.13
673	0	60	*1b/*15(388G/G,521T/C)	E3/E3	0	1	0.43	2.94	0.92	1.97
674	1	58	*1b/*15(388G/G,521T/C)	E3/E3	0	0	1.89	4.21	1.14	2.54
675	1	99	*1a/*1b(388A/G,521T/T)	E3/E3	0	1	1.15	4.15	0.71	2.97
676	0	82	*1a/*15(388A/G,521T/C)	E2/E3	0	0	0.8	3	1.24	1.26	1.12	0.44
677	0	32	*1a/*15(388A/G,521T/C)	E2/E3	0	0	5.54	5.08	0.69	2.25	0.94	0.7
678	1	57	*1a/*1b(388A/G,521T/T)	E3/E3	0	1	2.16	5.34	1.45	3.77	1.14	1
679	1	63	*1b/*15(388G/G,521T/C)	E3/E3	0	1	0.57	3.78	0.72	1.92	1.23	0.53
680	0	42	*1a/*1b(388A/G,521T/T)	E3/E3	0	0	6.12	3.99	0.82	2.12	1.07	0.61
681	0	83	*1a/*1b(388A/G,521T/T)	E3/E3	0	0	1.14	4.91	1.1	3.32
682	0	58	*1a/*1a(388A/A,521T/T)	E3/E3	0	1	3.34	3.91	0.76	2.44	1.1	0.81
683	1	54	*1b/*1b(388G/G,521T/T)	E3/E3	0	1	1	3.1	1.13	1.57	1.05	0.48
684	1	73	*1b/*1b(388G/G,521T/T)	E3/E3	0	1	0.67	6.58	0.17	4.04
685	0	84	*1b/*15(388G/G,521T/C)	E3/E3	0	1	1	4.24	0.65	3.34
686	1	72	*1a/*1b(388A/G,521T/T)	E2/E3	0	1	3.52	6.28	1.21	3.56	1.55	1.3
687	0	74	*1b/*1b(388G/G,521T/T)	E3/E4	0	1	1.04	4.15	0.81	3.22
688	1	54	*1a/*1b(388A/G,521T/T)	E3/E3	0	0	1.75	4.08	1	2.51	0.97	0.75
689	1	94	*1b/*1b(388G/G,521T/T)	E3/E3	0	1	0.52	2.86	1.43	0.89
690	1	64	*1b/*15(388G/G,521T/C)	E2/E3	0	1	0.81	3.33	1.24	1.82
691	0	61	*1a/*1b(388A/G,521T/T)	E3/E3	0	0	0.48	5.21	1.22	3.85
692	0	86	*1b/*1b(388G/G,521T/T)	E3/E3	0	1	1.32	4.26	0.45	3.56	0.37	1.18
693	1	65	*1b/*1b(388G/G,521T/T)	E3/E3	0	1	1.31	4.88	0.77	2.5	1.54	0.74
694	1	60	*1b/*15(388G/G,521T/C)	E3/E3	0	0	1	5.04	1.19	3.75	1.2	1.12
695	0	53	*1b/*1b(388G/G,521T/T)	E3/E3	0	0	0.94	4.74	1.27	3.1	1.31	0.9
696	1	50	*1a/*1b(388A/G,521T/T)	E3/E4	0	0	1.01	6.18	0.43	3.44
697	1	86	*1a/*1b(388A/G,521T/T)	E3/E3	0	1	0.95	4.13	0.94	2.79	1	0.78
698	1	62	*1a/*1b(388A/G,521T/T)	E3/E3	0	1	1.49	5.52	1.51	3.98
699	0	60	*1b/*1b(388G/G,521T/T)	E3/E3	0	0	0.81	5.06	1.22	3.17
700	0	74	*1b/*1b(388G/G,521T/T)	E3/E4	0	1	1.04	4.15	0.81	3.22
701	0	64	*1a/*15(388A/G,521T/C)	E3/E3	0	1	1.08	4.46	1.47	2.89	1.22	0.96
702	0	82	*1b/*1b(388G/G,521T/T)	E3/E4	0	0	0.51	4.04	1.13	2.64
703	0	69	*1b/*1b(388G/G,521T/T)	E3/E3	0	1	3.03	4.89	1.1	3.24	1.16	1.24
704	1	74	*1b/*1b(388G/G,521T/T)	E3/E3	0	1	0.98	4.48	1.27	3.17	0.98	0.99
705	1	55	*1a/*1b(388A/G,521T/T)	E3/E3	0	0	1.84	4.85	1.5	3.16	1.52	0.99
706	0	46	*1a/*1b(388A/G,521T/T)	E2/E3	0	1	1.55	4.09	1.11	2.25	1.33	0.77
707	0	72	*1b/*1b(388G/G,521T/T)	E3/E3	0	1	0.7	4.45	1.37	2.89
708	1	59	*1b/*1b(388G/G,521T/T)	E3/E4	0	1	1.84	3.81	1.33	1.94	1.56	0.79
709	1	56	*1a/*1b(388A/G,521T/T)	E3/E3	0	0	0.92	5.4	1.87	3.06	1.85	1.05
710	1	42	*1a/*1b(388A/G,521T/T)	E2/E4	0	0	0.83	4.98	1.79	3.19
711	1	91	*1b/*1b(388G/G,521T/T)	E3/E3	0	1	1.02	3.96	1.33	1.98
712	0	84	*1b/*15(388G/G,521T/C)	E3/E3	0	1	0.98	3.7	0.69	2.53	0.72	0.71
713	0	44	*1b/*1b(388G/G,521T/T)	E3/E3	0	1	1.12	4.55	1.14	3.05	1.19	0.89
714	0	91	*1b/*1b(388G/G,521T/T)	E3/E4	0	1	1.97	3.76	0.37	2.43	0.5	0.84
715	0	66	*1b/*15(388G/G,521T/C)	E2/E3	0	0	0.9	1.72	0.09	0.68	0.05	0.44
716	1	85	*1a/*15(388A/G,521T/C)	E3/E3	0	1	2.1	4.83	1.07	3.11	1.13	0.89
717	0	82	*1a/*15(388A/G,521T/C)	E2/E3	0	1	0.47	1.98	0.76	0.83	0.65	0.29
718	1	86	*1a/*1b(388A/G,521T/T)	E3/E3	0	1	1	4.2	0.96	2.87	0.99	0.78
719	0	77	*1a/*1b(388A/G,521T/T)	E3/E4	0	1	0.72	3.25	1.08	1.77
720	1	29	*1a/*1b(388A/G,521T/T)	E3/E4	0	0	1.36	5.8	1.09	4.48	1.17	1.32
721	0	56	*15/*15(388G/G,521C/C)	E3/E3	0	0	0.49	2.35	0.84	1.09
722	0	59	*1b/*15(388G/G,521T/C)	E3/E4	0	1	3.2	3.06	0.84	1.5
723	1	52	*1a/*1b(388A/G,521T/T)	E3/E3	0	0	0.95	5.11	0.92	3.09	1.84	0.82
724	1	82	*1b/*1b(388G/G,521T/T)	E3/E3	0	1	1.66	3.47	1.1	1.79	1.23	0.58
725	0	39	*1b/*15(388G/G,521T/C)	E3/E3	0	0	10.72	5.1	0.67	1.93	0.88	0.35
726	1	81	*1a/*1b(388A/G,521T/T)	E3/E4	0	1	0.72	3.3	1.25	1.54
727	0	57	*1a/*1a(388A/A,521T/T)	E3/E3	0	0	0.76	3.93	1.02	2.65
728	0	73	*1b/*1b(388G/G,521T/T)	E3/E3	0	1	3.04	4.46	0.77	2.38
729	1	65	*1a/*1b(388A/G,521T/T)	E2/E3	0	0	0.96	3.28	1.05	1.89
730	1	86	*1a/*1b(388A/G,521T/T)	E3/E3	0	1	1.17	4.22	0.97	3.02	0.95	0.78
731	1	91	*1b/*1b(388G/G,521T/T)	E3/E3	0	1	0.65	3.96	1.61	1.75
732	0	82	*1b/*1b(388G/G,521T/T)	E3/E3	0	1	0.9	4.71	1.38	3.16	1.1	0.93
733	1	83	*1a/*1b(388A/G,521T/T)	E2/E3	0	1	2.07	4.78	1.41	2.58	1.6	0.84
734	1	77	*1a/*1b(388A/G,521T/T)	E3/E4	0	0	0.95	6.31	0.72	1.55	1.56	1.14
735	1	60	*1b/*1b(388G/G,521T/T)	E3/E3	0	1	1.25	4.8	1.33	3.24	1.38	1.01
736	1	92	*1a/*1b(388A/G,521T/T)	E3/E4	0	1	1.07	3.57	0.88	2.39	0.87	0.62
737	0	67	*1b/*1b(388G/G,521T/T)	E3/E3	0	0	0.92	5.17	1.74	3.15
738	1	54	*1a/*1b(388A/G,521T/T)	E3/E3	0	1	1.06	4.13	1.63	1.98	1.45	0.64
739	1	99	*1a/*1b(388A/G,521T/T)	E3/E3	0	1	1.42	6.12	1.01	4.18
740	1	61	*1b/*1b(388G/G,521T/T)	E3/E4	0	0	2.54	6.05	1.5	3.94	1.57	1.21
741	1	65	*1b/*1b(388G/G,521T/T)	E3/E3	0	0	1.09	5.57	1.47	3.42
742	0	73	*1a/*15(388A/G,521T/C)	E3/E3	0	1	2.08	4.36	1.04	2.64
743	0	35	*1b/*1b(388G/G,521T/T)	E3/E4	0	0	1.54	5.35	1.09	3.96
744	0	82	*1a/*15(388A/G,521T/C)	E2/E3	0	1	0.58	2.2	0.85	0.9
745	0	78	*1b/*1b(388G/G,521T/T)	E2/E3	0	1	1.59	3.58	0.98	1.92
746	0	73	*1b/*1b(388G/G,521T/T)	E3/E3	0	1	3.04	4.46	0.77	2.38
747	0	50	*1a/*15(388A/G,521T/C)	E3/E3	0	0	1.02	4.81	0.98	3.62	1.04	1.06
748	1	46	*1a/*1b(388A/G,521T/T)	E3/E3	0	1	1.04	4.29	1.09	2.89
749	1	84	*1a/*15(388A/G,521T/C)	E3/E3	0	0	1.21	4.33	1.21	2.38
750	0	57	*1a/*1b(388A/G,521T/T)	E2/E3	0	1	2.77	4.3	0.99	2.32	1.3	0.86
751	0	70	*1b/*1b(388G/G,521T/T)	E3/E3	0	0	0.66	3.6	1.64	1.51	1.59	0.51
752	0	59	*1b/*1b(388G/G,521T/T)	E2/E3	0	1	2.13	4.6	1.21	2.88
753	0	91	*1a/*1b(388A/G,521T/T)	E3/E3	0	1	1.03	3.93	1.47	1.61
754	1	91	*1b/*1b(388G/G,521T/T)	E3/E3	0	1	1.11	4.4	1.48	1.88
755	1	62	*1a/*1b(388A/G,521T/T)	E2/E3	0	0	1.18	4.21	1.17	2.38	1.23	0.75
756	0	60	*1b/*1b(388G/G,521T/T)	E3/E3	0	0	0.65	3.42	1.24	1.96
757	0	42	*1b/*15(388G/G,521T/C)	E2/E3	0	0	0.45	3.65	1.23	2.31	1.14	0.62
758	0	53	*1a/*1b(388A/G,521T/T)	E3/E3	0	1	0.92	2.29	0.8	1.12	0.89	0.44
759	0	88	*1a/*1b(388A/G,521T/T)	E3/E3	0	0	0.97	3.79	0.72	2.31
760	1	91	*1a/*1b(388A/G,521T/T)	E3/E3	0	1	0.55	4.69	1.75	2.08	1.56	0.58
761	1	86	*1a/*1b(388A/G,521T/T)	E3/E3	0	1	1.07	4	0.97	2.84	0.96	0.76
762	0	84	*1a/*15(388A/G,521T/C)	E3/E3	0	1	1.8	3.48	0.61	1.88	0.83	0.79
763	0	67	*1b/*1b(388G/G,521T/T)	E3/E3	0	0	0.95	4.81	1.4	2.95
764	0	80	*1b/*1b(388G/G,521T/T)	E3/E4	0	1	1.53	4.16	1.24	2.06	1.37	0.68
765	0	82	*1b/*1b(388G/G,521T/T)	E3/E3	0	1	0.59	3.15	1.18	1.3	1.25	0.45
766	1	55	*1a/*1b(388A/G,521T/T)	E3/E3	0	1	1.08	3.44	1.12	1.72
767	1	56	*1a/*1a(388A/A,521T/T)	E3/E3	0	0	2.75	5.63	1.35	3.18	1.39	0.91
768	0	89	*1a/*1b(388A/G,521T/T)	E2/E3	0	1	0.79	3.82	1.41	1.91
769	0	49	*1b/*1b(388G/G,521T/T)	E2/E4	0	0	1.24	5.11	1.27	3	1.43	0.94
770	0	39	*1b/*1b(388G/G,521T/T)	E3/E3	0	0	2.46	7.95	1.54	4.58
771	1	55	*1a/*1b(388A/G,521T/T)	E3/E3	0	0	2.2	5.07	0.87	2.66	1.03	0.99
772	0	58	*1b/*1b(388G/G,521T/T)	E3/E3	0	1	3.54	5.21	0.69	3.25	0.88	1.11
773	0	52	*1a/*1b(388A/G,521T/T)	E3/E3	0	1	2.39	4.53	1.45	2.44	1.33	0.86
774	1	87	*1b/*1b(388G/G,521T/T)	E3/E3	0	1	0.72	5.17	1.46	2.98	1.32	0.84
775	1	58	*1a/*15(388A/G,521T/C)	E3/E3	0	1	1.06	5.45	0.29	2.87	1.96	0.81
776	0	72	*1b/*1b(388G/G,521T/T)	E3/E3	0	0	1.22	4.26	0.91	2.97
777	1	58	*1b/*1b(388G/G,521T/T)	E3/E3	0	0	0.99	4.08	1.59	2.35	1.57	0.72
778	1	81	*1a/*1b(388A/G,521T/T)	E3/E3	0	1	1.06	3.25	1.13	1.64
779	1	47	*1b/*1b(388G/G,521T/T)	E3/E3	0	0	0.89	4.21	1.16	2.64
780	0	53	*1b/*1b(388G/G,521T/T)	E3/E3	0	0	0.61	4.86	1.14	3.37
781	1	72	*1a/*15(388A/G,521T/C)	E3/E3	0	0	0.7	2.9	1.14	1.24
782	1	46	*1b/*1b(388G/G,521T/T)	E3/E3	0	0	0.88	4.74	1.29	3.17
783	0	32	*1b/*15(388G/G,521T/C)	E3/E3	0	0	1.62	5.07	0.92	3.43
784	0	51	*1b/*15(388G/G,521T/C)	E3/E3	0	0	1.21	4.08	0.75	2.95
785	0	74	*1a/*1b(388A/G,521T/T)	E3/E3	0	0	0.6	2.37	0.85	0.91
786	1	35	*1b/*15(388G/G,521T/C)	E3/E3	0	0	1.15	4.76	1.13	3.16
787	0	90	*1b/*1b(388G/G,521T/T)	E2/E3	0	0	0.78	3.63	0.94	2.09
788	1	76	*1b/*1b(388G/G,521T/T)	E3/E3	0	1	1.03	4.14	1.96	1.16
789	0	65	*1b/*1b(388G/G,521T/T)	E3/E3	0	0	1.56	5.53	1.21	3.25
790	0	79	*1a/*15(388A/G,521T/C)	E2/E3	0	1	0.52	4.19	1.8	1.62
791	1	69	*1a/*1a(388A/A,521T/T)	E3/E3	0	0	0.89	3.53	0.78	2.32	0.86	0.72
792	0	76	*1b/*15(388G/G,521T/C)	E3/E4	0	0	0.93	4.9	1.79	2.73
793	1	55	*1b/*1b(388G/G,521T/T)	E3/E3	0	0	0.55	4.7	1.75	2.4	1.26	0.62
794	1	86	*1a/*1b(388A/G,521T/T)	E3/E3	0	1	0.95	3.71	0.96	2.6	0.96	0.73
795	0	33	*1b/*1b(388G/G,521T/T)	E3/E3	0	0	1.77	4.9	0.89	3.5
796	0	83	*1b/*1b(388G/G,521T/T)	E3/E3	0	1	1.18	3.03	0.43	2.19	0.62	1
797	0	60	*1b/*1b(388G/G,521T/T)	E3/E3	0	1	1.56	2.86	0.79	3.55	1.07	1.05
798	0	84	*1a/*1b(388A/G,521T/T)	E3/E3	0	1	0.68	4.51	1.15	2.6	1.05	0.7
799	1	55	*1b/*1b(388G/G,521T/T)	E3/E3	0	0	1.16	4.81	0.85	3.14
800	0	72	*1a/*1b(388A/G,521T/T)	E3/E3	0	1	1.9	4.44	0.68	2.74	0.85	0.9
801	0	81	*1b/*1b(388G/G,521T/T)	E3/E3	0	1	0.53	4.98	1.53	2.7	1.23	0.72
802	1	91	*1b/*1b(388G/G,521T/T)	E3/E3	0	1	0.72	3.39	1.16	1.56
803	0	70	*1a/*1b(388A/G,521T/T)	E3/E3	0	1	1.34	3.95	0.65	2.67
804	0	57	*1b/*1b(388G/G,521T/T)	E3/E3	0	0	6.03	7.24	0.87	3.48	1.05	1.16
805	0	52	*1b/*1b(388G/G,521T/T)	E3/E3	0	0	0.5	2.39	0.61	1.22
806	0	56	*1a/*1b(388A/G,521T/T)	E3/E3	0	1	1.98	4.73	1.34	2.81	1.32	0.84
807	1	86	*1a/*1b(388A/G,521T/T)	E3/E3	0	0	0.7	5.34	1.28	3.27	1.11	0.87
808	1	38	*1b/*1b(388G/G,521T/T)	E3/E3	0	0	1	3.6	1.01	2.18
809	0	58	*1b/*1b(388G/G,521T/T)	E3/E3	0	1	1.53	2.66	0.75	1.36	0.98	0.45
810	1	42	*1a/*1b(388A/G,521T/T)	E3/E3	0	0	0.58	3.33	1.19	2.13
811	1	71	*1b/*1b(388G/G,521T/T)	E3/E3	0	1	1	4.72	1.87	2.54
812	0	78	*1a/*15(388A/G,521T/C)	E3/E3	0	1	1.1	2.94	1.07	1.15	0.94	0.38
813	0	74	*1b/*1b(388G/G,521T/T)	E3/E4	0	1	0.69	4.18	0.9	3.07
814	0	70	*1b/*1b(388G/G,521T/T)	E2/E3	0	1	0.71	3.28	1.31	1.66
815	1	56	*1a/*1b(388A/G,521T/T)	E3/E3	0	0	1.21	4.88	1.36	2.5	1.46	0.71
816	1	54	*1a/*1a(388A/A,521T/T)	E3/E3	0	0	0.62	3.6	1.13	2.28
817	0	75	*1b/*1b(388G/G,521T/T)	E3/E4	0	1	1.46	4.22	1.02	2.72	1.04	0.77
818	1	50	*1a/*1b(388A/G,521T/T)	E3/E3	0	0	0.71	4.79	1.54	2.33	1.59	0.61
819	0	53	*1b/*1b(388G/G,521T/T)	E3/E3	0	0	1.67	4.51	0.82	2.58
820	1	85	*1b/*1b(388G/G,521T/T)	E2/E3	0	1	2.19	5.47	1.43	2.88
821	0	58	*1b/*1b(388G/G,521T/T)	E3/E4	0	0	1.17	4.35	1.33	2.66	1.2	0.75
822	1	86	*1a/*1b(388A/G,521T/T)	E3/E3	0	1	0.56	3.27	1.07	1.74	0.91	0.53
823	0	65	*1b/*1b(388G/G,521T/T)	E3/E4	0	0	2.53	4.84	0.91	2.65	0.98	0.91
824	1	48	*1a/*1b(388A/G,521T/T)	E3/E4	0	0	1.59	6.86	0.68	4.59	1.46	1.3
825	0	32	*1a/*15(388A/G,521T/C)	E2/E3	0	0	3.17	3.82	0.69	1.56	0.84	0.54
826	0	67	*1b/*1b(388G/G,521T/T)	E3/E3	0	0	1.1	6.09	0.81	3.77
827	0	24	*1b/*1b(388G/G,521T/T)	E2/E3	0	0	1.64	3.34	1.02	1.75	1.04	0.49
828	1	95	*1b/*15(388G/G,521T/C)	E3/E4	0	1	1.72	4.71	1.09	2.93
829	1	59	*1b/*1b(388G/G,521T/T)	E3/E3	0	1	1.47	5.58	1.07	3.89	1.09	1
830	1	37	*1b/*1b(388G/G,521T/T)	E2/E3	0	0	1.24	3.61	1.16	1.65	1.17	0.48
831	1	89	*1b/*1b(388G/G,521T/T)	E2/E3	0	1	0.63	3.46	1.41	1.26	1.3	0.39
832	1	56	*1b/*1b(388G/G,521T/T)	E3/E4	0	1	1.87	3.54	0.99	2.14
833	0	58	*1a/*1b(388A/G,521T/T)	E3/E3	0	0	0.61	3.82	1.36	2.32
834	0	72	*1b/*15(388G/G,521T/C)	E3/E4	0	0	0.75	3.6	0.88	2.43	0.75	0.63
835	1	60	*1b/*1b(388G/G,521T/T)	E2/E3	0	0	2.92	3.64	0.93	1.46
836	1	88	*1b/*1b(388G/G,521T/T)	E2/E3	0	0	1.75	4.86	1.37	2.2
837	1	54	*1b/*1b(388G/G,521T/T)	E3/E3	0	0	0.89	5.18	1.15	3.71
838	1	92	*1b/*15(388G/G,521T/C)	E4/E4	0	1	0.89	3.63	1.06	3.28	1.34	0.54
839	1	56	*1a/*1b(388A/G,521T/T)	E2/E3	0	1	0.76	4.33	1.27	2.32	1.15	0.62
840	0	72	*1b/*1b(388G/G,521T/T)	E3/E3	0	1	1.24	5.25	1.08	3.57	1.03	0.62
841	1	83	*1a/*1b(388A/G,521T/T)	E3/E4	0	1	0.97	3.96	1.34	2.02	1.34	0.59
842	0	54	*1b/*1b(388G/G,521T/T)	E2/E3	0	1	2.64	5.17	0.83	2.52	1.13	0.88
843	1	85	*1b/*15(388G/G,521T/C)	E3/E3	0	1	2.83	5.01	0.97	2.95	1.27	1.1
844	1	53	*1b/*1b(388G/G,521T/T)	E3/E4	0	0	0.77	5.23	1.33	3.86
845	1	33	*1b/*1b(388G/G,521T/T)	E2/E3	0	0	1.51	4.42	0.76	2.89
846	0	64	*1a/*1b(388A/G,521T/T)	E3/E3	0	0	1.26	4.42	0.71	3.49	0.77	0.97
847	0	57	*1a/*15(388A/G,521T/C)	E3/E4	0	0	2.38	5	0.97	3.29
848	0	58	*1b/*1b(388G/G,521T/T)	E3/E3	0	0	0.73	3.3	1.08	1.93
849	0	37	*1a/*1b(388A/G,521T/T)	E3/E3	0	1	2.58	3.96	0.82	2.04
850	0	52	*1b/*1b(388G/G,521T/T)	E3/E3	0	0	0.73	1.99	0.56	0.99	0.59	0.34
851	1	69	*1a/*1b(388A/G,521T/T)	E3/E3	0	0	1.46	4.72	1.36	2.98
852	0	71	*1b/*1b(388G/G,521T/T)	E3/E3	0	1	0.85	4.41	1.44	2.97
853	1	86	*1a/*1b(388A/G,521T/T)	E3/E3	0	1	0.93	3.85	0.96	2.61	0.93	0.72
854	0	91	*1a/*1b(388A/G,521T/T)	E3/E3	0	1	0.73	3.63	1.28	1.67
855	0	40	*1a/*1b(388A/G,521T/T)	E3/E3	0	0	1.5	2.85	0.68	1.82
856	0	27	*1a/*15(388A/G,521T/C)	E2/E3	0	0	4.55	6.23	0.89	3.45
857	0	69	*1b/*1b(388G/G,521T/T)	E3/E4	0	0	1	3.34	1.07	1.53	1.09	0.45
858	1	90	*1b/*1b(388G/G,521T/T)	E3/E3	0	1	0.51	2.7	0.97	1.01
859	1	66	*1b/*1b(388G/G,521T/T)	E3/E3	0	0	1.19	4.09	0.74	2.48	0.74	0.72
860	0	54	*1a/*1b(388A/G,521T/T)	E3/E3	0	1	6.52	4.74	0.85	2.33	1.01	0.95
861	1	95	*1b/*1b(388G/G,521T/T)	E3/E3	0	1	0.42	2.77	1.35	0.76
862	0	82	*1b/*15(388G/G,521T/C)	E3/E3	0	0	0.94	2.14	0.75	1.08	0.56	0.28
863	0	39	*1a/*15(388A/G,521T/C)	E3/E3	0	0	3.16	4.99	1.04	2.98	1.12	1.06
864	1	51	*1a/*1b(388A/G,521T/T)	E4/E4	0	0	3.25	3.78	0.75	1.71
865	1	92	*1a/*1b(388A/G,521T/T)	E3/E4	0	1	0.48	4.47	1.28	2.64
866	1	50	*1b/*15(388G/G,521T/C)	E3/E3	0	1	2.21	5.26	1.19	3.04	1.41	1.02
867	0	57	*1b/*15(388G/G,521T/C)	E3/E3	0	0	0.81	4.4	1.05	2.82
868	1	10	*1b/*1b(388G/G,521T/T)	E3/E3	0	0	0.95	4.15	1.59	2.44	1.44	0.6
869	0	70	*1b/*1b(388G/G,521T/T)	E3/E3	0	0	0.76	3.53	1.34	1.78
870	1	86	*1a/*1b(388A/G,521T/T)	E3/E3	0	1	0.83	3.97	0.85	2.61	0.99	0.78
871	0	54	*1a/*1b(388A/G,521T/T)	E3/E3	0	1	0.94	3.58	0.94	2.34
872	1	65	*1b/*15(388G/G,521T/C)	E3/E3	0	0	0.79	5.26	1.5	3.02
873	1	74	*1a/*15(388A/G,521T/C)	E3/E3	0	0	1.4	5.6	1.26	3.9
874	0	40	*1a/*1b(388A/G,521T/T)	E2/E2	0	1	0.97	2.59	1.34	0.7
875	1	67	*1b/*1b(388G/G,521T/T)	E3/E4	0	1	1.55	4.91	1.03	3.13
876	1	59	*1b/*1b(388G/G,521T/T)	E3/E3	0	0	2.38	5.68	1.29	3.58	1.58	1.22
877	1	95	*1b/*1b(388G/G,521T/T)	E3/E3	0	1	0.47	3.07	1.62	0.86
878	1	61	*15/*15(388G/G,521C/C)	E3/E3	0	0	1.78	6.73	1.34	4.98
879	0	63	*1a/*1b(388A/G,521T/T)	E3/E3	0	1	1.96	5.15	0.85	3.22
880	1	68	*1b/*1b(388G/G,521T/T)	E2/E4	0	1	1.22	4.73	1.62	2.35
881	0	62	*1a/*15(388A/G,521T/C)	E3/E4	0	1	1.28	2.42	0.63	1.09	1.19	0.53
882	1	91	*1a/*1b(388A/G,521T/T)	E3/E3	0	1	1.17	5.51	0.72	2.81	1.41	1.14
883	1	86	*1a/*1b(388A/G,521T/T)	E3/E3	0	1	0.89	3.99	1.04	2.43	1.11	0.77
884	1	91	*1b/*1b(388G/G,521T/T)	E3/E3	0	1	1.2	3.81	1.29	1.95
885	1	41	*1a/*1b(388A/G,521T/T)	E3/E3	0	0	2.07	3.88	1.13	2
886	1	58	*1b/*1b(388G/G,521T/T)	E3/E3	0	1	1.79	5.49	1.03	3.69
887	0	63	*1a/*1b(388A/G,521T/T)	E3/E3	0	1	1.96	5.15	0.85	3.22
888	1	74	*1a/*1a(388A/A,521T/T)	E3/E3	0	1	0.81	4.16	1.33	2.4
889	0	66	*1b/*15(388G/G,521T/C)	E3/E3	0	1	1.56	4.3	1.3	2.39
890	1	87	*1a/*1b(388A/G,521T/T)	E3/E3	0	1	0.89	4.26	1.06	2.81	1.06	0.95
891	1	95	*1b/*1b(388G/G,521T/T)	E3/E3	0	1	0.66	2.95	1.66	0.82
892	0	43	*1a/*15(388A/G,521T/C)	E3/E3	0	1	3.01	4.54	0.95	2.62
893	1	52	*1b/*1b(388G/G,521T/T)	E3/E4	0	0	0.65	3.44	1.69	1.28
894	1	91	*1b/*1b(388G/G,521T/T)	E3/E3	0	1	1.26	6.15	1.47	1.46	1.19	1.32
895	0	43	*1a/*1a(388A/A,521T/T)	E2/E3	0	1	4.83	6.72	0.85	2.88
896	1	55	*1b/*1b(388G/G,521T/T)	E3/E3	0	1	0.79	3.38	1.07	1.61
897	1	58	*1a/*15(388A/G,521T/C)	E2/E3	0	1	0.64	3.22	1.57	1.3	1.61	0.5
898	0	47	*1b/*1b(388G/G,521T/T)	E2/E3	0	0	2.51	6.08	0.96	2.88
899	1	53	*1a/*1b(388A/G,521T/T)	E3/E3	0	0	1.52	5.43	1.31	3.72	1.46	1.27
900	1	91	*1b/*1b(388G/G,521T/T)	E3/E3	0	1	0.82	3.77	1.32	1.79
901	0	43	*1b/*15(388G/G,521T/C)	E3/E3	0	1	2.03	5.24	1.37	3.06
902	1	69	*1b/*1b(388G/G,521T/T)	E3/E4	0	0	2.28	3.71	1.34	1.51
903	1	81	*1a/*1b(388A/G,521T/T)	E3/E3	0	1	0.6	3.96	1.12	1.1
904	0	91	*1a/*1b(388A/G,521T/T)	E3/E3	0	1	1.05	3.54	1.16	1.81
905	1	87	*1a/*1b(388A/G,521T/T)	E3/E3	0	1	0.66	3.62	1.01	2.21
906	0	59	*1a/*1b(388A/G,521T/T)	E3/E4	0	0	1.12	3.68	0.78	2.56
907	0	63	*1b/*1b(388G/G,521T/T)	E3/E4	0	1	2.34	6.06	1.05	3.94
908	0	44	*1b/*1b(388G/G,521T/T)	E3/E3	0	1	0.74	4.2	1.55	2.49	1.4	0.66
909	1	56	*1b/*1b(388G/G,521T/T)	E3/E3	0	1	1.1	2.93	0.55	1.78	1.17	0.67
910	0	95	*1b/*15(388G/G,521T/C)	E3/E3	0	1	0.68	3.68	0.95	2
911	0	43	*1b/*1b(388G/G,521T/T)	E2/E4	0	0	1.8	5	1.2	2.57	1.25	0.9
912	0	45	*1a/*1b(388A/G,521T/T)	E3/E3	0	0	2.14	4.41	0.78	2.78
913	0	50	*1b/*1b(388G/G,521T/T)	E3/E3	0	0	1.7	3.33	0.99	1.41	0.74	0.76
914	1	87	*1a/*1b(388A/G,521T/T)	E3/E3	0	1	0.91	3.68	0.89	2.42	0.93	0.87
915	1	63	*1a/*1b(388A/G,521T/T)	E3/E3	0	0	1.17	4.84	1.37	2.76	1.15	1.02
916	1	75	*1b/*15(388G/G,521T/C)	E3/E3	0	1	1.63	5.02	1.17	3.12
917	1	72	*1a/*15(388A/G,521T/C)	E3/E3	0	0	0.51	3.08	1.31	1.21
918	1	69	*1b/*15(388G/G,521T/C)	E3/E3	0	0	0.95	3.89	0.91	2.18
919	0	52	*1a/*15(388A/G,521T/C)	E3/E3	0	1	0.95	4.56	1.65	2.56
920	0	60	*1a/*1b(388A/G,521T/T)	E3/E3	0	1	3.64	4.64	0.77	2.98	0.99	1.14
921	1	85	*1a/*1b(388A/G,521T/T)	E3/E3	0	1	0.84	3.54	1.03	1.93
922	1	62	*1a/*1b(388A/G,521T/T)	E3/E3	0	1	1.02	3.27	1.26	1.57
923	1	69	*1b/*1b(388G/G,521T/T)	E3/E3	0	1	1.52	4.51	1.18	2.81
924	1	67	*1b/*1b(388G/G,521T/T)	E3/E4	0	1	1.23	4.22	1.52	2.27
925	0	36	*1b/*1b(388G/G,521T/T)	E2/E3	0	1	1.87	3.22	1.17	1.49
926	1	68	*1b/*1b(388G/G,521T/T)	E3/E4	0	0	1.36	4.93	1.13	2.95
927	0	65	*1b/*1b(388G/G,521T/T)	E3/E3	0	1	0.94	4.86	2.34	2.26	1.79	0.75
928	0	61	*1a/*1b(388A/G,521T/T)	E3/E3	0	1	1.61	3.87	0.75	2.8
929	0	37	*1a/*1b(388A/G,521T/T)	E3/E3	0	1	1.16	4.35	1.06	3.15
930	1	95	*1b/*1b(388G/G,521T/T)	E3/E3	0	1	0.59	3.71	0.99	0.95	1.1	0.36
931	1	60	*1b/*1b(388G/G,521T/T)	E3/E3	0	0	0.67	4.07	1.15	1.61
932	1	87	*1a/*1b(388A/G,521T/T)	E3/E3	0	1	1.48	4.93	1.51	3.41	0.93	0.87
933	1	91	*1b/*1b(388G/G,521T/T)	E3/E3	0	1	0.72	3.25	1.14	1.68	1.37	0.76
934	1	72	*1a/*1b(388A/G,521T/T)	E3/E3	0	1	0.64	2.76	1.03	1.52
935	0	82	*1a/*1a(388A/A,521T/T)	E3/E4	0	1	1.61	5.07	0.9	3.76
936	0	63	*1b/*15(388G/G,521T/C)	E3/E4	0	1	1.43	4.7	0.98	3.52
937	0	71	*1b/*1b(388G/G,521T/T)	E3/E3	0	1	1.15	3.21	1.1	1.79
938	1	91	*1b/*1b(388G/G,521T/T)	E3/E3	0	1	1.38	5.45	1.35	4.04
939	0	82	*1a/*1a(388A/A,521T/T)	E3/E4	0	1	1.61	5.07	0.9	3.76
940	1	79	*1a/*1a(388A/A,521T/T)	E2/E3	0	1	1	3.65	1.38	1.61
941	1	95	*1b/*1b(388G/G,521T/T)	E3/E3	0	1	0.74	2.55	1.06	1.08
942	1	87	*1a/*1b(388A/G,521T/T)	E3/E3	0	1	0.74	3.54	0.94	2.14	0.91	0.74
943	1	91	*1b/*1b(388G/G,521T/T)	E3/E3	0	1	0.95	3.54	0.99	1.96
944	1	95	*1b/*1b(388G/G,521T/T)	E3/E3	0	1	0.79	3.11	1.12	1.32
945	0	41	*1b/*1b(388G/G,521T/T)	E3/E3	0	0	1.44	5.01	0.97	3.06
946	1	60	*1a/*15(388A/G,521T/C)	E3/E4	0	1	1.69	5.57	1.22	3.62
947	0	44	*1a/*1b(388A/G,521T/T)	E2/E3	0	1	1.45	3.29	1.45	1.25
948	0	46	*1a/*1b(388A/G,521T/T)	E3/E3	0	0	3.53	4.11	0.77	2.42
949	1	87	*1a/*1b(388A/G,521T/T)	E3/E3	0	1	0.98	3.32	0.75	2.22	0.75	0.68
950	1	68	*1b/*1b(388G/G,521T/T)	E3/E3	0	1	1.01	4.76	1.21	3.35
951	1	74	*1a/*1b(388A/G,521T/T)	E3/E4	0	0	1.31	2.58	0.4	1.54
952	0	36	*1b/*1b(388G/G,521T/T)	E2/E3	0	1	5.42	4.42	0.81	2.12
953	1	87	*1a/*1b(388A/G,521T/T)	E3/E3	0	1	0.86	3.73	0.89	2.47	0.84	0.79
954	0	78	*1a/*1b(388A/G,521T/T)	E3/E3	0	1	1.43	4.55	1.21	2.73
955	1	92	*1b/*15(388G/G,521T/C)	E4/E4	0	1	0.93	5.91	1.51	3.78
956	1	47	*1a/*1b(388A/G,521T/T)	E3/E4	0	1	0.83	3.75	1.04	2.56
957	0	52	*1b/*1b(388G/G,521T/T)	E3/E3	0	1	1.11	3.11	1.28	1.42
958	0	83	*1b/*15(388G/G,521T/C)	E3/E3	0	1	1.74	2.99	0.81	1.57	0.92	0.51
959	1	87	*1a/*1b(388A/G,521T/T)	E3/E3	0	1	1.09	4.13	0.9	2.87	0.83	0.9
960	0	52	*1b/*1b(388G/G,521T/T)	E3/E3	0	1	1.92	5.15	0.98	3.48	0.88	1.16
961	1	95	*1b/*1b(388G/G,521T/T)	E3/E3	0	1	0.74	2.91	1.04	1.28
962	1	51	*1b/*1b(388G/G,521T/T)	E3/E3	0	1	2.02	4.77	1.24	2.75
963	1	92	*1b/*1b(388G/G,521T/T)	E3/E3	0	1	1.15	4.46	1.57	2.37	1.22	0.71
964	1	53	*1a/*1b(388A/G,521T/T)	E3/E3	0	0	0.58	4.55	0.97	2.08
965	1	83	*1a/*1b(388A/G,521T/T)	E3/E3	0	1	0.64	3.72	1.1	2.15	0.94	0.69
966	0	67	*1a/*15(388A/G,521T/C)	E3/E3	0	1	1.06	4.15	0.91	2.9
967	1	46	*1b/*15(388G/G,521T/C)	E2/E3	0	0	3.15	5.1	0.79	2.88
968	0	55	*1b/*1b(388G/G,521T/T)	E3/E3	0	0	0.7	2.64	0.56	1.8
969	0	80	*1b/*1b(388G/G,521T/T)	E3/E3	0	1	1.3	3.49	1.03	1.78
970	1	72	*1b/*15(388G/G,521T/C)	E3/E4	0	1	2.36	6.21	1.24	3.33
971	1	67	*1a/*1a(388A/A,521T/T)	E3/E3	0	0	1.13	3.37	0.53	1.75
972	1	68	*1b/*1b(388G/G,521T/T)	E3/E4	0	1	0.82	3.46	0.82	2.29	0.7	0.69
973	0	40	*1b/*15(388G/G,521T/C)	E3/E3	0	1	2.1	5.77	1.12	3.58	1.14	1.24
974	1	73	*1a/*1b(388A/G,521T/T)	E3/E3	0	0	1.1	4.67	1.48	3.64	1.15	1.05
975	1	96	*1b/*1b(388G/G,521T/T)	E3/E3	0	1	0.94	2.95	0.99	1.37
976	1	51	*1a/*1b(388A/G,521T/T)	E2/E3	0	1	0.58	4.24	0.72	2.01	1.43	0.58
977	1	92	*1b/*1b(388G/G,521T/T)	E3/E3	0	1	0.83	4.38	1.21	2.54	1.03	0.75
978	1	53	*1b/*1b(388G/G,521T/T)	E3/E4	0	1	1.05	4.02	1.46	2.2
979	0	59	*1b/*1b(388G/G,521T/T)	E3/E4	0	1	1.1	4.19	1.14	2.58
980	0	38	*1b/*1b(388G/G,521T/T)	E2/E3	0	0	1.28	3.37	0.93	1.9	0.63	0.79
981	0	79	*1a/*1b(388A/G,521T/T)	E2/E3	0	1	1.36	3.77	0.76	2.13
982	0	42	*1b/*15(388G/G,521T/C)	E3/E3	0	1	1.66	3.98	0.87	2.61	0.97	1.21
983	1	59	*1a/*1b(388A/G,521T/T)	E2/E3	0	0	0.87	4.05	1.16	2.38	1.07	0.72
984	1	65	*1a/*1b(388A/G,521T/T)	E3/E3	0	1	2.15	4.01	1.07	1.97	1.09	0.91
985	0	82	*1a/*1b(388A/G,521T/T)	E3/E3	0	0	1.49	5.21	0.79	3.79	0.73	1.14
986	1	86	*1b/*1b(388G/G,521T/T)	E3/E3	0	1	0.81	3.41	1.13	1.79	0.88	0.55
987	1	48	*1a/*1b(388A/G,521T/T)	E3/E4	0	0	0.98	4.11	1.03	2.69	0.98	0.81
988	1	48	*1b/*1b(388G/G,521T/T)	E3/E4	0	1	1.9	5.72	1.34	3.76	1.13	1.19
989	0	30	*1a/*1b(388A/G,521T/T)	E3/E4	0	1	2.3	5.73	0.8	4.35	0.78	1.4
990	1	87	*1a/*1b(388A/G,521T/T)	E3/E3	0	1	1.13	4.22	0.87	2.76	0.82	0.84
991	1	84	*1a/*1b(388A/G,521T/T)	E3/E3	0	0	0.69	4.32	1.47	2.51	1.11	0.75
992	1	56	*1b/*1b(388G/G,521T/T)	E3/E3	0	1	0.66	4.51	1.33	2.89
993	0	55	*1b/*1b(388G/G,521T/T)	E2/E3	0	1	1.64	3.26	0.9	1.72	1.06	1.23
994	1	51	*1a/*1b(388A/G,521T/T)	E3/E4	0	0	1.5	3.95	1.37	1.71	1.63	1.13
995	1	59	*1a/*1b(388A/G,521T/T)	E2/E3	0	0	0.92	3.5	1.15	1.88
996	1	71	*1b/*1b(388G/G,521T/T)	E2/E2	1	1	2.76	5.64	1.03	6.86	1.8	1.22
997	0	55	*1b/*1b(388G/G,521T/T)	E3/E4	1	1	0.73	4.46	1.29	2.73	1.01	0.96
998	0	54	*1a/*1b(388A/G,521T/T)	E3/E4	1	1	3.31	3.91	1.76	2.93	1.12	0.38
999	0	48	*1a/*1b(388A/G,521T/T)	E3/E4	1	1	4.02	5.09	1.98	2.55	1	1.1
1000	0	46	*1a/*1b(388A/G,521T/T)	E3/E4	1	0	1.55	4.89	1.74	3.23	1.72	0.41
1001	0	58	*1a/*1b(388A/G,521T/T)	E3/E4	1	0	1.11	4.17	1	2.54	1.72	1.41
1002	0	50	*1a/*1a(388A/A,521T/T)	E3/E4	1	0	1.66	4.77	1	2.1	2.82	1.14
1003	0	59	*1a/*1a(388A/A,521T/T)	E3/E4	1	0	2.09	5.37	1.22	2.15	1.02	1.25
1004	0	74	*1b/*1b(388G/G,521T/T)	E3/E4	1	0	0.68	5.45	1.56	2.46	1.45
1005	0	49	*1b/*15(388G/G,521T/C)	E3/E4	1	1	1.65	5.25	1.98	2.59	1.36
1006	0	74	*1b/*1b(388G/G,521T/T)	E3/E4	1	0	1.01	3.95	0.88	1.59	1.35
1007	0	79	*1a/*1b(388A/G,521T/T)	E3/E4	1	1	1.14	8	1.04	3.45	1.69
1008	0	61	*1b/*1b(388G/G,521T/T)	E3/E4	1	0	1.07	4.27	1.99	4.94	2
1009	0	75	*1b/*1b(388G/G,521T/T)	E3/E4	1	0	0.89	3.82	0.81	6.69	1.69
1010	0	65	*1b/*1b(388G/G,521T/T)	E3/E4	1	0	1.06	4.35	1.75	3.28	1.35
1011	0	66	*1b/*1b(388G/G,521T/T)	E3/E3	1	0	1.27	5	1.72	1.62	1.95	1.67
1012	0	73	*1b/*15(388G/G,521T/C)	E3/E4	1	1	0.91	6.83	1.93	4.45	1.95	0.83
1013	0	73	*1b/*1b(388G/G,521T/T)	E3/E4	1	0	0.76	5	0.53	4.17	1.36
1014	0	58	*1b/*15(388G/G,521T/C)	E3/E4	1	0	0.66	6.84	3.9	4.09	1.54
1015	0	66	*1a/*15(388A/G,521T/C)	E3/E4	1	1	1.35	6.66	1.82	2.99	1.41
1016	0	74	*1a/*1b(388A/G,521T/T)	E3/E4	1	1	0.83	6.56	1	2.98	1.65
1017	0	57	*1b/*15(388G/G,521T/C)	E3/E4	1	0	1.72	7.81	0.75	2.45	1.74	1.02
1018	0	85	*1a/*1b(388A/G,521T/T)	E3/E4	1	1	0.77	5.99	2.35	3.19	2.01
1019	0	81	*1a/*1b(388A/G,521T/T)	E3/E4	1	1	1.79	4.51	1.56	3.35	2.31
1020	0	58	*1a/*1b(388A/G,521T/T)	E3/E4	1	1	1.05	5.56	1.95	1.71	1.76	1.64
1021	0	81	*1a/*1b(388A/G,521T/T)	E3/E4	1	1	0.91	5.02	1.78	3.85	1.78	1.45
1022	0	80	*1a/*1b(388A/G,521T/T)	E4/E4	1	1	0.46	6.18	1.43	1.32	1.69
1023	0	57	*1a/*1b(388A/G,521T/T)	E2/E2	1	1	0.92	3.45	1.09	2.46	1.36
1024	0	58	*1b/*15(388G/G,521T/C)	E4/E4	1	1	2.36	7.47	0.86	1.57	1.54
1025	0	74	*1b/*1b(388G/G,521T/T)	E3/E4	1	0	0.73	6.98	0.61	3.94	1.95
1026	0	71	*1b/*1b(388G/G,521T/T)	E2/E3	1	1	1.18	6.86	0.75	2.51	1.92
1027	0	43	*1a/*15(388A/G,521T/C)	E3/E4	1	0	4.59	5.47	0.92	2.79	1.93	1.04
1028	0	65	*1a/*1b(388A/G,521T/T)	E2/E3	1	1	2.19	6.25	0.46	2.61
1029	0	77	*1b/*1b(388G/G,521T/T)	E3/E4	1	1	1.02	6.28	0.7	1.96
1030	0	59	*1a/*1b(388A/G,521T/T)	E3/E4	1	0	0.46	7.54	1.39	1.38
1031	0	84	*1a/*1b(388A/G,521T/T)	E3/E4	1	1	1.13	4.2	1.02	2.57	2.9	0.91
1032	0	81	*1a/*1b(388A/G,521T/T)	E3/E4	1	0	1.2	4.76	0.93	3.17	1.87	0.96
1033	0	73	*1b/*1b(388G/G,521T/T)	E2/E3	1	1	0.59	4.99	1.07	2.4
1034	0	73	*1b/*1b(388G/G,521T/T)	E3/E4	1	0	0.9	4.26	1.28	2.52
1035	0	80	*1b/*1b(388G/G,521T/T)	E3/E3	1	1	1.8	4.3	2.13	1.64
1036	0	56	*1a/*1b(388A/G,521T/T)	E3/E4	1	1	0.82	5.52	1.5	3.32
1037	0	74	*1a/*1a(388A/A,521T/T)	E3/E4	1	1	2.44	4.82	1.28	2.43
1038	0	65	*1b/*15(388G/G,521T/C)	E3/E3	1	0	2.11	4.2	1.72	1.84
1039	0	65	*1b/*15(388G/G,521T/C)	E3/E4	1	0	2.46	7.07	1.55	4	1.45	0.67
1040	0	71	*1a/*1b(388A/G,521T/T)	E3/E4	1	0	0.73	6.99	0.85	1.6	1.72	1.53
1041	0	43	*1a/*1b(388A/G,521T/T)	E3/E4	1	1	0.9	4.83	1.37	2.83	1.25	1.94
1042	0	87	*1a/*1b(388A/G,521T/T)	E3/E4	1	1	0.72	4.61	0.99	3	1.77	1.99
1043	0	65	*1b/*1b(388G/G,521T/T)	E3/E4	1	0	1.01	5.07	0.65	2.92	1.57	1.59
1044	0	86	*1b/*1b(388G/G,521T/T)	E3/E4	1	1	1.65	4.59	1.63	2.06	1.25	1.8
1045	0	50	*1a/*1b(388A/G,521T/T)	E3/E3	1	0	0.99	4.84	1.05	2.9	1.98	1.94
1046	0	66	*1b/*1b(388G/G,521T/T)	E3/E4	1	1	1.67	4.81	1.62	2.27
1047	0	67	*1b/*15(388G/G,521T/C)	E3/E4	1	1	2.44	4.68	1.9	3.04	2.85	1.09
1048	0	71	*1a/*15(388A/G,521T/C)	E3/E4	1	1	1.71	5.71	1.34	3.91	1.05	1.48
1049	0	71	*1a/*15(388A/G,521T/C)	E3/E4	1	1	2.29	8.58	1.65	3.98	1.68	1.75
1050	0	60	*1b/*1b(388G/G,521T/T)	E3/E4	1	1	1	4.45	1.89	2.79
1051	0	64	*1a/*1b(388A/G,521T/T)	E3/E4	1	0	0.7	5.79	1.28	4.05
1052	0	47	*1b/*1b(388G/G,521T/T)	E3/E4	1	0	0.8	5.44	1.05	3.73	1.98	1.27
1053	0	61	*1b/*15(388G/G,521T/C)	E4/E4	1	0	1.58	7.4	2.28	1.48	1.64	1.4
1054	0	68	*1b/*1b(388G/G,521T/T)	E3/E3	1	1	1.1	4.4	0.99	2.76
1055	0	75	*1a/*1a(388A/A,521T/T)	E3/E4	1	1	0.6	7.14	1.63	1.92
1056	0	73	*1b/*15(388G/G,521T/C)	E3/E4	1	1	0.74	5.1	0.92	3.82
1057	0	63	*1b/*15(388G/G,521T/C)	E3/E4	1	1	0.8	3.47	1.66	2.34	2.67	1.71
1058	0	66	*1a/*1b(388A/G,521T/T)	E3/E4	1	1	0.72	3.37	1.32	1.48	1.15	1.51
1059	0	81	*1b/*1b(388G/G,521T/T)	E3/E4	1	1	1.9	3.15	0.81	2.44	0.96	1.68
1060	0	80	*1a/*1b(388A/G,521T/T)	E3/E4	1	1	2.5	7.05	1.28	2.92	1.24	1.69
1061	0	62	*1b/*1b(388G/G,521T/T)	E3/E4	1	0	1.11	4.74	0.62	3.85	2.52	1.14
1062	0	63	*1a/*1b(388A/G,521T/T)	E3/E4	1	1	1.2	7.66	0.83	2.21	2.78	1.71
1063	0	86	*1a/*1b(388A/G,521T/T)	E3/E4	1	1	1.01	3.61	0.61	2.61	2.44	1.8
1064	0	79	*1b/*15(388G/G,521T/C)	E3/E3	1	1	0.88	4.01	1.12	1.26	1.21	1.6
1065	0	56	*1b/*1b(388G/G,521T/T)	E3/E4	1	1	0.88	4.38	1.19	2.69
1066	0	52	*1a/*1a(388A/A,521T/T)	E3/E3	1	0	1.36	6.39	1.67	1.82
1067	0	56	*1b/*1b(388G/G,521T/T)	E3/E3	1	1	0.9	4.08	0.93	2.38
1068	0	61	*1b/*1b(388G/G,521T/T)	E3/E4	1	0	0.61	6.41	0.78	1.01	0.69	1.33
1069	0	61	*1a/*1b(388A/G,521T/T)	E3/E4	1	1	1.78	6.56	0.84	1.04	0.92	1.44
1070	0	79	*1a/*1b(388A/G,521T/T)	E3/E4	1	1	1.45	6.54	0.85	1.97	1.01	1.78
1071	0	63	*1b/*1b(388G/G,521T/T)	E2/E2	1	1	3.24	4.91	1.23	1.15	1.58	0.59
1072	0	60	*1a/*1b(388A/G,521T/T)	E3/E4	1	1	1.91	7.75	1.34	2.68	1.28	1.97
1073	0	66	*1b/*15(388G/G,521T/C)	E3/E4	1	1	2.35	6.79	1.1	4.26
1074	0	56	*1b/*1b(388G/G,521T/T)	E3/E3	1	1	1.07	6.26	1.63	2.62	0.53	1.19
1075	0	20	*1b/*1b(388G/G,521T/T)	E3/E4	1	1	0.59	5.23	0.81	2.77	0.65	0.92
1076	0	69	*1a/*1a(388A/A,521T/T)	E3/E4	1	1	1.87	5.24	1.08	3.16	1.07	0.98
1077	0	54	*1a/*1b(388A/G,521T/T)	E3/E4	1	1	0.82	4.08	0.77	4.65	2.77	1.55
1078	0	64	*1b/*1b(388G/G,521T/T)	E3/E3	1	0	0.8	8.28	0.89	2.88	1.73	1.32
1079	0	68	*1a/*1a(388A/A,521T/T)	E3/E4	1	0	0.93	5.9	0.72	2.54
1080	0	87	*1a/*1b(388A/G,521T/T)	E3/E4	1	1	1.3	6.41	0.73	1.96	1.63	0.69
1081	0	57	*1a/*1a(388A/A,521T/T)	E3/E4	1	1	1.46	4.22	1.04	2.73	1.03	0.82
1082	0	60	*1a/*1b(388A/G,521T/T)	E3/E4	1	1	1.34	6.81	1.59	2.51	1.49	0.79
1083	0	55	*1b/*15(388G/G,521T/C)	E2/E4	1	1	5.42	7.89	1.2	3.16
1084	0	65	*1b/*1b(388G/G,521T/T)	E3/E4	1	1	2.48	6.54	1.15	3.94
1085	0	56	*1b/*1b(388G/G,521T/T)	E4/E4	1	0	1.82	6.33	1.4	3.57	1.1	1.27
1086	0	88	*1b/*1b(388G/G,521T/T)	E2/E4	1	1	1.15	6.59	0.41	2.67	0.54	1.33
1087	0	55	*1a/*1b(388A/G,521T/T)	E3/E4	1	1	12.86	5.83	0.8	1.74	0.75	1.36
1088	1	70	*1b/*1b(388G/G,521T/T)	E3/E4	1	1	1.25	4.88	1.11	1.67	1.06	1.58
1089	1	61	*1a/*1b(388A/G,521T/T)	E3/E4	1	1	1.67	3.52	1.2	1.67
1090	1	29	*1b/*1b(388G/G,521T/T)	E3/E4	1	0	1.24	5.78	0.81	1.94	1.78	0.68
1091	0	66	*1a/*1b(388A/G,521T/T)	E3/E4	1	0	0.76	3.71	0.96	4.92	1.79	0.61
1092	1	85	*1a/*1b(388A/G,521T/T)	E2/E4	1	1	0.67	5.87	0.94	1.41	1.9	0.53
1093	1	53	*1b/*1b(388G/G,521T/T)	E3/E4	1	1	2.26	6.6	1.35	4.49	1.43	1.41
1094	1	50	*1b/*15(388G/G,521T/C)	E3/E4	1	1	6.5	7.98	1.2	3.87
1095	1	79	*1b/*1b(388G/G,521T/T)	E3/E4	1	1	1.07	4.76	0.95	3.13	1.89	1.03
1096	1	70	*1a/*1b(388A/G,521T/T)	E3/E4	1	1	1.92	6.46	1.28	3.97
1097	1	77	*1b/*1b(388G/G,521T/T)	E2/E4	1	1	1.69	4.68	1.36	2.11	1.13	0.68
1098	1	82	*1b/*15(388G/G,521T/C)	E3/E4	1	1	1.1	6.36	1.42	4.23
1099	1	55	*1b/*1b(388G/G,521T/T)	E3/E4	1	1	2.76	4.6	1.95	2.08	0.95	0.89
1100	0	73	*1b/*1b(388G/G,521T/T)	E2/E4	1	0	0.77	4.09	1.01	2.54	0.94	0.76
1101	1	72	*1a/*1b(388A/G,521T/T)	E3/E4	1	1	0.97	4.26	0.86	2.67	0.64	0.79
1102	1	51	*1a/*1b(388A/G,521T/T)	E3/E4	1	1	0.97	4.62	1.72	2.33	0.66	0.69
1103	1	63	*1b/*1b(388G/G,521T/T)	E3/E4	1	1	1.71	5.61	1.18	3.37	1.05	1.25
1104	1	70	*1b/*1b(388G/G,521T/T)	E2/E4	1	1	1.44	4.25	1.19	2.08
1105	1	73	*1a/*1b(388A/G,521T/T)	E2/E4	1	1	0.87	4.19	1.17	2.43
1106	0	67	*1a/*1a(388A/A,521T/T)	E3/E4	1	0	0.61	3.33	1.09	1.7	0.96	0.57
1107	1	62	*1a/*1b(388A/G,521T/T)	E3/E4	1	1	0.87	5.42	1.13	3.62
1108	1	86	*1b/*1b(388G/G,521T/T)	E3/E4	1	1	0.86	6.62	1.96	2.92	0.79	0.65
1109	1	65	*1b/*1b(388G/G,521T/T)	E3/E4	1	1	1.44	5.33	1.17	3.68	1.12	1.11
1110	1	67	*1a/*1b(388A/G,521T/T)	E3/E4	1	1	0.94	5.21	1.47	3.32	1.47	1.16
1111	0	43	*1a/*1b(388A/G,521T/T)	E3/E3	1	0	2.94	8.82	1.2	1.73	1.19	2.17
1112	1	65	*1b/*15(388G/G,521T/C)	E3/E3	1	1	1.63	6.24	1	4.05
1113	1	62	*1a/*1a(388A/A,521T/T)	E3/E4	1	1	2.92	6.77	1.24	3.61	1.15	1.14
1114	1	65	*1a/*1b(388A/G,521T/T)	E3/E3	1	1	1.43	4.91	1.13	2.06	0.9	0.79
1115	0	65	*1b/*1b(388G/G,521T/T)	E3/E3	1	0	0.92	4.51	2.93	2.66
1116	1	75	*1b/*15(388G/G,521T/C)	E3/E4	1	1	1.09	8.91	0.99	1.98	0.89	0.71
1117	1	72	*1a/*1b(388A/G,521T/T)	E3/E3	1	0	1.05	6.4	2.83	2.92	0.82	0.38
1118	1	79	*1a/*1b(388A/G,521T/T)	E3/E4	1	1	1.2	6.49	0.94	1.73	1.01	0.69
1119	1	87	*1a/*1a(388A/A,521T/T)	E3/E3	1	1	2.74	4.58	0.97	2.28
1120	1	74	*1b/*1b(388G/G,521T/T)	E3/E3	1	1	0.93	4.37	0.94	1.77
1121	1	76	*1a/*1b(388A/G,521T/T)	E3/E3	1	1	0.86	4.53	1.1	1.82	0.94	0.53
1122	1	74	*1a/*1b(388A/G,521T/T)	E2/E3	1	1	1	6.38	1.86	2.8	0.89	1.34
1123	1	78	*1b/*1b(388G/G,521T/T)	E3/E3	1	1	0.76	3.55	1.88	1.92
1124	1	78	*1b/*1b(388G/G,521T/T)	E3/E4	1	1	0.7	6.88	0.65	1.59	0.76	0.5
1125	1	74	*5/*15(388A/G,521C/C)	E3/E3	1	1	0.74	3.25	1.13	1.47
1126	1	57	*1b/*1b(388G/G,521T/T)	E3/E3	1	1	0.74	6.05	1.09	1.3
1127	0	79	*1a/*15(388A/G,521T/C)	E2/E3	1	0	0.58	6.44	1.92	2.83	0.82	1.3
1128	1	78	*15/*15(388G/G,521C/C)	E3/E3	1	1	3.17	6.99	1.79	2.22	1.01	0.97
1129	1	45	*1b/*1b(388G/G,521T/T)	E3/E3	1	1	1.18	5.73	1.81	2.39	0.79	0.83
1130	1	63	*1b/*15(388G/G,521T/C)	E2/E3	1	1	4.66	4.15	1.71	2.56	0.27	0.96
1131	1	58	*1b/*1b(388G/G,521T/T)	E3/E3	1	1	1.84	4.99	1.94	1
1132	1	49	*1a/*1b(388A/G,521T/T)	E3/E3	1	1	2.23	5.12	0.96	3.18	0.9	1.12
1133	1	76	*1a/*15(388A/G,521T/C)	E3/E4	1	0	1.44	5.3	1.13	3.25	1.13	1.13
1134	0	60	*1b/*15(388G/G,521T/C)	E3/E3	1	0	1.87	4.34	2.57	2.51
1135	1	73	*1b/*15(388G/G,521T/C)	E3/E3	1	1	1.3	4.42	2.79	2.93
1136	1	50	*15/*15(388G/G,521C/C)	E3/E3	1	1	4	4.8	1.82	2.59	0.95	1
1137	1	72	*1a/*1a(388A/A,521T/T)	E3/E3	1	1	0.75	4.67	2.95	2.71
1138	1	61	*1a/*1b(388A/G,521T/T)	E3/E3	1	1	0.82	4.65	0.71	1.25	0.69	0.44
1139	1	86	*1a/*1b(388A/G,521T/T)	E3/E3	1	1	1.02	3.65	1.02	1.75	0.94	0.67
1140	1	75	*1b/*1b(388G/G,521T/T)	E3/E3	1	1	1.11	4.15	1.72	2.51
1141	1	70	*1a/*15(388A/G,521T/C)	E2/E4	1	1	1.12	3.71	1.16	1.64	0.85	0.57
1142	1	63	*1b/*1b(388G/G,521T/T)	E3/E3	1	1	2.68	6.07	1.07	3.7	1.12	1.38
1143	1	76	*1b/*1b(388G/G,521T/T)	E2/E3	1	1	0.99	6.29	1.7	2.85	0.78	1.37
1144	1	58	*1b/*1b(388G/G,521T/T)	E3/E4	1	1	1.62	6.97	1.87	2.07
1145	1	71	*1b/*1b(388G/G,521T/T)	E3/E3	1	1	0.72	5.2	1.98	1.6
1146	0	75	*1a/*1a(388A/A,521T/T)	E3/E3	1	0	0.66	4.19	1.05	1.49	0.85	0.46
1147	1	74	*1b/*15(388G/G,521T/C)	E2/E3	1	1	2.48	5.15	0.85	1.81		1.45
1148	0	59	*1a/*1b(388A/G,521T/T)	E3/E3	1	0	1.32	6.3	1.01	2.64	0.87	1.45
1149	1	67	*1b/*1b(388G/G,521T/T)	E2/E3	1	1	0.95	3.95	1.08	2.14	0.88	0.69
1150	1	73	*1b/*1b(388G/G,521T/T)	E2/E3	1	1	4.93	4.28	1.72	1.23	0.79	0.67
1151	0	60	*1b/*15(388G/G,521T/C)	E3/E3	1	0	0.69	3.46	1.01	1.9
1152	1	65	*1a/*1b(388A/G,521T/T)	E3/E4	1	1	1.27	6.04	0.8	1.42
1153	1	67	*1b/*1b(388G/G,521T/T)	E3/E3	1	1	1.89	3.61	0.96	1.93
1154	1	87	*1b/*1b(388G/G,521T/T)	E3/E3	1	1	1.56	3.77	0.79	1.89	0.76	0.76
1155	1	79	*1b/*1b(388G/G,521T/T)	E3/E4	1	1	1.47	5.17	0.97	3.17
1156	1	84	*1a/*1b(388A/G,521T/T)	E3/E3	1	1	1.22	3.72	0.82	2.06	0.8	0.74
1157	1	70	*1a/*1b(388A/G,521T/T)	E3/E3	1	1	0.77	4.81	0.96	1.12
1158	1	67	*1b/*15(388G/G,521T/C)	E3/E4	1	1	2.31	5.76	0.79	2.14	0.9	0.72
1159	0	33	*1b/*1b(388G/G,521T/T)	E2/E3	1	0	4	4.33	1	1.67	1.34	0.69
1160	1	65	*1b/*1b(388G/G,521T/T)	E3/E4	1	1	3.18	6.73	0.81	2.61
1161	1	61	*1b/*1b(388G/G,521T/T)	E3/E3	1	1	1.67	4.29	1.04	2.46
1162	0	65	*1b/*1b(388G/G,521T/T)	E3/E4	1	0	0.47	6.3	0.84	2.79
1163	1	73	*1b/*15(388G/G,521T/C)	E3/E3	1	1	1.44	4.38	1.68	2.84
1164	1	58	*1b/*1b(388G/G,521T/T)	E2/E3	1	1	6.51	8.01	0.79	3.21
1165	1	59	*1b/*1b(388G/G,521T/T)	E3/E3	1	1	1.18	4.73	0.9	3.16	0.98
1166	1	72	*1b/*1b(388G/G,521T/T)	E2/E3	1	1	1.35	5.27	1.04	2.99	1.01	1.04
1167	1	55	*1a/*1a(388A/A,521T/T)	E2/E3	1	1	1.09	4.55	1.36	2.22	1.15	0.8
1168	0	51	*1a/*1b(388A/G,521T/T)	E2/E3	1	0	5.21	4.58	1.8	1.78
1169	1	79	*1b/*1b(388G/G,521T/T)	E3/E4	1	1	1.73	4.7	0.89	2.69	0.89	0.89
1170	1	84	*1a/*1b(388A/G,521T/T)	E3/E3	1	1	1.77	6.16	1.25	3.97	1.24	1.32
1171	1	70	*1b/*1b(388G/G,521T/T)	E3/E3	1	1	2.31	7.01	1.18	2.08
1172	1	56	*1a/*1b(388A/G,521T/T)	E3/E3	1	1	2.22	3.34	0.64	1.55
1173	0	76	*1a/*1b(388A/G,521T/T)	E3/E3	1	0	2.81	4.88	0.97	3.21	1.05	1.01
1174	1	63	*1b/*1b(388G/G,521T/T)	E3/E3	1	0	2.03	4.57	0.98	2.44	1.08
1175	1	76	*1a/*1b(388A/G,521T/T)	E4/E4	1	0	1.58	4.38	0.96	2.13	1
1176	0	64	*1b/*15(388G/G,521T/C)	E3/E3	1	0	0.44	4.2	1.31	2.23	1.23	0.68
1177	1	78	*1b/*1b(388G/G,521T/T)	E2/E3	1	0	1.33	5.57	1.13	3.23	1.26	1.07
1178	1	84	*1b/*1b(388G/G,521T/T)	E3/E3	1	1	1.14	5.15	1.12	3.15	1.16	0.98
1179	1	63	*1b/*1b(388G/G,521T/T)	E3/E3	1	0	0.89	3.56	1.6	1.21
1180	0	72	*1b/*1b(388G/G,521T/T)	E3/E3	1	0	1.42	7.33	1.34	2.25	0.88	1.62
1181	1	54	*1a/*1b(388A/G,521T/T)	E3/E4	1	1	1.42	4.75	0.97	2.84	0.64	0.63
1182	1	58	*1b/*1b(388G/G,521T/T)	E3/E4	1	1	1.19	3.78	0.73	2.11	0.85	0.72
1183	1	73	*1b/*15(388G/G,521T/C)	E3/E3	1	1	2.88	5.91	0.63	2.16	0.7	0.87
1184	1	35	*1b/*15(388G/G,521T/C)	E3/E3	1	0	1.72	4.5	1.07	2.38	1.2	1.89
1185	1	95	*1b/*1b(388G/G,521T/T)	E3/E3	1	1	0.88	4.59	0.57	1.24	0.71	0.44
1186	1	73	*1a/*1b(388A/G,521T/T)	E3/E4	1	0	2.28	7.18	1.21	4.6	1.13	1.65
1187	1	57	*1b/*1b(388G/G,521T/T)	E3/E4	1	1	4.44	4.88	1.01	4.7	1.26	0.74
1188	1	65	*1a/*15(388A/G,521T/C)	E3/E3	1	1	1.19	3.84	0.68	2.46
1189	1	65	*1b/*15(388G/G,521T/C)	E3/E3	1	1	0.68	3.82	0.88	2.24	0.89	0.77
1190	1	57	*1a/*1a(388A/A,521T/T)	E3/E3	1	1	4.73	4.33	1.06	1.36	1.15	0.76
1191	1	53	*1b/*1b(388G/G,521T/T)	E2/E3	1	0	2.57	4.35	1.04	2.29	1.18	1.76
1192	1	55	*1b/*1b(388G/G,521T/T)	E3/E3	1	1	1.19	4.17	0.39	1.14	0.35	0.48
1193	1	79	*1b/*1b(388G/G,521T/T)	E3/E4	1	1	2.36	4.67	0.97	2.92
1194	1	82	*1b/*1b(388G/G,521T/T)	E2/E3	1	1	0.98	4.23	1.47	1.9	1.28	1.37
1195	1	55	*1b/*15(388G/G,521T/C)	E2/E3	1	1	1.3	4.74	1.93	3.11	0.95	1.85
1196	1	46	*1a/*1b(388A/G,521T/T)	E3/E3	1	1	2.57	4.56	0.73	2.95	0.78	1.01
1197	1	57	*1b/*15(388G/G,521T/C)	E3/E3	1	0	1.94	4.3	1.9	1.92
1198	1	81	*1b/*1b(388G/G,521T/T)	E3/E3	1	1	3.15	3.32	1.78	1.2	0.94	0.66
1199	1	59	*1b/*1b(388G/G,521T/T)	E2/E3	1	1	0.7	4.51	1.84	0.98
1200	1	96	*1b/*1b(388G/G,521T/T)	E3/E3	1	1	0.88	3.47	1.89	1.81	0.86	0.54
1201	0	53	*1b/*1b(388G/G,521T/T)	E3/E3	1	0	3.3	4.18	1.79	1.53	1.07	0.66
1202	1	73	*1a/*1b(388A/G,521T/T)	E2/E3	1	1	2.02	4.62	1.06	2.71
1203	1	69	*1b/*15(388G/G,521T/C)	E3/E3	1	1	2.02	4.62	1.06	2.71	1.24	0.93
1204	1	86	*1b/*1b(388G/G,521T/T)	E3/E3	1	1	1.3	5.31	0.92	1.84	0.85	0.64
1205	1	70	*1a/*1b(388A/G,521T/T)	E2/E3	1	1	1.8	3.17	1.98	2.13	1.04	1.5
1206	1	58	*1b/*1b(388G/G,521T/T)	E2/E3	1	0	1.93	4.21	1.86	2.44	0.97	0.88
1207	1	83	*1b/*1b(388G/G,521T/T)	E3/E3	1	1	0.89	6.82	0.71	1.57	0.77	0.53
1208	1	52	*1b/*1b(388G/G,521T/T)	E3/E3	1	0	1.6	5.58	1.18	3.78	1.13	1.17
1209	1	55	*1a/*1b(388A/G,521T/T)	E3/E3	1	0	4.56	6.19	1.22	2.96	1.26	1.24
1210	1	66	*1a/*1a(388A/A,521T/T)	E3/E3	1	1	0.85	4.39	0.93	2.98	0.91	0.92
1211	1	77	*1a/*1a(388A/A,521T/T)	E3/E3	1	1	1.33	4.88	1.02	3.23	1.07	1.07
1212	1	78	*1b/*1b(388G/G,521T/T)	E3/E3	1	1	0.55	3.42	0.92	1.96
1213	1	61	*1b/*1b(388G/G,521T/T)	E3/E3	1	0	3.35	5.27	1.22	3.55
1214	1	69	*1b/*1b(388G/G,521T/T)	E3/E4	1	1	0.58	5.62	1.24	1.83	1.09
1215	1	78	*1b/*1b(388G/G,521T/T)	E3/E3	1	0	1.6	6.14	1.45	3.68	1.17	1.24
1216	1	77	*1a/*1a(388A/A,521T/T)	E3/E3	1	1	1.1	7.24	1.76	2.67	1.33	1.5
1217	1	57	*1b/*1b(388G/G,521T/T)	E3/E3	1	1	1.14	4.66	0.81	1.45
1218	1	81	*1a/*1b(388A/G,521T/T)	E2/E3	1	1	0.88	3.07	1.85	2.56	0.76	1.62
1219	1	64	*1a/*1b(388A/G,521T/T)	E4/E4	1	1	0.81	4.79	1.12	3.02	0.99
1220	0	70	*1b/*1b(388G/G,521T/T)	E3/E3	1	0	0.64	4.04	1.25	2.41	1.09	0.74
1221	1	82	*1a/*1b(388A/G,521T/T)	E3/E3	1	1	0.95	4.25	1.57	1.92	0.94
1222	1	51	*1b/*1b(388G/G,521T/T)	E3/E3	1	1	4.57	4.31	1.25	1.72
1223	1	82	*1a/*1b(388A/G,521T/T)	E3/E3	1	1	1.25	3.33	0.85	1.76	0.85	0.72
1224	1	51	*1b/*1b(388G/G,521T/T)	E2/E3	1	1	2.4	4.8	0.97	2.11	0.95	0.87
1225	1	79	*1b/*1b(388G/G,521T/T)	E3/E4	1	1	1.53	4.25	1.21	2.34
1226	1	72	*1a/*1a(388A/A,521T/T)	E3/E3	1	1	0.94	3.71	1.37	1.82	0.83	0.79
1227	1	68	*1a/*1b(388A/G,521T/T)	E2/E3	1	0	1.48	4.39	0.9	1.9
1228	1	81	*1b/*1b(388G/G,521T/T)	E3/E3	1	1	2.2	3.68	0.89	1.84	0.83	0.83
1229	1	85	*1b/*1b(388G/G,521T/T)	E3/E3	1	1	1.66	4.96	1.66	1.48	0.88	0.6
1230	1	76	*1a/*1b(388A/G,521T/T)	E3/E3	1	1	0.7	4.97	0.74	1.63
1231	1	52	*1b/*1b(388G/G,521T/T)	E3/E3	1	1	1.22	4.79	0.99	2.91	1.07
1232	1	70	*1a/*1a(388A/A,521T/T)	E3/E3	1	1	1.6	3.34	0.61	2.13
1233	1	66	*1b/*1b(388G/G,521T/T)	E3/E3	1	1	1.86	3.49	0.87	1.94	0.96	0.71
1234	1	59	*1a/*1a(388A/A,521T/T)	E3/E3	1	1	0.92	4.01	1.56	1.73	1.3	0.6
1235	1	83	*1a/*1b(388A/G,521T/T)	E3/E3	1	1	1.28	5.59	1.36	3.51	1.31	1.23
1236	1	70	*1b/*15(388G/G,521T/C)	E3/E3	1	1	0.83	4.26	1.1	1.68	1.14	1.17
1237	1	71	*1b/*1b(388G/G,521T/T)	E3/E3	1	1	1.22	5.13	0.93	3.31	0.9	1.11
1238	0	57	*1a/*15(388A/G,521T/C)	E3/E4	1	0	1.65	4.84	1.07	2.22	1.19	1.3
1239	1	77	*1b/*1b(388G/G,521T/T)	E3/E3	1	1	0.9	4.04	0.9	2.85	0.89	0.93
1240	1	63	*1a/*1b(388A/G,521T/T)	E3/E3	1	1	2.86	6.19	0.88	2.3	0.87	1.52
1241	1	57	*1a/*1b(388A/G,521T/T)	E3/E4	1	1	3.46	7.6	0.78	4.91
1242	0	76	*1b/*1b(388G/G,521T/T)	E3/E3	1	0	1.02	4.19	0.77	1.67	0.92	0.56
1243	1	82	*1a/*1b(388A/G,521T/T)	E3/E3	1	1	1.68	3.97	0.81	2.18	0.91	0.74
1244	0	69	*1a/*1b(388A/G,521T/T)	E2/E3	1	0	0.5	2.6	0.87	1.15	0.55	1.43
1245	1	86	*1b/*1b(388G/G,521T/T)	E3/E3	1	1	2.81	3.78	0.94	1.89	0.94	0.67
1246	1	84	*1b/*15(388G/G,521T/C)	E3/E3	1	1	4.09	5.1	0.9	3	0.96	1.09
1247	1	57	*1b/*1b(388G/G,521T/T)	E3/E4	1	1	0.88	6.9	0.65	3.55	0.62	0.56
1248	1	73	*1b/*1b(388G/G,521T/T)	E3/E3	1	1	1.28	4.38	1.18	2.11	1.21	0.73
1249	1	46	*1b/*1b(388G/G,521T/T)	E3/E4	1	0	11.3	8.3	0.83	3.23	0.16
1250	1	60	*1b/*15(388G/G,521T/C)	E3/E4	1	0	1.05	6.06	1.24	2.31	1.23	1.41
1251	1	91	*1b/*15(388G/G,521T/C)	E3/E4	1	1	0.95	4.97	0.83	1.46	0.85	0.55
1252	1	87	*1a/*1a(388A/A,521T/T)	E2/E3	1	1	1.8	4.66	1.11	2.63
1253	0	58	*1a/*1b(388A/G,521T/T)	E3/E3	1	0	1.04	3.59	1.18	2.04	1.05	0.68
1254	1	82	*1b/*1b(388G/G,521T/T)	E3/E3	1	1	1.24	3.16	1.95	1.56	1.01	0.58
1255	1	61	*1b/*1b(388G/G,521T/T)	E3/E4	1	1	2.49	5.84	1	3.86	1.06	1.28
1256	1	68	*1a/*1b(388A/G,521T/T)	E3/E3	1	1	0.51	3.08	1.07	1.66	0.86	0.56
1257	1	57	*1a/*1b(388A/G,521T/T)	E3/E3	1	1	0.92	5.22	1.24	3.09
1258	1	63	*1b/*1b(388G/G,521T/T)	E3/E3	1	1	1.35	4.32	0.84	1.88
1259	0	66	*1a/*15(388A/G,521T/C)	E3/E3	1	0	1.19	5.2	1.04	3.48
1260	1	49	*1a/*1b(388A/G,521T/T)	E3/E3	1	1	1.05	3.66	1.21	1.56	0.91	0.98
1261	1	46	*1b/*15(388G/G,521T/C)	E3/E3	1	1	1.33	4.76	1.01	3.25	1.05	1.05
1262	1	72	*1a/*1b(388A/G,521T/T)	E3/E3	1	1	0.6	3.21	0.53	2.37
1263	0	77	*1a/*1b(388A/G,521T/T)	E3/E3	1	0	0.71	3.03	1.05	1.52
1264	1	70	*1b/*15(388G/G,521T/C)	E3/E3	1	1	0.51	4.75	0.99	3.24	0.43	1.02
1265	1	64	*1b/*1b(388G/G,521T/T)	E3/E3	1	1	0.6	4.96	0.9	1.46
1266	1	50	*1b/*1b(388G/G,521T/T)	E3/E4	1	1	1.04	4.74	1.83	2.16	0.79	0.76
1267	0	83	*1a/*1b(388A/G,521T/T)	E3/E3	1	0	0.69	4.38	0.85	0.96	0.66	0.53
1268	0	78	*1b/*1b(388G/G,521T/T)	E3/E4	1	0	1.2	4.94	1.09	2.76	0.91	0.85
1269	0	55	*1b/*1b(388G/G,521T/T)	E3/E3	1	0	1.16	4.2	1.05	2.74	0.87	0.43
1270	0	67	*1a/*1b(388A/G,521T/T)	E3/E3	1	0	2.83	6.36	1.23	3.59	0.54	0.6
1271	0	77	*1a/*1b(388A/G,521T/T)	E3/E4	1	0	2.81	4.4	0.87	2.34
1272	0	62	*1b/*15(388G/G,521T/C)	E3/E4	1	0	2.51	4.53	0.88	2.62
1273	1	69	*1b/*1b(388G/G,521T/T)	E3/E3	1	1	2.32	6.92	1.28	4.51
1274	1	78	*1a/*1a(388A/A,521T/T)	E3/E3	1	1	1.29	3.38	0.93	1.94	0.89	0.48
1275	1	80	*1a/*1b(388A/G,521T/T)	E3/E4	1	1	1.9	4.09	1.63	3.36
1276	0	81	*1b/*1b(388G/G,521T/T)	E3/E3	1	0	0.99	4.85	0.75	3.89	1.11	1.61
1277	1	83	*1b/*1b(388G/G,521T/T)	E3/E3	1	0	2.84	5.5	1.84	2.52
1278	1	61	*1b/*1b(388G/G,521T/T)	E3/E4	1	1	0.6	4.98	0.68	2.99	0.44	0.54
1279	1	70	*1b/*1b(388G/G,521T/T)	E3/E3	1	1	1.47	3.04	0.87	1.62	0.65	1.02
1280	1	58	*1b/*1b(388G/G,521T/T)	E3/E3	1	1	0.83	2.52	0.81	1.57	0.75	0.78
1281	1	82	*1a/*1b(388A/G,521T/T)	E3/E3	1	1	1.87	5.03	1.28	3.34	0.79	0.51
1282	1	78	*1b/*1b(388G/G,521T/T)	E3/E3	1	1	0.48	2.53	0.86	1.61	0.97	0.6
1283	1	67	*1b/*1b(388G/G,521T/T)	E3/E3	1	1	1.09	3.15	0.95	1.7	0.84	1.06
1284	0	78	*1b/*1b(388G/G,521T/T)	E3/E4	1	0	1.07	4.16	0.75	3.12	0.86	0.56
1285	1	82	*1b/*1b(388G/G,521T/T)	E3/E3	1	1	1.67	4.99	1.25	3.37
1286	1	72	*1a/*1b(388A/G,521T/T)	E3/E3	1	0	0.52	4.13	1.59	2.18	1.03	0.87
1287	1	62	*1b/*1b(388G/G,521T/T)	E3/E3	1	1	0.96	5.06	1.17	3.83
1288	1	68	*1b/*15(388G/G,521T/C)	E3/E3	1	1	0.66	3.8	1.3	2.17	1.11	1.14
1289	1	65	*1a/*1a(388A/A,521T/T)	E3/E3	1	1	0.87	4.42	1.71	2.24
1290	1	65	*1b/*1b(388G/G,521T/T)	E3/E3	1	1	0.62	3.48	1.15	2.09	1.11	1.52
1291	1	60	*1a/*1b(388A/G,521T/T)	E3/E3	1	1	0.75	3.86	1.22	1.92	1.02	1.04
1292	1	61	*1b/*1b(388G/G,521T/T)	E3/E3	1	0	0.63	4.69	1.09	1.24	1.12	1.42
1293	1	57	*1a/*1b(388A/G,521T/T)	E3/E3	1	1	1.42	3.56	1.25	1.78	1.05	0.58
1294	0	43	*1b/*1b(388G/G,521T/T)	E3/E4	1	0	0.88	4.43	1.05	3.35	0.87	0.56
1295	1	79	*1b/*1b(388G/G,521T/T)	E3/E3	1	1	4.27	4.02	0.88	2.31
1296	1	83	*1b/*1b(388G/G,521T/T)	E2/E3	1	1	2.41	4.92	1.53	3.42	1.13	0.9
1297	1	79	*1a/*1b(388A/G,521T/T)	E3/E3	1	1	3.54	5.98	1.45	3.47	1.04	0.56
1298	1	67	*1b/*15(388G/G,521T/C)	E3/E3	1	1	0.4	3.11	1.19	1.64	0.89	1.17
1299	0	83	*1a/*1b(388A/G,521T/T)	E3/E3	1	0	0.82	4.76	1.17	3.3	0.85	0.61
1300	1	73	*1b/*1b(388G/G,521T/T)	E3/E4	1	1	0.98	5.07	0.99	3.97	0.9	1.56
1301	0	78	*1b/*1b(388G/G,521T/T)	E3/E4	1	0	0.62	2.23	0.92	4.01
1302	1	67	*1b/*1b(388G/G,521T/T)	E3/E3	1	1	0.92	3.85	1.4	1.98	1.13	1.33
1303	1	65	*1b/*1b(388G/G,521T/T)	E3/E4	1	1	0.81	4.08	1.01	4.81	1.12	0.19
1304	1	73	*1b/*1b(388G/G,521T/T)	E3/E4	1	1	0.63	6.95	0.86	1.81	0.8	0.88
1305	1	59	*1a/*1a(388A/A,521T/T)	E3/E3	1	1	1.39	3.44	1.01	1.88	0.26	1.34
1306	1	79	*1a/*1b(388A/G,521T/T)	E3/E3	1	1	3.54	5.98	1.45	3.47
1307	1	43	*1a/*1b(388A/G,521T/T)	E2/E3	1	1	1.55	4.78	1.76	2.32
1308	1	51	*1a/*1b(388A/G,521T/T)	E3/E3	1	1	1.15	2.3	0.69	0.95	1.23	0.7
1309	1	76	*1a/*1b(388A/G,521T/T)	E3/E4	1	1	1.46	4.42	1.25	2.57	1.01	0.89
1310	1	62	*1b/*15(388G/G,521T/C)	E3/E3	1	1	0.97	3.1	1.01	1.76	0.87	1.09
1311	1	48	*1a/*1b(388A/G,521T/T)	E3/E3	1	1	0.83	4.69	0.98	1.28	0.65	1.35
1312	1	41	*1b/*1b(388G/G,521T/T)	E3/E3	1	0	0.5	4.54	1.5	2.78	0.89	1.02
1313	1	87	*1b/*15(388G/G,521T/C)	E3/E3	1	1	1.47	4.47	1.2	2.6	0.91	1.01
1314	0	32	*1a/*1b(388A/G,521T/T)	E2/E3	1	0	1.1	3.39	1.02	1.89
1315	1	54	*1a/*1b(388A/G,521T/T)	E3/E3	1	0	1	4.39	1.2	2.91	0.65	0.91
1316	0	44	*1b/*15(388G/G,521T/C)	E3/E4	1	0	0.93	6.99	0.67	4.94	1.04	1.23
1317	1	74	*1a/*1b(388A/G,521T/T)	E3/E3	1	1	0.95	5.9	1.42	2.63	0.77	0.82
1318	1	57	*1a/*1b(388A/G,521T/T)	E3/E3	1	1	0.97	4.48	1.21	2.91	0.92	1.18
1319	1	60	*1a/*1b(388A/G,521T/T)	E3/E3	1	1	0.56	2.82	1.12	1.44
1320	1	67	*1a/*1b(388A/G,521T/T)	E3/E3	1	1	1.17	3.75	0.62	2.5
1321	1	74	*1b/*1b(388G/G,521T/T)	E2/E3	1	1	0.53	2.96	1.08	1.73	0.81	0.73
1322	1	84	*1b/*15(388G/G,521T/C)	E3/E4	1	1	1	4.44	1.01	3.06	0.83	0.48
1323	1	93	*1a/*1b(388A/G,521T/T)	E3/E4	1	1	0.6	7.55	1.82	1.37	1.53	0.66
1324	1	57	*1b/*15(388G/G,521T/C)	E2/E3	1	1	3.35	4.34	1.02	2.45
1325	1	44	*1a/*1b(388A/G,521T/T)	E3/E3	1	1	0.7	4.1	1.07	2.86	0.82	0.68
1326	1	72	*1a/*1b(388A/G,521T/T)	E3/E3	1	1	0.69	2.12	1.36	1.45
1327	1	70	*1b/*1b(388G/G,521T/T)	E3/E3	1	1	1.41	2.73	0.78	1.01	0.97	1
1328	1	60	*1a/*1b(388A/G,521T/T)	E3/E3	1	1	0.65	5.22	1.51	2.97	0.91	0.8
1329	1	46	*1a/*1b(388A/G,521T/T)	E3/E3	1	1	1.75	3.57	1.01	1.83	1.01	1.35
1330	1	51	*1b/*1b(388G/G,521T/T)	E3/E3	1	1	1.08	3.12	1.05	1.37	1.08	0.62
1331	1	73	*1b/*15(388G/G,521T/C)	E3/E3	1	1	1.15	3.09	0.6	1.98	0.56	0.48
1332	0	84	*1a/*1b(388A/G,521T/T)	E3/E3	1	0	1.42	4.79	0.76	3.32
1333	1	62	*1b/*1b(388G/G,521T/T)	E3/E3	1	1	1.25	3.88	0.9	2.46
1334	1	74	*1a/*1b(388A/G,521T/T)	E3/E3	1	1	0.9	4.05	1.85	1.36	0.76	0.99
1335	1	82	*1a/*15(388A/G,521T/C)	E4/E4	1	0	0.49	3.57	1.31	4.5	1.04	0.34
1336	0	31	*1a/*1b(388A/G,521T/T)	E3/E3	1	0	2.48	3.73	0.82	1.94
1337	1	80	*1a/*1a(388A/A,521T/T)	E3/E3	1	1	2.16	4.73	0.92	3.09	1.09	0.78
1338	1	79	*1a/*1b(388A/G,521T/T)	E3/E3	1	1	2.28	4.55	0.93	2.6	0.95	0.49
1339	0	57	*1b/*1b(388G/G,521T/T)	E3/E3	1	0	0.95	4.97	1.34	3.11
1340	1	82	*1a/*1b(388A/G,521T/T)	E3/E3	1	1	0.85	2.78	0.95	1.42	0.99	0.7
1341	1	83	*1a/*1b(388A/G,521T/T)	E3/E3	1	1	0.8	5.02	0.93	3.8	0.91	0.66
1342	1	90	*1a/*1b(388A/G,521T/T)	E3/E3	1	1	0.57	4.54	1.17	2.98
1343	1	68	*1b/*1b(388G/G,521T/T)	E3/E3	1	1	1.2	5.93	1.47	3.82
1344	1	60	*1b/*1b(388G/G,521T/T)	E3/E3	1	1	2.47	6.52	1.3	3.87
1345	1	82	*1a/*1b(388A/G,521T/T)	E3/E3	1	1	0.96	4.66	0.89	3.4	0.74	0.61
1346	1	80	*1a/*1a(388A/A,521T/T)	E3/E3	1	1	1.61	4.73	1.08	2.95
1347	1	66	*1a/*1b(388A/G,521T/T)	E3/E4	1	1	2.44	5.87	1.65	3.8	1.11	1.07
1348	0	51	*1a/*1a(388A/A,521T/T)	E3/E3	1	0	0.74	3.63	1.71	1.51	0.91	0.77
1349	0	56	*1a/*1b(388A/G,521T/T)	E3/E4	1	0	1.34	5.41	1.26	3.31	0.9	0.64
1350	1	66	*1b/*15(388G/G,521T/C)	E3/E3	1	1	1.54	3.61	0.66	2.22
1351	1	85	*1b/*1b(388G/G,521T/T)	E3/E3	1	1	1.38	4.09	1.22	2.24	1.07	1.4
1352	1	80	*1a/*1b(388A/G,521T/T)	E3/E3	1	1	0.67	3.63	0.98	2.02	0.93	0.46
1353	0	36	*1a/*1b(388A/G,521T/T)	E3/E3	1	0	0.84	4.3	1.04	2.49	1.03	0.7
1354	1	73	*1b/*1b(388G/G,521T/T)	E3/E4	1	1	0.88	5.3	1.29	3.34	0.87	0.86
1355	1	78	*1b/*1b(388G/G,521T/T)	E3/E3	1	1	2.1	5.97	0.29	4.17	0.87	0.71
1356	1	83	*1a/*1b(388A/G,521T/T)	E3/E3	1	0	3.53	5.4	1.04	3.3	1.04	1.26
1357	0	61	*1b/*15(388G/G,521T/C)	E3/E3	1	0	1.34	3.03	0.85	1.43
1358	1	60	*1b/*1b(388G/G,521T/T)	E3/E3	1	1	0.67	5.03	1.63	2.67	0.78	0.86
1359	1	58	*1b/*1b(388G/G,521T/T)	E2/E3	1	1	1.16	2.75	1.71	2.38	0.91	0.53
1360	0	66	*1b/*1b(388G/G,521T/T)	E3/E3	1	0	0.96	4.55	1.17	2.63	0.7	0.66
1361	0	68	*1a/*1b(388A/G,521T/T)	E3/E3	1	0	1.33	6.01	1.26	4.17
1362	1	78	*1a/*1b(388A/G,521T/T)	E3/E3	1	1	1.65	4.37	0.8	2.51	0.43	0.47
1363	0	64	*1b/*1b(388G/G,521T/T)	E2/E3	1	0	0.34	3.43	1.14	1.74	1.07	0.63
1364	0	46	*1b/*15(388G/G,521T/C)	E2/E3	1	0	2.64	5.24	0.96	3.13
1365	1	70	*1b/*15(388G/G,521T/C)	E2/E3	1	1	0.91	5.04	1.3	3.06	1.29	1.01
1366	1	92	*1a/*1b(388A/G,521T/T)	E3/E4	1	1	2.58	4.83	1.08	2.53	1.36	0.4
1367	1	86	*1b/*1b(388G/G,521T/T)	E3/E3	1	1	0.84	3.46	1.15	1.49	1.04	0.62
1368	1	70	*1b/*15(388G/G,521T/C)	E3/E3	1	1	0.69	3.02	0.8	1.59	0.64	0.43
1369	1	68	*1b/*1b(388G/G,521T/T)	E3/E3	1	1	1.99	3.05	0.73	1.28	0.81	0.47
1370	1	70	*1b/*1b(388G/G,521T/T)	E2/E3	1	1	1.8	5.55	1.5	2.93	0.64	0.46
1371	1	81	*1b/*15(388G/G,521T/C)	E3/E3	1	1	1.61	4.25	1.13	2.48	0.94	0.63
1372	1	87	*1b/*1b(388G/G,521T/T)	E3/E3	1	1	1.77	2.63	0.67	1.37	0.86	0.69
1373	1	62	*1a/*1b(388A/G,521T/T)	E3/E3	1	0	0.59	3.51	0.86	1.97	0.33	0.49
1374	0	57	*1a/*1a(388A/A,521T/T)	E2/E3	1	0	3.07	5.77	0.99	2.79	0.94	0.79
1375	1	53	*1a/*1a(388A/A,521T/T)	E3/E4	1	1	1.69	4.12	1.93	2.31	0.35	0.36
1376	0	80	*1a/*1b(388A/G,521T/T)	E3/E4	1	0	3.07	5.77	0.99	2.79	0.91	0.76
1377	1	87	*1b/*1b(388G/G,521T/T)	E3/E3	1	1	1.69	4.12	1.93	2.31
1378	1	80	*1a/*1b(388A/G,521T/T)	E3/E3	1	1	1.08	4.32	1.67	3.08	1.05	0.51
1379	1	80	*1b/*1b(388G/G,521T/T)	E3/E3	1	1	0.39	0.51	1.06	1.12	1.4	0.84
1380	1	72	*1b/*1b(388G/G,521T/T)	E2/E3	1	1	0.65	4.2	1.65	2.05
1381	1	63	*1b/*15(388G/G,521T/C)	E3/E3	1	1	1.43	5.7	1.88	4.28
1382	1	82	*1a/*1b(388A/G,521T/T)	E2/E4	1	0	1.07	4.53	1.72	2.99
1383	0	87	*1a/*1b(388A/G,521T/T)	E3/E3	1	0	0.9	3.08	1.67	1.78	0.1	1.45
1384	1	96	*1b/*1b(388G/G,521T/T)	E2/E4	1	0	1.36	5.56	1.81	3.22	1.18	0.71
1385	0	29	*1a/*1b(388A/G,521T/T)	E3/E3	1	1	0.99	5.18	1.61	3.1
1386	1	65	*1b/*1b(388G/G,521T/T)	E3/E3	1	1	0.42	4.12	1.5	2.12	0.92	0.67
1387	0	59	*1b/*1b(388G/G,521T/T)	E3/E4	1	1	0.91	4.44	1.3	2.39
1388	1	73	*1a/*1b(388A/G,521T/T)	E2/E3	1	1	1.28	3.55	0.72	2.02
1389	0	67	*1a/*1b(388A/G,521T/T)	E3/E3	1	0	1.17	5.28	1.47	3.56
1390	1	54	*1a/*1b(388A/G,521T/T)	E3/E3	1	0	0.68	3.3	0.96	1.58	0.75	1.14
1391	1	81	*1b/*1b(388G/G,521T/T)	E3/E4	1	1	1.39	4.21	0.95	2.8	1.28	1.59
1392	1	78	*1b/*1b(388G/G,521T/T)	E2/E3	1	1	2.66	3.35	0.91	2.2
1393	1	70	*1a/*1b(388A/G,521T/T)	E3/E3	1	0	1.05	3.42	0.79	2.13	1.35	0.59
1394	0	71	*1a/*1b(388A/G,521T/T)	E3/E3	1	0	1.77	4.01	1.22	2.14
1395	1	82	*1a/*15(388A/G,521T/C)	E4/E4	1	0	0.71	6.78	0.95	2.55	0.87	0.92
1396	1	62	*1a/*1b(388A/G,521T/T)	E3/E3	1	0	0.59	3.51	0.86	1.97
1397	0	79	*1a/*1b(388A/G,521T/T)	E3/E3	1	1	1.78	6.46	1.61	4.56	0.6	0.6
1398	0	75	*1b/*15(388G/G,521T/C)	E3/E3	1	1	4.36	8.53	0.96	4.45	0.42	0.77
1399	1	72	*1b/*15(388G/G,521T/C)	E3/E3	1	1	2.02	4.23	0.77	2.5	1.23	0.97
1400	1	88	*1b/*1b(388G/G,521T/T)	E2/E3	1	1	1.02	5.31	1.33	3.7
1401	1	86	*1b/*15(388G/G,521T/C)	E3/E3	1	1	1.84	4.33	1.28	2.52
1402	1	74	*1a/*1b(388A/G,521T/T)	E3/E3	1	1	0.77	5.13	1.44	2.14	0.52	0.45
1403	1	65	*1a/*1b(388A/G,521T/T)	E3/E3	1	1	1.6	4.98	1.26	2.84	0.67	0.68
1404	0	75	*1b/*15(388G/G,521T/C)	E3/E4	1	1	17.64	4.32	0.65	4.17
1405	1	67	*1b/*15(388G/G,521T/C)	E3/E3	1	0	6.31	6.16	1.16	3.22	1.23	1.2
1406	1	82	*1a/*15(388A/G,521T/C)	E4/E4	1	0	0.58	3.35	1.03	1.82	1.01	1.08
1407	0	74	*1b/*1b(388G/G,521T/T)	E2/E4	1	0	0.51	3.65	1.14	2.22
1408	0	60	*1b/*1b(388G/G,521T/T)	E3/E3	1	1	2.35	4.19	0.87	2.33
1409	1	47	*1b/*1b(388G/G,521T/T)	E3/E3	1	0	1.4	5.13	1.65	2.97	0.73	0.92
1410	1	79	*1a/*1b(388A/G,521T/T)	E3/E3	1	1	0.39	0.51	0.06	1.12
1411	0	67	*1b/*1b(388G/G,521T/T)	E3/E3	1	1	1.11	3.13	0.92	1.79
1412	0	68	*1a/*1b(388A/G,521T/T)	E3/E3	1	1	1.6	3.46	0.89	1.75	0.55	0.4
1413	0	89	*1b/*1b(388G/G,521T/T)	E3/E3	1	1	1.1	4.68	1.12	3.16
1414	1	66	*1b/*1b(388G/G,521T/T)	E3/E3	1	1	0.46	2.78	1.22	1.9	0.36	0.73
1415	1	74	*1b/*15(388G/G,521T/C)	E2/E3	1	1	0.75	3.04	0.99	2.45	0.48	0.35
1416	0	67	*1a/*1b(388A/G,521T/T)	E3/E3	1	1	0.48	3.25	1.08	1.73	1.18	0.71
1417	0	77	*1a/*1b(388A/G,521T/T)	E3/E3	1	0	3.24	3.87	0.85	1.73	0.66	0.88
1418	1	69	*1a/*1a(388A/A,521T/T)	E3/E3	1	0	1.35	4.23	1.06	2.3	1.03	0.35
1419	1	62	*1a/*1b(388A/G,521T/T)	E3/E3	1	0	0.83	3.87	0.79	2.35
1420	1	75	*1b/*1b(388G/G,521T/T)	E3/E3	1	1	2.42	5.35	1.43	2.94	0.65	0.86
1421	1	78	*1a/*1b(388A/G,521T/T)	E3/E3	1	1	7.68	6.17	0.88	2.08
1422	0	73	*1b/*15(388G/G,521T/C)	E3/E3	1	1	0.83	5.93	2.64	2.43
1423	1	65	*1b/*1b(388G/G,521T/T)	E3/E3	1	0	2.18	5.55	1.2	3.09
1424	0	75	*1b/*1b(388G/G,521T/T)	E3/E3	1	0	0.74	4.05	1.01	2.37	0.84	0.41
1425	0	61	*1b/*15(388G/G,521T/C)	E3/E3	1	1	0.59	2.17	0.55	1.06	0.89	1.25
1426	0	63	*1b/*15(388G/G,521T/C)	E2/E3	1	1	1.73	4.29	1.25	2.34	0.87	0.58
1427	1	79	*1a/*1b(388A/G,521T/T)	E3/E3	1	1	1.54	5.28	1.34	3.23	0.86	0.55
1428	0	68	*1b/*1b(388G/G,521T/T)	E3/E3	1	1	0.89	4.44	1.16	2.55	0.78	0.61
1429	0	79	*1b/*1b(388G/G,521T/T)	E3/E3	1	1	2.56	5.12	1.19	2.82	0.88	0.77
1430	0	55	*1a/*15(388A/G,521T/C)	E3/E3	1	1	1.31	3.99	0.77	2.39	0.98	1.27
1431	0	70	*1b/*1b(388G/G,521T/T)	E3/E3	1	1	0.87	5.16	1.41	3
1432	1	68	*1a/*1b(388A/G,521T/T)	E3/E3	1	0	2.17	6.68	1.4	2.16
1433	0	52	*1b/*1b(388G/G,521T/T)	E3/E3	1	1	0.56	3.26	0.93	1.92
1434	1	86	*1b/*15(388G/G,521T/C)	E3/E3	1	1	1.46	3.3	0.7	1.78
1435	0	64	*1a/*15(388A/G,521T/C)	E2/E3	1	1	1.06	3.27	1.46	1.87	1.13	0.57
1436	0	51	*1a/*1b(388A/G,521T/T)	E3/E3	1	1	1.31	3.81	1.21	1.97	0.74	0.83
1437	0	63	*1a/*15(388A/G,521T/C)	E2/E3	1	1	0.84	4.8	1.38	2.89	0.78	0.8
1438	0	79	*15/*15(388G/G,521C/C)	E3/E3	1	0	0.55	2.89	0.81	1.59	1.02	0.76
1439	1	84	*1a/*1b(388A/G,521T/T)	E3/E3	1	1	1.17	4.33	1.6	2.01	1.08	0.55
1440	0	75	*1b/*1b(388G/G,521T/T)	E3/E3	1	1	2.14	6.86	1.48	4.1
1441	1	79	*1a/*1b(388A/G,521T/T)	E3/E3	1	1	1.51	4.55	1.59	2.25	0.91	0.66
1442	0	86	*1a/*1b(388A/G,521T/T)	E3/E3	1	0	1.18	2.81	0.74	1.6	1.29	0.63
1443	0	61	*1b/*1b(388G/G,521T/T)	E3/E3	1	1	2.59	8.78	0.46	0.69	0.91	1.1
1444	1	84	*1a/*1b(388A/G,521T/T)	E3/E3	1	1	0.68	4.45	1.41	2.69	0.8	0.76
1445	1	65	*1b/*1b(388G/G,521T/T)	E3/E3	1	0	1.17	4.76	1.35	3.19	0.82	0.49
1446	0	61	*1a/*1b(388A/G,521T/T)	E3/E3	1	1	1.16	4.42	1.53	2.29	0.96	0.79
1447	1	72	*1a/*1b(388A/G,521T/T)	E2/E3	1	1	0.85	2.04	0.57	1.02	0.85	0.56
1448	1	55	*1b/*15(388G/G,521T/C)	E3/E3	1	1	0.97	4.63	1.13	3.11
1449	0	61	*1b/*1b(388G/G,521T/T)	E3/E4	1	0	1.09	2.56	0.82	1.18
1450	0	72	*1a/*1b(388A/G,521T/T)	E3/E3	1	0	0.74	2.61	0.96	1.27	0.87	0.41
1451	1	93	*1a/*1b(388A/G,521T/T)	E3/E4	1	0	0.76	4.29	1.53	4.05
1452	0	73	*1b/*15(388G/G,521T/C)	E3/E3	1	1	0.42	1.82	0.72	4.81
1453	0	50	*1b/*1b(388G/G,521T/T)	E3/E3	1	1	0.44	3.09	1.02	3.53	0.9	0.44
1454	0	63	*1a/*1b(388A/G,521T/T)	E3/E3	1	0	1.43	2.94	0.45	3.24	0.55	0.68
1455	0	54	*1b/*15(388G/G,521T/C)	E4/E4	1	1	10.19	5.3	0.69	4.58	0.76	0.39
1456	0	37	*1b/*1b(388G/G,521T/T)	E3/E3	1	0	7.46	5.33	0.86	3.58	1.25	0.69
1457	1	57	*1a/*1b(388A/G,521T/T)	E3/E3	1	1	2.33	4.33	1.07	2.34
1458	1	82	*1a/*1b(388A/G,521T/T)	E3/E4	1	1	0.79	4.88	1.33	3.25
1459	1	76	*15/*15(388G/G,521C/C)	E3/E4	1	0	1.02	2.8	0.83	4.5	0.72	0.46
1460	0	73	*1b/*1b(388G/G,521T/T)	E3/E3	1	1	0.64	3.08	0.74	3.95
1461	0	71	*1a/*15(388A/G,521T/C)	E3/E3	1	1	0.94	4.04	1.05	2.65	0.77	0.81
1462	1	84	*1a/*1b(388A/G,521T/T)	E3/E3	1	1	0.91	4.01	1.04	2.58
1463	0	74	*1b/*1b(388G/G,521T/T)	E2/E3	1	0	0.58	2.8	0.64	3.76	0.51	0.53
1464	0	67	*1a/*1b(388A/G,521T/T)	E3/E3	1	0	1.19	3.17	0.73	4.88
1465	1	80	*1a/*1b(388A/G,521T/T)	E3/E3	1	1	1.12	2.74	0.51	4.85	0.55	0.64
1466	0	58	*1a/*1b(388A/G,521T/T)	E3/E3	1	0	0.67	3.82	0.8	4.76
1467	0	59	*1b/*1b(388G/G,521T/T)	E3/E4	1	1	1.51	4.12	0.48	3.17
1468	0	66	*1a/*1b(388A/G,521T/T)	E3/E4	1	0	0.73	3.95	1.1	2.66	1.02	0.83
1469	0	80	*1b/*1b(388G/G,521T/T)	E2/E3	1	1	1.37	3.08	0.89	1.67
1470	0	62	*1b/*1b(388G/G,521T/T)	E3/E3	1	1	0.55	3.24	0.82	2.21	0.9	0.69
1471	0	72	*1b/*15(388G/G,521T/C)	E3/E3	1	0	0.76	3.3	0.83	2.19
1472	1	82	*1a/*1b(388A/G,521T/T)	E3/E3	1	1	0.72	3.7	1.49	1.58
1473	1	68	*1a/*1b(388A/G,521T/T)	E2/E3	1	1	1.72	4.69	0.88	3.37
1474	0	59	*1b/*1b(388G/G,521T/T)	E3/E3	1	1	0.81	2.85	0.52	1.97
1475	0	73	*1a/*1b(388A/G,521T/T)	E2/E3	1	1	1.54	3.28	0.8	1.68
1476	0	96	*1a/*1b(388A/G,521T/T)	E3/E3	1	1	1.6	3.29	1.09	1.68
1477	0	54	*1a/*1b(388A/G,521T/T)	E3/E3	1	0	0.91	2.92	0.65	1.88
1478	0	58	*1a/*1b(388A/G,521T/T)	E2/E2	1	0	0.77	3.78	0.73	1.3
1479	0	80	*1b/*15(388G/G,521T/C)	E3/E3	1	0	0.53	2.05	0.75	4.92
1480	0	53	*1b/*1b(388G/G,521T/T)	E3/E3	1	1	1.97	4.16	1.02	2.14
1481	1	72	*1a/*1a(388A/A,521T/T)	E3/E4	1	1	1.06	3.11	0.99	1.61
1482	0	58	*1a/*1b(388A/G,521T/T)	E3/E3	1	0	0.67	3.82	0.8	2.76
1483	0	73	*1b/*1b(388G/G,521T/T)	E3/E3	1	1	0.64	3.08	0.74	1.95
1484	1	52	*1a/*1b(388A/G,521T/T)	E2/E3	1	1	1.96	7.38	1.55	4.73	1.69	1.43
1485	1	79	*1a/*1b(388A/G,521T/T)	E3/E3	1	1	1.13	6.78	0.65	1.55	0.91	0.55
1486	0	66	*1a/*1b(388A/G,521T/T)	E3/E3	1	0	1.84	6.78	0.34	1.98
1487	0	73	*1a/*1b(388A/G,521T/T)	E2/E3	1	1	0.8	3.92	1.13	2.64
1488	1	84	*1a/*1b(388A/G,521T/T)	E3/E3	1	1	1.11	4.33	1.24	2.76
1489	1	57	*1a/*1a(388A/A,521T/T)	E2/E3	1	1	0.88	5.09	0.61	2.2
1490	1	71	*1a/*1b(388A/G,521T/T)	E3/E3	1	1	1.32	5.6	0.83	1.96
1491	1	73	*1b/*1b(388G/G,521T/T)	E3/E4	1	1	0.81	4.58	1.41	2.84
1492	0	59	*1b/*1b(388G/G,521T/T)	E3/E4	1	1	1.69	3.52	0.68	2.5	0.71	0.78
1493	1	85	*1a/*1a(388A/A,521T/T)	E3/E3	1	1	1.45	3.85	1.03	2.12
1494	1	75	*1b/*1b(388G/G,521T/T)	E3/E3	1	1	1.51	2.44	0.42	1.11	0.59	0.5
1495	0	67	*1a/*1b(388A/G,521T/T)	E2/E3	1	0	0.75	3.23	1.05	1.59
1496	1	86	*1a/*1b(388A/G,521T/T)	E3/E3	1	1	2.42	4.8	0.98	3.21
1497	0	59	*1b/*1b(388G/G,521T/T)	E3/E3	1	1	0.65	2.62	0.73	1.6
1498	1	79	*1a/*1b(388A/G,521T/T)	E3/E3	1	1	0.84	3.08	0.88	1.82	0.94	0.57
1499	1	79	*1a/*1b(388A/G,521T/T)	E3/E3	1	1	0.95	4.21	1.15	2.91
1500	1	78	*1a/*1b(388A/G,521T/T)	E3/E4	1	1	1.6	4.5	1.15	2.53
1501	0	56	*1a/*1b(388A/G,521T/T)	E2/E3	1	1	1.1	4.32	1.42	2.48	1.09	0.73
1502	0	53	*1b/*1b(388G/G,521T/T)	E3/E3	1	1	1.97	4.16	1.02	2.14
1503	0	58	*1a/*1b(388A/G,521T/T)	E3/E3	1	0	0.67	3.82	0.8	2.76
1504	1	83	*1b/*1b(388G/G,521T/T)	E3/E3	1	1	0.73	5.98	1.9	3.93
1505	0	62	*1b/*15(388G/G,521T/C)	E3/E3	1	1	0.66	5.95	0.96	1.81
1506	1	72	*1b/*15(388G/G,521T/C)	E4/E4	1	1	4.47	6.22	0.97	2.54
1507	0	62	*1b/*1b(388G/G,521T/T)	E3/E4	1	0	1.19	4.28	0.76	3.26	0.89	0.99
1508	1	72	*1b/*15(388G/G,521T/C)	E3/E3	1	1	1.11	3.07	0.68	1.95
1509	1	83	*1b/*1b(388G/G,521T/T)	E2/E3	1	1	1.43	4.21	0.98	2.74
1510	1	79	*1b/*15(388G/G,521T/C)	E3/E3	1	1	1.69	4.43	1.04	2.56
1511	1	57	*1a/*1a(388A/A,521T/T)	E2/E3	1	1	0.88	2.09	0.61	5.2
1512	0	47	*1a/*1a(388A/A,521T/T)	E3/E3	1	1	4.02	5.93	0.97	3.71	1.03	1.35
1513	1	62	*1b/*1b(388G/G,521T/T)	E3/E3	1	0	2.92	6.84	1.21	4.35	1.21	1.59
1514	1	80	*1a/*1b(388A/G,521T/T)	E3/E3	1	1	0.9	3.04	0.87	1.85	0.87	0.56
1515	0	59	*1b/*1b(388G/G,521T/T)	E3/E4	1	1	2.86	4.75	0.69	3.36
1516	0	72	*1a/*1b(388A/G,521T/T)	E3/E3	1	0	0.86	3.2	0.98	1.54	1.05	0.56
1517	0	58	*1b/*1b(388G/G,521T/T)	E3/E3	1	1	0.57	2.7	0.77	1.57
1518	1	85	*1a/*1b(388A/G,521T/T)	E3/E3	1	1	1.23	3.45	0.81	2.05	0.81	0.59
1519	0	79	*1a/*1a(388A/A,521T/T)	E3/E3	1	0	2.2	3.88	0.98	2.2
1520	1	84	*1a/*1b(388A/G,521T/T)	E3/E3	1	1	1	5.7	0.73	1.51	0.76	0.42
1521	1	59	*15/*15(388G/G,521C/C)	E3/E3	1	1	1.56	3.42	0.95	1.72	1.16	0.64
1522	0	67	*1a/*15(388A/G,521T/C)	E3/E3	1	1	0.83	2.06	0.6	1.08
1523	0	83	*1b/*1b(388G/G,521T/T)	E2/E3	1	1	0.98	3.35	0.84	1.95
1524	1	72	*1a/*1b(388A/G,521T/T)	E2/E3	1	1	0.86	3.96	1.29	2.08
1525	1	71	*1a/*1b(388A/G,521T/T)	E3/E3	1	1	1.46	4.36	0.8	2.87	0.93	0.86
1526	0	87	*1b/*1b(388G/G,521T/T)	E3/E3	1	1	0.48	3.51	1	2.34
1527	0	50	*1b/*1b(388G/G,521T/T)	E3/E4	1	0	2.67	3.34	0.92	1.59	1.11	0.72
1528	0	78	*1a/*1a(388A/A,521T/T)	E2/E3	1	1	1.77	3.48	1.08	1.84	1.06	0.69
1529	0	63	*1a/*1b(388A/G,521T/T)	E3/E3	1	1	1.16	3.52	1.24	1.65	1.4	0.61
1530	1	67	*1b/*15(388G/G,521T/C)	E3/E4	1	1	1.26	5.17	0.98	3.86
1531	1	79	*1b/*1b(388G/G,521T/T)	E2/E3	1	1	1.95	3.56	1.2	5.46
1532	1	80	*1a/*1b(388A/G,521T/T)	E3/E3	1	1	0.82	5.61	0.8	5.44	0.95	0.47
1533	1	89	*1a/*1a(388A/A,521T/T)	E3/E3	1	1	1.64	4.8	0.98	3.36
1534	1	83	*1b/*1b(388G/G,521T/T)	E3/E3	1	1	1.08	4.33	1.65	1.79
1535	0	70	*1b/*15(388G/G,521T/C)	E3/E3	1	0	1.71	3.5	0.57	2.33
1536	1	75	*1b/*1b(388G/G,521T/T)	E3/E3	1	1	2.41	4.88	0.96	2.81	1.16	0.93
1537	0	51	*1a/*15(388A/G,521T/C)	E3/E3	1	0	0.67	4.08	1.36	2.43	1.09	0.57
1538	0	72	*1b/*1b(388G/G,521T/T)	E3/E4	1	1	1.84	3.38	0.53	5.12
1539	0	76	*1a/*1a(388A/A,521T/T)	E3/E4	1	1	1.06	4.25	0.86	3.23
1540	0	60	*1a/*1b(388A/G,521T/T)	E3/E3	1	1	1.23	4.22	0.78	2.67
1541	1	80	*1a/*1b(388A/G,521T/T)	E3/E3	1	1	1.44	2.82	0.75	1.58	0.98	0.53
1542	1	45	*1a/*1b(388A/G,521T/T)	E4/E4	1	0	2.41	4.42	0.71	2.96
1543	0	60	*1a/*1b(388A/G,521T/T)	E3/E3	1	0	1.12	2.37	0.4	4.5	0.44	0.49
1544	1	57	*1b/*1b(388G/G,521T/T)	E3/E3	1	1	0.85	2.48	0.67	1.39
1545	0	84	*1a/*1b(388A/G,521T/T)	E3/E3	1	1	0.8	3.75	0.79	2.27
1546	0	63	*1b/*1b(388G/G,521T/T)	E3/E3	1	1	0.94	6.24	0.81	3.43
1547	0	74	*1b/*1b(388G/G,521T/T)	E2/E4	1	1	2.51	4.41	0.83	2.94
1548	1	89	*1b/*1b(388G/G,521T/T)	E3/E3	1	1	1.79	5.18	1.16	3.73	1.15	1.06
1549	1	60	*1a/*1b(388A/G,521T/T)	E3/E3	1	1	1.37	3.76	0.81	2.49
1550	0	52	*1b/*1b(388G/G,521T/T)	E3/E4	1	0	1.12	3.78	0.86	4.56
1551	0	63	*1a/*1a(388A/A,521T/T)	E3/E3	1	1	3.7	4.25	0.64	4.07
1552	0	73	*1a/*1b(388A/G,521T/T)	E3/E3	1	1	1.16	2.69	0.93	1.29
1553	0	51	*1a/*15(388A/G,521T/C)	E3/E3	1	0	0.65	3.52	1.29	4.9
1554	1	85	*1a/*1b(388A/G,521T/T)	E3/E3	1	1	1.17	4.49	0.97	2.97
1555	0	51	*1a/*1b(388A/G,521T/T)	E3/E3	1	0	0.85	1.98	0.36	1.21
1556	1	58	*1b/*1b(388G/G,521T/T)	E3/E4	1	1	1.46	4.28	1.02	2.95
1557	0	76	*1b/*1b(388G/G,521T/T)	E3/E3	1	0	0.89	3.23	1.07	4.65
1558	0	43	*1a/*1b(388A/G,521T/T)	E3/E3	1	1	15.93	6.16	0.73	4.91
1559	1	79	*1a/*1b(388A/G,521T/T)	E3/E3	1	1	1.43	2.53	0.7	4.26	2.96	0.98
1560	0	57	*1a/*1b(388A/G,521T/T)	E3/E4	1	1	1.42	3.43	0.72	4.04
1561	0	53	*1b/*1b(388G/G,521T/T)	E3/E3	1	1	1.78	3.3	0.76	5.83	2.9	0.94
1562	0	74	*1b/*15(388G/G,521T/C)	E3/E3	1	1	1.94	4.08	0.64	2.91
1563	0	50	*1a/*1a(388A/A,521T/T)	E3/E3	1	0	4.8	5.15	0.72	5.73
1564	1	71	*1a/*1b(388A/G,521T/T)	E3/E3	1	0	2.07	3.65	1.03	5.35
1565	1	69	*1a/*1b(388A/G,521T/T)	E3/E4	1	1	1.28	5.49	1.08	3.71
1566	0	74	*1b/*15(388G/G,521T/C)	E3/E4	1	1	2.51	4.41	0.83	2.94
1567	1	66	*1a/*1b(388A/G,521T/T)	E2/E3	1	0	1.44	4.61	0.55	2.76	1.53	0.8
1568	0	60	*1b/*15(388G/G,521T/C)	E3/E3	1	1	1.88	6.81	0.63	1.38
1569	0	63	*1a/*1b(388A/G,521T/T)	E3/E3	1	1	1.77	4.52	0.87	2.95
1570	0	84	*1a/*1b(388A/G,521T/T)	E3/E3	1	1	0.6	3.61	0.95	2.05	0.71	0.91
1571	0	84	*1b/*1b(388G/G,521T/T)	E3/E3	1	1	0.94	2.56	0.8	1.38	0.99	0.47
1572	0	59	*1b/*1b(388G/G,521T/T)	E3/E3	1	1	1.32	4.79	1.15	2.83	1.07	0.93
1573	0	36	*1b/*15(388G/G,521T/C)	E3/E3	1	0	1.69	3.24	0.97	1.63
1574	1	63	*1b/*1b(388G/G,521T/T)	E3/E3	1	0	0.93	4.18	1.92	1.48	1.88	0.53
1575	1	68	*1b/*15(388G/G,521T/C)	E3/E3	1	1	0.78	3.65	0.98	2.31	1.07	0.7
1576	0	53	*1b/*1b(388G/G,521T/T)	E3/E4	1	1	1.87	4.87	0.8	3.36
1577	1	56	*1b/*1b(388G/G,521T/T)	E3/E3	1	0	2.4	4.83	0.84	2.81	1.03	0.87
1578	0	70	*1b/*15(388G/G,521T/C)	E2/E3	1	1	0.69	3.35	0.84	1.92
1579	0	44	*1b/*1b(388G/G,521T/T)	E3/E3	1	1	1.93	4.04	0.82	2.67
1580	0	59	*1b/*1b(388G/G,521T/T)	E3/E4	1	1	7.5	6.24	0.79	2.35	1.08	0.93
1581	0	62	*1b/*1b(388G/G,521T/T)	E3/E3	1	0	0.71	3.03	0.81	1.77	0.76	0.51
1582	0	58	*1b/*1b(388G/G,521T/T)	E3/E4	1	1	3.26	4.62	1.09	2.62
1583	0	49	*1a/*1b(388A/G,521T/T)	E3/E3	1	1	1.15	4.04	0.98	2.12
1584	0	82	*1a/*1b(388A/G,521T/T)	E3/E3	1	0	1.24	4.43	0.81	2.91
1585	1	62	*1b/*15(388G/G,521T/C)	E2/E3	1	1	2.44	4.25	0.9	2.36
1586	1	80	*1a/*1b(388A/G,521T/T)	E3/E3	1	1	1.35	2.77	0.73	4.37	0.92	0.5
1587	1	71	*1b/*15(388G/G,521T/C)	E2/E3	1	1	1.32	2.95	0.9	4.47
1588	0	84	*1a/*1b(388A/G,521T/T)	E3/E3	1	1	0.67	4.19	0.85	1.56
1589	1	68	*1b/*1b(388G/G,521T/T)	E3/E3	1	0	0.73	5.98	1.96	3.31	1.7	0.86
1590	1	89	*1b/*1b(388G/G,521T/T)	E2/E3	1	1	0.73	3.14	0.86	4.17	1.39	0.4
1591	0	57	*1a/*1a(388A/A,521T/T)	E2/E3	1	1	1.21	4.15	1.25	2.33
1592	1	89	*1b/*1b(388G/G,521T/T)	E3/E3	1	1	0.36	4.11	1.73	1.63	1.46	0.46
1593	0	87	*1a/*1b(388A/G,521T/T)	E2/E4	1	0	0.33	1.41	0.57	0.38
1594	0	75	*1b/*1b(388G/G,521T/T)	E3/E3	1	1	1.12	2.99	0.66	1.72	0.74	0.61
1595	0	51	*1b/*1b(388G/G,521T/T)	E3/E3	1	0	1.78	4.74	0.97	2.78
1596	0	53	*1b/*15(388G/G,521T/C)	E3/E3	1	1	2.04	4.46	0.56	2.73
1597	0	72	*1b/*1b(388G/G,521T/T)	E3/E3	1	1	1.63	5.19	0.83	3.54
1598	1	68	*1b/*1b(388G/G,521T/T)	E3/E3	1	1	0.8	3.26	1.32	1.45
1599	1	67	*1b/*1b(388G/G,521T/T)	E3/E3	1	0	0.58	5.29	1.62	3.02
1600	0	59	*1a/*15(388A/G,521T/C)	E3/E4	1	0	1.84	3.21	1.39	4.56	1.37	1.57
1601	0	72	*1b/*1b(388G/G,521T/T)	E3/E3	1	0	1.13	4.84	0.53	1.85
1602	1	81	*1a/*15(388A/G,521T/C)	E3/E3	1	1	0.36	4.47	0.99	1.47	1.02	0.47
1603	1	73	*1b/*1b(388G/G,521T/T)	E3/E3	1	1	1.15	3.03	0.96	1.48
1604	0	70	*1b/*15(388G/G,521T/C)	E3/E3	1	1	0.99	3.21	0.65	1.85
1605	0	71	*1a/*1b(388A/G,521T/T)	E3/E3	1	1	1.15	4.08	0.84	2.23
1606	1	80	*1a/*1b(388A/G,521T/T)	E3/E3	1	1	0.87	2.18	0.78	1.18	1.96	0.46
1607	1	73	*1b/*15(388G/G,521T/C)	E3/E3	1	1	1.28	3.41	0.74	1.85
1608	1	62	*1b/*1b(388G/G,521T/T)	E2/E3	1	0	2	5.7	1.25	3.35
1609	0	62	*1b/*1b(388G/G,521T/T)	E3/E3	1	0	1.92	4.92	1.01	3.53	1.1	1.05
1610	0	86	*1b/*15(388G/G,521T/C)	E3/E4	1	0	0.62	3.48	1.03	4.42
1611	0	62	*1a/*1a(388A/A,521T/T)	E3/E3	1	1	1	2.72	0.64	5.64	1.67	1.51
1612	0	79	*1b/*1b(388G/G,521T/T)	E3/E3	1	1	1.15	3.92	0.76	2.51
1613	1	71	*1a/*15(388A/G,521T/C)	E3/E3	1	1	1.05	4.09	1.1	2.16	1.03	0.77
1614	1	63	*1b/*1b(388G/G,521T/T)	E3/E3	1	0	0.95	4.97	2.26	2.52	2.23	1.81
1615	0	84	*1a/*1b(388A/G,521T/T)	E3/E3	1	1	0.81	3.4	0.62	1.82	0.68	0.59
1616	0	71	*1a/*1b(388A/G,521T/T)	E3/E3	1	1	1.19	4.15	0.8	2.45
1617	0	60	*1a/*1b(388A/G,521T/T)	E3/E3	1	1	1.68	4.01	0.91	2.3
1618	1	73	*1b/*1b(388G/G,521T/T)	E3/E3	1	1	0.66	4.72	1.02	1.26
1619	0	33	*1b/*1b(388G/G,521T/T)	E3/E3	1	0	0.99	4.31	0.39	1.37	1.35	0.43
1620	0	75	*1a/*1a(388A/A,521T/T)	E3/E3	1	1	1.21	4.82	1.08	3.06	1.1	1.01
1621	0	56	*1a/*1b(388A/G,521T/T)	E3/E3	1	0	1.56	4.04	0.71	2.46
1622	0	58	*1a/*1b(388A/G,521T/T)	E3/E3	1	1	1.16	2.78	0.93	1.36
1623	1	80	*1a/*1b(388A/G,521T/T)	E3/E3	1	1	1.3	2.38	0.67	1.14	1.02	0.46
1624	1	61	*1b/*1b(388G/G,521T/T)	E3/E3	1	1	1.73	5.63	1.03	3.82
1625	0	84	*1b/*1b(388G/G,521T/T)	E3/E3	1	1	1.18	3.1	0.96	1.64
1626	1	59	*1b/*1b(388G/G,521T/T)	E3/E4	1	1	1.35	4.08	1.22	6.05
1627	0	81	*1a/*1b(388A/G,521T/T)	E3/E3	1	1	1.05	3.64	0.73	6.28
1628	1	73	*1b/*15(388G/G,521T/C)	E3/E3	1	1	0.77	2.9	0.89	6.55
1629	0	70	*1b/*15(388G/G,521T/C)	E3/E3	1	0	1.76	2.69	0.38	4.53
1630	0	67	*1b/*1b(388G/G,521T/T)	E3/E4	1	1	2.89	6.2	0.53	1.32	1.89	0.66
1631	0	82	*1b/*1b(388G/G,521T/T)	E2/E3	1	1	2.18	3.37	0.7	1.64
1632	0	27	*1b/*1b(388G/G,521T/T)	E3/E4	1	0	0.73	3.14	1.21	1.54
1633	0	71	*1a/*1b(388A/G,521T/T)	E3/E3	1	1	1.19	4.15	0.8	2.45
1634	0	62	*1a/*1a(388A/A,521T/T)	E3/E3	1	1	0.75	2.76	0.92	1.18
1635	1	80	*1a/*1b(388A/G,521T/T)	E3/E3	1	1	1.3	2.44	0.72	1.13
1636	1	63	*1a/*1b(388A/G,521T/T)	E4/E4	1	1	1.86	4.67	0.95	4.08	1.17	1.12
1637	0	71	*1a/*1b(388A/G,521T/T)	E3/E3	1	1	1.38	2.39	0.43	1.18
1638	1	73	*1b/*15(388G/G,521T/C)	E3/E3	1	1	0.77	5.9	0.89	4.55
1639	1	63	*1a/*1b(388A/G,521T/T)	E4/E4	1	1	1.86	4.67	0.95	3.08
1640	0	47	*1b/*1b(388G/G,521T/T)	E2/E3	1	1	0.94	5.98	0.76	5.74
1641	0	70	*1b/*15(388G/G,521T/C)	E3/E3	1	0	0.95	5.32	0.45	5.27
1642	1	61	*1b/*1b(388G/G,521T/T)	E3/E3	1	0	1.38	4.35	0.76	2.97
1643	0	70	*1b/*15(388G/G,521T/C)	E3/E3	1	0	0.95	2.32	0.45	5.27
1644	1	61	*1a/*1a(388A/A,521T/T)	E3/E3	1	1	0.93	4.2	1.49	2.27	1.39	0.77
1645	1	59	*1a/*1b(388A/G,521T/T)	E3/E3	1	1	1.98	4.47	1.01	2.87
1646	1	80	*1a/*1b(388A/G,521T/T)	E3/E3	1	1	1.26	4.94	0.93	1.53	1.15	0.66
1647	0	66	*1a/*1b(388A/G,521T/T)	E3/E3	1	1	0.78	2.7	0.92	1.49
1648	0	71	*1a/*1b(388A/G,521T/T)	E3/E3	1	1	0.57	4.88	0.76	0.79
1649	0	55	*1b/*1b(388G/G,521T/T)	E3/E3	1	0	1.57	5.16	1.37	2.97
1650	0	70	*1a/*1a(388A/A,521T/T)	E3/E3	1	0	0.63	2.72	1	1.24
1651	0	35	*1a/*1b(388A/G,521T/T)	E3/E4	1	1	3.11	4.56	0.93	6.81	1.06	1.19
1652	0	55	*1a/*1a(388A/A,521T/T)	E3/E3	1	1	2.5	5	0.65	3.1	1.96	1.14
1653	0	92	*1a/*1b(388A/G,521T/T)	E3/E3	1	1	1.3	4.35	0.81	2.84	1.96	1.14
1654	0	58	*1b/*15(388G/G,521T/C)	E2/E3	1	0	1.88	3.91	0.49	2.24
1655	0	64	*1b/*1b(388G/G,521T/T)	E3/E3	1	1	1.67	2.83	0.52	5.83
1656	0	69	*1b/*1b(388G/G,521T/T)	E3/E3	1	1	1.09	4.86	1.52	2.72
1657	1	61	*1a/*1b(388A/G,521T/T)	E3/E3	1	1	3.75	5.45	0.98	2.89
1658	0	65	*1a/*1b(388A/G,521T/T)	E3/E3	1	1	1.25	4.44	1.18	2.64	1.27	1.33
1659	1	90	*1b/*1b(388G/G,521T/T)	E3/E3	1	0	0.61	3.97	1.11	5.49	1.09	1.54
1660	1	80	*1a/*1b(388A/G,521T/T)	E3/E3	1	1	1.26	3.94	0.93	5.53
1661	0	66	*1a/*1b(388A/G,521T/T)	E3/E3	1	1	0.78	6.7	0.92	1.49
1662	1	45	*1a/*1b(388A/G,521T/T)	E4/E4	1	0	1.23	4.82	0.89	6.28
1663	0	76	*1a/*1a(388A/A,521T/T)	E3/E3	1	1	0.95	2.98	0.81	1.62
1664	1	58	*1a/*1b(388A/G,521T/T)	E2/E3	1	1	0.68	3.36	1.25	1.86
1665	0	64	*1b/*1b(388G/G,521T/T)	E3/E3	1	1	1.67	2.83	0.52	1.83
1666	0	71	*1a/*1b(388A/G,521T/T)	E3/E3	1	1	0.57	5.88	0.76	5.79
1667	0	58	*1b/*15(388G/G,521T/C)	E2/E3	1	0	1.88	3.91	0.49	6.24
1668	1	83	*1a/*1b(388A/G,521T/T)	E3/E4	1	1	1.1	4.17	1.11	2.06
1669	0	76	*1a/*1b(388A/G,521T/T)	E2/E3	1	1	1.11	5.13	0.91	0.69
1670	1	73	*1b/*1b(388G/G,521T/T)	E3/E3	1	1	1.64	3.79	0.91	2.11
1671	1	74	*1a/*1b(388A/G,521T/T)	E3/E3	1	1	1.36	4.48	0.9	2.91
1672	0	56	*1b/*15(388G/G,521T/C)	E3/E4	1	1	3.2	4.6	0.85	2.32
1673	1	75	*1b/*1b(388G/G,521T/T)	E3/E3	1	1	1.18	52.81	1.15	6.1
1674	0	76	*1b/*15(388G/G,521T/C)	E3/E4	1	1	0.61	4.79	0.99	6.44
1675	1	64	*1b/*1b(388G/G,521T/T)	E3/E3	1	1	1.6	5.73	0.17	6.72
1676	0	88	*1b/*1b(388G/G,521T/T)	E3/E3	1	1	0.73	5.54	1.42	1.85
1677	1	74	*1b/*1b(388G/G,521T/T)	E3/E3	1	1	0.46	5.93	1.31	4.79	1.87	1.95
1678	1	73	*1b/*1b(388G/G,521T/T)	E3/E3	1	0	1.02	3.38	0.85	5.95	1.96
1679	1	83	*1a/*1b(388A/G,521T/T)	E2/E3	1	1	1.85	3.27	1.14	5.53	1.96
1680	0	62	*1b/*1b(388G/G,521T/T)	E3/E3	1	1	0.89	2.96	0.98	5.56	1.85
1681	0	69	*1a/*1b(388A/G,521T/T)	E3/E3	1	1	0.7	4.23	1.06	3	1.68
1682	0	58	*1a/*1b(388A/G,521T/T)	E3/E3	1	1	0.67	3.56	1.32	1.79	1.54	0.96
1683	1	81	*1a/*1b(388A/G,521T/T)	E3/E3	1	1	1.2	2.55	0.77	1.23	1.93	0.52
1684	1	59	*1a/*1b(388A/G,521T/T)	E3/E3	1	1	0.56	3.2	1.08	1.51	1.65
1685	1	50	*1b/*15(388G/G,521T/C)	E3/E3	1	1	1.91	3	0.55	1.5	1.62
1686	0	78	*1a/*1b(388A/G,521T/T)	E3/E3	1	1	1.19	5.85	0.81	1.56	2.32	0.92
1687	0	83	*1a/*1b(388A/G,521T/T)	E3/E3	1	1	0.93	3.38	1.34	1.46	1.62	1.52
1688	0	58	*1a/*1b(388A/G,521T/T)	E3/E3	1	0	0.89	2.62	1.07	0.98	1.32
1689	0	65	*1a/*15(388A/G,521T/C)	E3/E3	1	1	1.1	5.79	1.27	3.67	1.35
1690	0	59	*1a/*15(388A/G,521T/C)	E2/E3	1	1	0.77	5.84	0.82	1.48	1.65
1691	1	81	*1a/*1b(388A/G,521T/T)	E3/E3	1	1	1.32	3.62	0.78	1.33	1.83	0.9
1692	0	64	*1b/*1b(388G/G,521T/T)	E3/E3	1	1	1.13	3.45	0.84	2.04	1.56
1693	0	71	*1a/*1b(388A/G,521T/T)	E3/E3	1	1	1.53	4.61	0.92	2.92	1.63
1694	0	42	*1a/*1a(388A/A,521T/T)	E2/E3	1	1	3.46	3.94	0.55	2.14	1.48
1695	0	69	*1a/*1b(388A/G,521T/T)	E3/E3	1	1	0.83	3.85	0.99	2	1.04	1.24
1696	0	58	*1a/*1b(388A/G,521T/T)	E3/E3	1	0	2.35	7.21	0.8	5.42	1.7
1697	1	53	*1a/*1b(388A/G,521T/T)	E3/E3	1	1	1.55	4.79	0.71	4.9	1.9
1698	1	68	*1b/*1b(388G/G,521T/T)	E3/E3	1	1	2.14	5.43	1.05	3.78	1.58
1699	0	64	*1b/*1b(388G/G,521T/T)	E3/E3	1	1	1.27	4.78	1.04	4.94	1.76
1700	0	70	*1a/*1b(388A/G,521T/T)	E3/E3	1	1	1.35	2.83	0.63	4.45	1.36
1701	1	76	*1b/*1b(388G/G,521T/T)	E3/E4	1	0	1.88	4.7	0.84	5.78	2.65
1702	0	72	*1a/*1b(388A/G,521T/T)	E3/E3	1	1	1.01	5.02	1.04	5.27	1.95
1703	0	49	*1b/*1b(388G/G,521T/T)	E3/E3	1	0	0.73	2.41	0.63	4.22	1.2
1704	0	52	*1a/*1b(388A/G,521T/T)	E3/E3	1	0	0.68	3.02	0.61	4.9	1.95
1705	0	72	*1b/*15(388G/G,521T/C)	E3/E3	1	1	2.35	7.21	0.8	5.42	1.65
1706	1	85	*1b/*15(388G/G,521T/C)	E3/E4	1	1	1.74	3.93	0.64	2.29	1.95
1707	1	81	*1a/*1b(388A/G,521T/T)	E3/E3	1	1	1.02	2.26	0.71	1.15	2.83	1.44
1708	0	67	*1a/*15(388A/G,521T/C)	E2/E3	1	1	1.32	3.8	1.31	2.06
1709	1	69	*1a/*1b(388A/G,521T/T)	E4/E4	1	1	1.18	5.91	0.8	4.38
1710	0	55	*1b/*1b(388G/G,521T/T)	E3/E3	1	0	1.54	5.33	1.29	3.44	1.19	1.1
1711	1	70	*1b/*15(388G/G,521T/C)	E3/E3	1	1	3.07	7.31	1.25	4.87	1.19	1.7
1712	1	89	*1a/*1b(388A/G,521T/T)	E3/E4	1	1	1.19	3.8	0.95	2.13
1713	0	81	*1a/*1b(388A/G,521T/T)	E3/E3	1	1	0.65	3.5	1.37	1.67
1714	0	42	*1b/*1b(388G/G,521T/T)	E3/E3	1	0	0.6	4.88	0.91	3.83	0.86	1.15
1715	0	54	*1b/*15(388G/G,521T/C)	E3/E3	1	1	2.36	6.4	0.57	4.96
1716	1	90	*1b/*1b(388G/G,521T/T)	E3/E3	1	0	1.8	4.36	0.83	2.63
1717	1	71	*1a/*1b(388A/G,521T/T)	E3/E4	1	1	1.94	5.16	0.49	5.34	0.42	1.02
1718	0	73	*1a/*1b(388A/G,521T/T)	E3/E3	1	1	0.83	5.93	0.74	4.95
1719	0	80	*1b/*1b(388G/G,521T/T)	E3/E3	1	1	0.74	3.87	1.19	2.17
1720	1	83	*1b/*1b(388G/G,521T/T)	E3/E3	1	0	0.82	4.67	1.1	5.79
1721	0	52	*1a/*1b(388A/G,521T/T)	E3/E3	1	1	1.41	4.41	1.04	2.92	1.13	0.89
1722	1	81	*1a/*1b(388A/G,521T/T)	E3/E3	1	1	1.35	6.63	0.76	4.89	2.84	0.85
1723	0	69	*1b/*1b(388G/G,521T/T)	E3/E3	1	1	0.42	5.36	1.06	0.68
1724	0	66	*1b/*15(388G/G,521T/C)	E3/E3	1	1	0.64	5.7	0.98	1.32
1725	0	60	*1b/*15(388G/G,521T/C)	E3/E3	1	1	1.7	5.78	1.25	3.81	1.02	1.17
1726	0	44	*1b/*1b(388G/G,521T/T)	E3/E3	1	1	0.84	3.98	1.72	2.04
1727	1	81	*1a/*1b(388A/G,521T/T)	E3/E3	1	1	1.69	5.84	0.76	1.3	0.83	0.43
1728	0	61	*1b/*1b(388G/G,521T/T)	E3/E4	1	1	1.78	4.6	0.72	4.84
1729	0	62	*1a/*1b(388A/G,521T/T)	E3/E3	1	0	0.68	5.63	0.66	5.46
1730	0	49	*1a/*1b(388A/G,521T/T)	E3/E3	1	0	0.65	3.58	1.34	1.84	1.01	0.98
1731	0	51	*1a/*1a(388A/A,521T/T)	E3/E3	1	1	2.93	4.5	0.97	5.36	0.88	0.95
1732	0	72	*1b/*1b(388G/G,521T/T)	E3/E4	1	1	1.61	4.1	0.98	5.38	1.01	0.5
1733	0	43	*1a/*15(388A/G,521T/C)	E3/E3	1	1	1.18	5.89	0.88	5.63	2.9	0.85
1734	0	74	*1b/*1b(388G/G,521T/T)	E3/E3	1	1	10.32	6.42	0.81	5.01	2.75	0.35
1735	0	51	*1b/*1b(388G/G,521T/T)	E3/E3	1	1	1.11	5.31	0.85	5.86	1.9	0.64
1736	0	45	*1b/*15(388G/G,521T/C)	E3/E3	1	0	1.09	5.46	1.85	3.47	1.65
1737	0	74	*1a/*1b(388A/G,521T/T)	E3/E3	1	1	0.77	5.12	0.7	6.17	1.84
1738	1	61	*1b/*1b(388G/G,521T/T)	E3/E3	1	1	1.16	4.35	1.23	5.67
